# Supplementary material for: A survey of optimal strategy for signature-based drug repositioning and an application to liver cancer
Source: eLife journal article supplement (doi:10.7554/elife.71880), 2022-02-18
Supplement: supp [file elife-71880-supp-v1.zip]

Archive with 27 entries (27 files):
- elife_poa_e71880_Figure_1_figure_supplement_1.pdf
- elife_poa_e71880_Figure_1_figure_supplement_2.pdf
- elife_poa_e71880_Figure_2_figure_supplement_1.pdf
- elife_poa_e71880_Figure_4_figure_supplement_1.pdf
- elife_poa_e71880_Figure_4_figure_supplement_2.pdf
- elife_poa_e71880_Figure_5_figure_supplement_1.pdf
- elife_poa_e71880_Figure_6_figure_supplement_1.pdf
- elife_poa_e71880_Figure_6_figure_supplement_2.pdf
- elife_poa_e71880_Figure_7_figure_supplement_1.pdf
- elife_poa_e71880_Figure_7_figure_supplement_2.pdf
- elife_poa_e71880_Figure_7_figure_supplement_3.pdf
- elife_poa_e71880_Figure_7_figure_supplement_4.pdf
- elife_poa_e71880_Figure_7_figure_supplement_5.pdf
- elife_poa_e71880_Figure_8_figure_supplement_1.pdf
- elife_poa_e71880_Figure_8_figure_supplement_2.pdf
- elife_poa_e71880_Supplementary_file_1.xlsx
- elife_poa_e71880_Supplementary_file_2.xlsx
- elife_poa_e71880_Supplementary_file_3.xlsx
- elife_poa_e71880_Supplementary_file_4.xlsx
- elife_poa_e71880_Supplementary_file_5.xlsx
- elife_poa_e71880_Supplementary_file_6.xlsx
- elife_poa_e71880_Supplementary_file_7.xlsx
- elife_poa_e71880_Supplementary_file_8.xlsx
- elife_poa_e71880_Figure_7_source_data_1.xlsx
- elife_poa_e71880_Figure_8_source_data_1.xlsx
- elife_poa_e71880_Figure_8_source_data_2.pdf
- elife_poa_e71880_Transparent_Reporting_File.docx
