# Supplementary material for: A survey of optimal strategy for signature-based drug repositioning and an application to liver cancer
Source: eLife journal article supplement (doi:10.7554/elife.71880), 2022-02-18
Supplement: supp [file elife-71880-supp-v1.zip]

## ASPECT 1

Compound  
signature

Raw data processing

Choosing the optimal pipeline to process raw data from L1000 assay into compound signatures may improve the performance of L1000 data for down-stream applications

Source of cell line

Many perturbation-induced changes are likely to be cell-type specific and merging transcriptional effects from different cell lines or using unrepresentative cell line may not produce reliable results

Perturbation time

Improper perturbation time may mask the compound specific transcriptional signal and cannot reflect the actual MOA of compounds and thus affect the prediction accuracy

Perturbation dose

Selecting an appropriate perturbation dose is crucial to obtain representative compound signatures for drug retrieval

## ASPECT 2

Disease  
signature

Dataset quality

Quality datasets can better recapitulate the molecular features of corresponding diseases, and thus the results of drug retrieval are more likely to have clinical therapeutic potential

Clinical phenotype

Using signatures representing distinct clinical phenotypes to query LINCS could be the potential factor affecting retrieval performance

Signature size

The successful discovery of real biological connections between compound and disease may also depend on query signature size

## ASPECT 3

Methods for connecting  
disease and compound

Disease-compound matching  
algorithms for drug retrieval

 Meaning that the investigation of this factor will not be included in the present study
