# Supplementary material for: A survey of optimal strategy for signature-based drug repositioning and an application to liver cancer
Source: eLife journal article supplement (doi:10.7554/elife.71880), 2022-02-18
Supplement: supp [file elife-71880-supp-v1.zip › elife_poa_e71880_Figure_7_source_data_1.xlsx]

## Sheet: Sheet1
Symbol	Hep3B	HepG2_0.1	HepG2_10	HepG2_1	HepG2_0.5	Huh6	Huh7	PLC
A1BG	-0.492995	-0.372671	0.918361	-0.185665	0.944176	-1.64345	-0.23066	-0.61131
A1BG-AS1	-1.82662	-2.50028	-1.42383	-0.248181	0.731267		0.41364	0.309969
A1CF	-0.611557	1.14748	0.256573	0.925575	0.593065	0.810479	-0.770847	-0.537404
A2M	-1.31189	-0.937458	-1.92312	-1.27673	-1.96607	-0.862049	-1.57385	-1.10181
A2M-AS1	-2.71847	-1.20748	-0.967703	-0.880351	-0.78022		-1.59427	-1.37049
A2ML1							0.592941
A2ML1-AS1
A2ML1-AS2
A2MP1	3.26406		1.68469	1.91922	2.77312		2.97627	5.37652
A3GALT2			-0.484773		-0.147125	-3.57846
A4GALT	0.47561	3.85744	6.08422	5.47375	6.06041	0.0207497	2.29271	-1.03851
A4GNT	-4.07083						-4.23139
AA06
AAAS	0.15808	-0.164372	0.192822	0.127565	0.17105	0.186634	-0.0345502	0.287191
AACS	0.140963	-0.431913	0.445356	-0.134033	0.0820302	0.330511	0.56901	0.087422
AACSP1		3.62136	4.9448	5.25931	4.83925	1.26183
AADAC	-0.679075	-0.517158	-1.1661	-0.137286	-1.29866		-0.5763	-1.87108
AADACL2
AADACL2-AS1		3.52085		2.90125	5.3149
AADACL3	-0.928744
AADACL4
AADACP1	-0.948187	1.33825	1.15979	1.63594	1.79226		0.457703
AADAT	-0.867976	0.242575	-0.437545	0.0762175	-0.64634	-0.215186	-0.614111	0.292431
AAED1	-0.942558	0.107842	-0.802128	-0.539321	-1.31253	-0.720696	0.380594	-0.500238
AAGAB	0.189744	0.144403	0.414816	0.519969	0.241436	0.83653	-0.0402304	0.148622
AAK1	0.930375	0.883889	0.0657828	0.809769	0.221699	1.1336	0.77807	0.214049
AAMDC	-0.164546	-0.291704	-0.494738	-0.0548896	-0.938401	-0.130199	0.055855	0.181559
AAMP	-0.570245	-0.637274	0.373698	-0.402983	0.329674	-0.429107	-0.129497	-0.469905
AANAT	0.579292						1.69446	1.09156
AAR2	0.397531	0.620216	0.474611	0.579298	0.685347	0.438789	0.636206	0.428418
AARD
AARS	-1.32217	-1.05951	-0.881515	-1.01346	-0.777332	-1.18193	-0.716568	-1.11776
AARS2	-0.286611	-0.0383001	0.632065	0.397574	0.621488	0.688233	0.523153	-0.340777
AARSD1	0.380686	0.491565	1.00565	0.83708	0.633282	0.707495	0.770797	0.765632
AARSP1
AASDH	0.44688	0.844589	0.218114	0.883507	0.280256	0.175046	0.983801	1.26671
AASDHPPT	-0.176546	0.268176	-0.452527	0.0148967	-0.382521	-0.152139	0.0683001	0.225576
AASS	0.705335	0.284841	0.775035	1.29848	0.25976	0.895685	1.79891	1.65405
AATBC	1.10529	1.50188	1.15471	0.720079	1.85046	-0.662738	-0.827137	-0.248989
AATF	0.16642	0.59587	0.576576	0.307106	0.879979	0.2392	0.0591644	0.0254366
AATK	-0.364551	1.1724	2.16886	1.79384	2.60154	-0.529167	1.27779	-1.53374
AATK-AS1		-0.95016	1.0218	0.719794	1.33048		-0.574474
AB015752.1	-1.32515						-0.0863346
ABALON	-0.121644	0.649828	1.61187	0.998428	1.34126	-0.0334549	0.382116	-0.502334
ABAT	0.308315	-0.294191	0.32656	0.370202	-0.184601	-0.499971	-0.933787	-0.767727
ABBA01000935.2
ABBA01006766.1
ABBA01006766.2
ABBA01031660.1
ABBA01031661.1
ABBA01031663.1		-1.45953	-0.256205	-0.139231	0.427984		0.110347
ABBA01031674.1	-0.375934	-1.0704	-1.38483	-1.41353	0.592404	0.722806	0.253747	-0.0327296
ABBA01040607.1		0.0307733	0.636285	1.17195	1.26942		0.710347	-1.01809
ABCA1	-2.4026	-0.941155	-1.53686	-0.985457	-1.07073	0.757928	-2.66845	-1.91557
ABCA10	1.52091	4.59001	5.30644	5.56104	5.83576		0.326548
ABCA11P	0.238894	1.04663	0.668301	0.687316	0.965876	0.555548	-0.0740369	0.444934
ABCA12	1.40034	0.378992	0.586601	0.794968	1.88188	3.15053	-2.05107	0.842505
ABCA13						1.86621		0.7229
ABCA17P	0.0307842	2.87076	4.19019		4.20266	-1.75398	0.472806	-0.867278
ABCA2	-1.30205	-1.0773	-0.563507	-0.851936	-0.533329	-0.92109	-1.28237	-1.5664
ABCA3	-1.03219	1.4726	1.21436	0.841561	1.39077	0.368902	-0.0294377	-1.67567
ABCA4	3.01012	1.72069	3.59417	3.69429	3.37968	0.813599	1.75494	1.03112
ABCA5	3.08117	1.76904	1.60021	2.28475	1.37914	2.41492	2.38217	1.42139
ABCA6	3.3475	-0.0913123	1.47653	0.846837	1.95436		0.262632
ABCA7	0.474265	-0.31352	1.19147	0.26546	1.06636	0.721929	1.33146	-0.407502
ABCA8		-0.307876	0.692152	0.577997	1.85071		0.223381
ABCA9	2.08317	4.4655	5.70729	5.69335	5.29185		0.3311
ABCA9-AS1
ABCB1	0.374888	0.78217	0.538331	0.843173	0.814867	2.50464	0.808077	0.0677954
ABCB10	-1.24515	-0.43171	0.20963	-0.812275	0.199895	-0.500121	-0.563801	-1.07247
ABCB10P1
ABCB10P3								0.5647
ABCB10P4	0.523505							0.564598
ABCB11	-1.5272						-1.12471
ABCB4	-0.455296	0.357915	0.450414	0.758367	0.282569	-0.704301	0.228969
ABCB5	-0.891898						1.89799
ABCB6	-0.672543	-0.379412	0.00234971	-0.431366	0.0877526	-0.968033	-0.186581	-0.75527
ABCB7	0.230182	0.174891	-0.0738101	0.434974	-0.0664546	0.132296	0.519584	0.675488
ABCB8	-0.24473	-0.432188	0.369451	-0.031367	0.232844	0.396723	0.35371	-0.10786
ABCB9	-0.975174	-0.81098	-0.426645	-0.243134	-0.784586	1.08946	-0.262088	-0.743983
ABCC1	-0.904615	0.553352	0.0528003	0.330077	0.172027	-0.250793	-0.134571	-0.662661
ABCC10	-0.321034	0.0454557	0.346001	0.298028	0.183725	0.429775	0.322495	0.212338
ABCC11	0.225167	0.75573	1.28885	1.3732	1.44422	1.74846	0.814436	1.07698
ABCC12
ABCC13	-1.16341						-0.756603
ABCC2	-1.1966	0.259504	-0.486941	-0.0452556	-0.35542	0.58852	-0.54	-0.381887
ABCC3	-0.0611011	1.0048	0.787468	0.832989	0.901549	1.24403	0.396674	0.469425
ABCC4	-1.04902	-0.305159	-1.3175	-0.651199	-1.21579	0.130615	-0.599041	-1.21712
ABCC5	-2.21522	-0.555957	-1.25592	-0.942594	-0.976491	-0.410618	-1.47319	-2.16029
ABCC5-AS1
ABCC6	1.47287	1.18482	3.01035	2.49786	2.81478	0.600012	2.02753	0.912446
ABCC6P1	0.865157	0.688322	1.99674	2.07561	1.68852	0.689273	1.30797	1.2087
ABCC6P2	-0.644012	-0.445481	-0.343757	0.0662995	-0.557918	-1.01762	0.592182	-0.0829784
ABCC8								0.134979
ABCC9	1.10402					1.54998	0.405309
ABCD1	-1.99097	0.248106	0.141044	-0.0232442	0.222214	-0.689249	1.17558	-2.5537
ABCD1P2
ABCD1P3
ABCD1P4
ABCD1P5
ABCD2	-0.678339						1.56199	0.706387
ABCD3	-0.634021	-0.675632	-1.34043	-0.761752	-1.27464	0.132827	-0.414974	-1.57224
ABCD4	-0.0554996	-0.324241	0.401162	0.1618	0.353129	0.548358	0.626632	0.245218
ABCE1	0.153666	0.447304	-0.646863	-0.0588853	-0.479412	0.064348	-0.265005	-1.07451
ABCF1	0.257037	0.195103	0.278011	0.35538	0.343935	0.287332	0.218296	0.598268
ABCF2	-0.763706	0.0200707	-0.48612	-0.48867	-0.305648	-0.262687	-0.653327	-0.403745
ABCF2P1							0.593776	0.512494
ABCF2P2
ABCF3	0.121479	0.163992	0.980514	0.665523	0.916592	0.392284	0.773899	0.256019
ABCG1	3.49078						0.731179
ABCG2	-0.723409	0.218098	-0.74558	-0.146027	-0.924966	-0.403827	-0.824917	-0.491918
ABCG4	-1.91455	0.881327	2.47475	1.49745	4.10799		1.2633	-1.06453
ABCG5		0.383697	0.965514	1.00536	0.768888	-0.391327	0.0270944	-0.793925
ABCG8	-0.233177	0.0791825	-0.223147	0.431098	-0.0532303		-0.980366	0.484655
ABHD1	-0.252205	1.07452	0.7753	1.00808	1.63703	-0.218553	-0.636527	-1.66564
ABHD10	-0.740141	0.0778106	-0.487866	-0.219547	-0.952259	-0.845155	0.0256489	-0.311729
ABHD11	0.456311	0.0729494	-0.0183142	-0.0349971	0.123251	-0.256029	0.692793	-0.276575
ABHD11-AS1	0.943559			-1.29746	0.979021
ABHD12	0.443058	-0.349155	0.874227	0.0420565	0.789361	-0.0944697	0.237219	-0.124086
ABHD12B	-2.41084	-0.678474	-1.21909	0.922739	1.43389	-2.27394	-1.22747
ABHD13	0.596132	0.367919	-0.258263	0.154886	-0.139048	0.364082	0.676487	0.292071
ABHD14A	-0.747012	-0.103513	-0.755873	-0.414567	-0.936003	-0.804531	-0.57801	-0.68102
ABHD14A-ACY1	-0.291943	-1.59927	-0.197717	-0.873948	-0.419322	0.168687	0.117244	-0.315142
ABHD14B	-1.35313	-0.714337	-1.10615	-0.755258	-1.65222	-0.669228	0.0883958	-0.751852
ABHD15	-3.27899	-0.327274	0.278398	-0.581577	0.30532	-1.47875	0.0410051	-3.47958
ABHD15-AS1
ABHD16A	0.909794	0.298438	1.47257	1.23696	0.981764	0.717314	1.5083	1.49567
ABHD16B
ABHD17A	-0.83012	-0.540941	1.07402	-0.108544	1.01714	-0.387882	0.167605	-0.758983
ABHD17AP1	-0.0835141	-0.99166	0.46979	-0.76731	-0.007635	-1.85304	0.605188	-0.698452
ABHD17AP3	0.835599	-1.20705	-0.499457	-1.89826	-0.579514	-1.36772	2.59924	-0.258562
ABHD17AP4	1.5915	0.973809	3.41307	2.68215	3.33587	3.11138	0.90875	1.49679
ABHD17AP5	1.18398	0.288575	2.46269	1.22266	2.299	2.97245	4.29939	2.4711
ABHD17AP6		-0.43162	1.32138	0.899849	1.14239
ABHD17AP7
ABHD17AP8
ABHD17AP9
ABHD17B	1.0524	2.05112	2.57001	1.71581	2.45705	1.02534	0.770876	0.748752
ABHD17C	-0.28617	0.0453162	-1.33482	-1.50105	-1.18372	-2.34798	-0.548847	-0.900849
ABHD18	-0.0240441	0.397573	0.219577	0.55122	-0.133069	0.204074	0.329911	0.112672
ABHD2	0.259977	-0.751584	-0.679238	-0.448556	-0.700946	-0.322047	0.0373818	-1.18897
ABHD3	-0.685361	-0.616294	-0.571791	-0.387392	-1.00995	-0.467549	-0.258104	-0.800857
ABHD4	0.802958	0.565833	-0.455197	0.187544	-0.58489	0.452272	0.274867	1.08565
ABHD5	0.152493	0.602533	0.662675	0.755825	0.00938011	0.778687	0.816142	0.207029
ABHD6	-1.70607	-0.14962	-0.618823	-0.278199	-0.114913	-0.929202	-0.504267	-2.45899
ABHD8	-1.21718	-0.685218	-0.0834346	-0.432236	0.0633258	-2.11792	-0.643881	-1.52745
ABI1	0.540141	0.800187	-0.156901	0.552574	0.0655439	0.593931	0.559932	0.284567
ABI1P1
ABI2	1.07783	0.911764	0.395586	0.945196	0.290167	-0.790101	0.211511	1.13135
ABI3	-0.416931					0.80848	-0.761229	2.90872
ABI3BP	-0.0417368	0.733228	2.29756	-0.0381747	3.01875	-0.522637	-1.02744
ABL1	-0.386134	0.511943	0.139294	0.246153	0.340457	-0.100512	-0.26589	-0.113109
ABL2	0.405492	0.542169	-0.0537831	0.476573	-0.162984	0.610224	0.833695	0.924345
ABLIM1	0.93431	0.0400429	-1.32593	-0.441772	-1.25583	0.802637	0.95467	0.482457
ABLIM2	0.379345	0.792419	1.36804	1.55587	2.53762		0.713644	0.0237232
ABLIM3	0.450092	1.39263	2.31189	2.77654	1.56535	0.843044	0.421191	-0.210113
ABO		1.67619	-1.94644	-0.0680425	1.80536	0.264303
ABR	-0.779063	-0.204826	0.116363	0.046081	0.18685	-0.672552	-0.843477	-1.02675
ABRA		-0.0429998	-0.0500496	1.83217	2.86731			-0.727042
ABRACL	0.325829	-0.589524	-0.295532	-0.159415	-0.00660373	-0.506374	-0.746189	-0.597731
ABRAXAS1	-0.732604	-0.218893	-1.19915	-0.544123	-1.21612	-0.53976	-1.25387	-0.388699
ABRAXAS2	0.912109	1.11181	0.542402	1.1312	0.536547	0.826647	0.929397	1.00329
ABT1	0.417272	0.162534	0.0534112	0.354076	-0.0491717	0.465374	0.608328	0.4476
ABT1P1
ABTB1	-0.0907549	-0.401138	0.681286	0.134403	0.590632	-0.676853	-0.18024	-0.84286
ABTB2	3.66197	0.87334	2.12238	1.5388	1.93885	1.10852	2.47396	1.8416
AC000032.1
AC000035.1
AC000036.1	-1.68339
AC000041.1	0.675857	0.585012	1.95213	0.562082	0.939343	1.22295	0.601734	0.716705
AC000058.1
AC000061.1
AC000067.1
AC000068.1	-0.304181	-0.157788	-0.445833	-0.269992	-0.5103	-1.04593	-0.154542	-1.87416
AC000068.2	-1.97588	1.32205	-2.30207	0.282088	-2.23876	0.820441	0.915922
AC000068.3
AC000077.1
AC000078.1	-0.880417	-0.376725	-0.787566	-0.217819	-1.69581	1.22519	0.548273	-0.320884
AC000081.1
AC000089.1	0.211941	-2.10695	2.96362	-0.172981	1.40936	-1.89006	-0.928813	-0.430745
AC000095.1
AC000095.2							-0.511882
AC000099.1
AC000111.1
AC000111.2
AC000111.3
AC000120.1	0.399048	-0.602465	-0.544446	0.562844	0.442928	0.397006	-0.617321	-1.19011
AC000123.1	-0.128856	1.44017	-0.903114	0.927365	-1.78629	-1.36962	-2.79454	-0.667553
AC000123.2	-1.71513	0.670067	0.635617	0.55943	-1.40729	0.532699	-3.03485	-1.4351
AC000123.3	-0.381341	0.0589748	-2.20014	-0.832172	-1.99096	-1.15408	-0.424509	-1.08113
AC000124.1
AC000362.1
AC000367.1
AC000372.1
AC000374.1
AC000403.1					2.76702
AC001226.1
AC001226.2	0.259451	2.88911	1.84729	1.66389	2.84902	-0.681824	-0.195021	-0.296982
AC002044.1
AC002044.2		-2.23468	-1.3858	-0.901948	-0.251956		0.841582	0.377569
AC002044.3
AC002056.1	-0.0955936	-0.474934	-0.0150157	-0.46212	-0.413848	0.750603	-0.0598989	-0.889795
AC002056.2		0.778561					-1.7593
AC002059.1	2.83475					3.73354	1.72378	3.7879
AC002064.1		1.68734		0.38868	0.576839		0.962193
AC002064.2					-0.535175			2.69927
AC002064.3		4.71064			4.78198
AC002066.1
AC002069.1
AC002069.2
AC002070.1	0.913014	-0.2845	2.85719	0.716222	2.60232	1.05062	0.433031	1.32703
AC002075.1
AC002075.2	1.85221	-0.119608	1.02803	0.600566	1.46215	-0.881485	-0.891033	-1.8421
AC002076.1	-1.20052					1.13317	-0.817233
AC002076.2
AC002090.1
AC002091.1
AC002091.2
AC002094.1	1.92599	0.683479	1.79253	1.64937	2.32174		-1.18601	1.7983
AC002094.2
AC002094.3								1.14049
AC002094.4	3.7781	0.673923	1.13284	-2.1668	-0.689831	-0.599183	-2.07278	0.525642
AC002094.5	0.40935	0.277911	0.188057	1.28791	0.0545138	-2.27501	1.01794	0.835662
AC002101.1
AC002115.1
AC002115.2
AC002116.1	0.186332	0.286171	-0.308081	1.87919	0.844753		-1.80285	1.69645
AC002116.2	0.36757	-0.23798	0.094954	0.0444254	0.118918	-0.0796387	0.176921	0.042513
AC002127.1
AC002127.2
AC002128.1	0.0810966	0.282171	-0.758072	0.222026	-0.492421	0.332172	1.54546	-0.246012
AC002128.2	0.563285	-0.210429	0.528858	0.413857	0.157121	-1.56014	1.20444	0.569601
AC002306.1
AC002310.1	-1.63795	-0.290734	-1.30412	-1.52253	-0.967096	-0.843589	-0.852117
AC002310.2	-3.31912	-2.0803	-0.281509	-0.871506	-1.13534		-0.770641	-4.29157
AC002310.3		-1.16838	-2.11112	-2.14485	0.579614		0.692953
AC002310.5		2.04002	5.02799	2.36244	4.83875		0.459679
AC002310.6	-0.591273	-0.339368	1.06886	0.268537	0.988389	-0.34182	1.43826	-0.765192
AC002347.1	-1.53249	2.74316	2.4136	3.14409	3.50881	-1.60293	-0.579815	-2.93194
AC002347.2
AC002350.1	-0.211848	-0.185509	0.18442	0.542427	-0.01772	-1.16813	-0.987619	-0.962354
AC002350.2	0.757188	-0.208363	1.10928	0.415943	1.15644	0.455267	1.20076	-0.444322
AC002351.1
AC002366.1
AC002367.1
AC002368.1
AC002375.1
AC002378.1	2.80489
AC002381.1
AC002383.1
AC002384.1
AC002386.1
AC002398.1	0.187953	0.340548	0.84425	0.475989	0.684929	-0.531864	-0.18341	0.324537
AC002398.2				-1.00278				2.92851
AC002400.1	0.506585	0.418777		-0.655177	1.38108			-0.383781
AC002401.1	0.119595
AC002401.2	-3.47868	-1.99089	-2.6892	-1.52153	-1.54887	-1.21616		-1.79043
AC002401.3		-2.05328	-3.34063	-1.93428	-3.10027
AC002401.4
AC002407.1
AC002428.1
AC002428.2
AC002429.1
AC002429.2		2.06382	1.97084	-0.417655	4.38459		1.93651
AC002451.1								0.71934
AC002451.2		0.558552		-0.0272908	2.75232
AC002454.1	1.9792	-0.117934	-0.282174	0.264891	-0.779002	-0.667723		-0.36767
AC002456.1	2.0971					-2.03679	-1.57836	0.925277
AC002456.2
AC002460.1
AC002463.1							0.697953	-1.96887
AC002464.1
AC002465.1
AC002467.1	0.65823	0.957403	1.19981	1.35746	1.03984	0.409308	0.303295	0.723169
AC002470.1	-1.48872	0.0541463	0.127401	0.0901015	-0.760732	0.981771	2.03336	0.282894
AC002472.1
AC002472.2
AC002472.3	4.10042						2.68114
AC002472.4
AC002480.2	0.512674					0.648632	1.72843
AC002480.3	0.185783						-0.0342048
AC002486.1							3.36014
AC002486.2
AC002487.1
AC002504.1
AC002511.1
AC002511.2							1.40716
AC002511.3
AC002519.1		1.98053	1.60346	1.92153	2.04993	0.60651	-0.721718
AC002519.2	1.83238							2.1863
AC002524.1	-0.214881	-0.96048	-0.761394	-0.940712	-0.869871	-1.03382	-0.0137913	0.397548
AC002525.1
AC002540.1						-2.30594	-2.60196
AC002542.1
AC002543.1
AC002545.1
AC002546.2
AC002550.1	-0.0675809	-1.13263		-5.62028	-2.62306
AC002550.2	-2.64261	0.00559586	-1.47574	-0.793472	-1.27416	-2.44892	-1.82638	-3.71225
AC002551.1
AC002553.1	0.231331	-0.670421	-3.21858	-0.160505	-3.88716	-0.87437	0.482342	-0.256911
AC002553.2
AC002553.3	0.789044	1.01397	0.28282	0.826546	0.995656	0.00781325	1.66308	-0.379052
AC002553.4	-0.142073	0.593852	0.244419	0.36943	-1.03544	-0.766707	-0.720726	1.28963
AC002558.1	0.180426	-1.68655	-6.88919	-1.01975	0.130317	-0.907845	-5.26697
AC002558.2				-0.783524		-1.75584
AC002558.3	2.09921	2.05539	0.90865	0.046	2.17733			-0.748697
AC002563.1	-0.772489
AC002984.1				-0.582885	0.644651
AC002985.1	0.0888402					-0.826915	-0.019711	1.23662
AC002985.2	-1.01149	-2.27668	-4.00292	-1.08015	-0.287026		-2.25077	-1.11803
AC002996.1
AC003001.1
AC003001.2
AC003002.1	1.40344	0.644311	0.848165	1.39388	0.256812	0.828643	1.60228	1.2114
AC003002.2	2.78501	0.470775	2.36488	2.06792	2.56287	0.487931	2.01217	1.13071
AC003002.3	-3.5689	-2.62227	-4.72111	0.144553	-4.33618		-2.66922	-3.09494
AC003002.4	-2.31193	-1.92369	1.05795	-0.229224	0.592642	-0.0243934	1.2131	-1.98138
AC003005.1	-1.83807	1.37016	-1.51288	1.68219	0.416597	-3.56711	-0.0263779	0.550491
AC003005.2	0.834314	1.7909	1.38041	2.04804	1.69289	-1.29356	0.13661
AC003006.1	-0.274774	-1.77538	2.02514	1.67995	1.7945		1.93175
AC003009.1
AC003029.1						0.907569
AC003035.1
AC003035.2
AC003043.1
AC003045.1
AC003070.1	0.432249	-1.11311	0.40934	-1.29897	-0.100805	-0.938484	-2.0896	-0.573285
AC003070.2	1.78499	-0.458825	-1.10054	-1.26758	-0.363755		2.09764
AC003071.1		-0.075565	3.05818		1.98517		-2.42741
AC003071.2
AC003072.1				-0.94596	-0.300364		1.20549	-2.85503
AC003075.1	0.706781	1.46324	0.59806	1.64721	1.4409	-1.70968	0.630809	-0.278786
AC003080.1	-0.0188432
AC003084.1
AC003087.1
AC003092.1								0.675959
AC003092.2
AC003098.1
AC003101.1
AC003101.2	0.17697		-0.112685				0.579205	-0.357549
AC003101.3
AC003102.1	-1.47658	-0.740632	-0.43123	0.707392	0.321097	-2.42131	-0.203733	-1.36001
AC003102.2	3.6557	-0.387924	1.2196	2.10558	1.83994	-2.74603	-2.04091	-0.656466
AC003659.1			-1.53401		1.9015
AC003666.1
AC003669.1
AC003681.1	0.682091	0.610502	0.621099	0.368703	0.720958	1.00577	0.582097	1.42841
AC003682.1
AC003684.1
AC003685.1
AC003685.2
AC003686.1
AC003687.1
AC003688.1
AC003688.2
AC003956.1	-2.08893	-2.68572	-2.4994		-2.29743			-1.25386
AC003957.1	-0.870834	2.23562	2.53649	2.86236	2.19153	-0.651013	-0.034059	2.80044
AC003958.1
AC003958.2			0.700211		4.76751
AC003965.1	1.62463	0.41893	-0.755353	0.29686	-0.227771	-1.99612	2.44138	1.16943
AC003965.2						-1.2754
AC003973.2								0.257361
AC003973.3						0.525931		-0.62918
AC003975.1
AC003982.1		-0.293527	-0.45657
AC003982.2
AC003984.1								-0.302239
AC003985.1
AC003985.2			3.21257		2.90991
AC003986.1
AC003986.2
AC003986.3
AC003988.1
AC003989.1
AC003989.2							2.33994
AC003991.1							0.629106
AC003991.2
AC003992.1							-0.746871
AC004000.1		-1.90467		-4.6315	0.132823
AC004004.1
AC004006.1
AC004009.1
AC004009.2							-0.901763
AC004009.3
AC004012.1	-0.939359	2.6128	2.45777	3.58067	4.23453			-0.956515
AC004014.1
AC004014.2		0.968599	3.05466		4.14173
AC004022.1		-2.94528	-0.054193	0.507703	0.595691		1.24969	0.939358
AC004022.2	-3.94777							-1.02142
AC004023.1
AC004024.1		1.43927	-0.255654	1.4984	1.3481		1.58121
AC004034.1	-2.66155	-1.82005	-0.72285	-0.0510929	-1.21954	-1.8399	-3.17257	0.420441
AC004039.1	0.173705	-0.431894	-1.36627		-0.611406		-1.63539	-1.73703
AC004052.1
AC004053.1
AC004054.1
AC004057.1	-0.793578	0.00132668	-1.10884	-0.259456	-0.992917	-0.396539	-0.951443	-0.288761
AC004062.1
AC004063.1
AC004066.1
AC004066.2	-1.72781
AC004067.1	-3.78881	-2.10331	-0.922056	-2.08881	-3.79173	-4.06063	-2.31425	-1.7704
AC004069.1	0.714152							-0.783732
AC004069.2
AC004074.1
AC004076.1	0.277465	0.777641	-1.36471	0.90458			1.31216
AC004076.2	-3.55744	-0.724991	-3.10456	-2.66643	-2.07674	-2.36076	-1.8428	-3.58849
AC004080.1						-0.25865	-4.59894
AC004080.2						-1.08707	-3.78979	-1.35293
AC004080.3	-2.62899					0.182725	3.37669
AC004080.4						3.39354
AC004080.5						2.61609
AC004080.6
AC004112.1	-0.304157						-0.493223	-0.0448782
AC004129.1	-0.532571
AC004129.2
AC004130.1	1.9889						4.08096
AC004134.1	-2.68913	-2.15341	3.69055	1.55606	3.20934	1.64306
AC004147.1
AC004147.2
AC004147.3
AC004147.4
AC004147.5
AC004148.1
AC004148.2	-0.345142	-0.551358	-0.385438	-0.64826	-0.560526	-0.546884	-0.14768	0.475102
AC004149.1	-2.75613						-2.96865	-0.813971
AC004156.1	2.85444	1.8652	4.67481	4.18174	4.21677		1.82865	-3.70885
AC004158.1							1.09493
AC004160.1			0.17745	1.18704	3.91183
AC004160.2
AC004217.1		1.46237	0.93867	0.652592	1.08316	-0.524544	1.54791	1.73563
AC004217.2
AC004217.3
AC004221.1	-0.238081	1.56683	2.19354	2.00211	2.74263	-1.88715	1.07134	-0.905812
AC004223.1		-0.771701	-0.951286
AC004223.2								0.0730224
AC004223.3
AC004223.4	2.27891	1.53173	0.701421	1.48853	-0.86293	0.42733	-0.90454	1.27982
AC004224.1	-0.0188484			-4.31059	-1.68135		2.17741
AC004224.2		-0.139791
AC004231.1	-0.681963	0.172305		-1.25484		-0.321429		-1.57991
AC004231.3
AC004232.2								2.77866
AC004232.3	-0.853706	-0.203149	-6.02039	-1.33509	-2.35134		1.38316	-1.34718
AC004233.1	0.380763	1.9372	0.594243	1.09179	1.22841		2.64844	0.484505
AC004233.3	1.2153	1.52093	0.923347	1.35074	1.40546	0.992436	1.99044	0.335247
AC004233.4	-1.27767	0.982929	1.07322	1.37714	1.08742	0.137227	-3.14937	-3.06477
AC004241.1	0.0400028	1.28733	1.35781	1.23195	1.54369		0.459813	-0.302433
AC004241.2		0.61603	-0.885557	-0.976273	0.624915		-1.53728	-0.723599
AC004241.3	1.89085	0.0138162	-0.642631	-0.702591	-2.59163	0.349521	0.562276	0.482621
AC004241.4						-3.5382
AC004241.5	-1.0745	-2.40378	-0.177867	0.232157	0.3005		-1.02564	-0.883449
AC004253.1	-0.80508	-0.67373	-2.07744	-1.41044	-1.3722	-1.66279	-0.539234	-1.51238
AC004253.2
AC004257.1
AC004263.1					3.60604
AC004263.2	-1.24495	1.20444	1.35613	1.47716	2.09103	2.57345	-0.842105	-0.155998
AC004264.1	2.31874	0.668222	1.92119	1.08674	1.64096	2.60832	-0.491208
AC004264.2
AC004381.1	-2.7175	1.69744	0.658071	1.8951	0.701827		1.94481
AC004381.2	-0.616808	0.0139878	-0.89828	-0.306734	-1.20852	0.709859	0.687385
AC004383.1		-1.65385	-3.56218	-1.16702	-2.4119	-3.6404
AC004386.1
AC004386.2
AC004408.1
AC004408.2	-1.99798						0.358914	-0.557252
AC004415.1
AC004448.1	-0.739371	-0.671867	-0.307016	-0.445003	-0.306338	-0.435727	-0.598227	-0.541593
AC004448.2			-0.30371	-3.39544	-1.97725		2.28699
AC004448.3
AC004448.4							-4.19356
AC004448.5
AC004449.1	0.308191	-0.273397	-0.0424629	-0.678921	0.546734		0.513912
AC004453.1	-0.545317	-0.185554	-0.605061	0.182231	-0.485751	-0.559513	-0.598915	-0.435495
AC004453.2		0.296777	1.74317	0.697824	2.16223
AC004461.1		0.939492	0.620116	0.225926	2.2954	4.77104
AC004461.2	-0.559354	0.366681	-0.43924	0.623516	-0.72427	-0.565734	0.697405	0.337963
AC004466.1	-0.268666	-0.468598	-0.582034	-2.23387	0.265541	-0.740277	0.237941	-0.137466
AC004466.2	-0.257151	-0.965468	0.777406	-1.68135	0.431226	0.598885		-1.52916
AC004466.3	2.11859					-2.46586	-1.51806	-0.993713
AC004467.1
AC004470.1
AC004471.1	1.03428	-2.23894	-1.50976	-1.58394	-1.54016	1.20336	0.974883	-0.232445
AC004471.2	1.43606						-0.115556	0.463615
AC004477.1	1.0641	-0.40799	0.178259	-1.02007	0.580101	1.09579	1.19107	0.57231
AC004477.2
AC004477.3	-1.28065	-2.28752	-3.42644		-2.26588	-2.23416	-1.6374	-1.54122
AC004485.1
AC004486.1
AC004490.1	-0.776696	3.80558	4.94774	5.35827	5.29522			0.456862
AC004491.1					2.49165
AC004492.1	0.738745		-3.38164	-2.484	0.342462	0.553742	1.30897	1.64296
AC004494.1	0.566456	-0.474738	1.45045	1.91249	0.991733		0.391525	1.42561
AC004494.2
AC004522.1					-0.609748
AC004522.2							-0.221442
AC004528.1
AC004528.2	-0.203183	-1.11385	1.74338	0.0884068	1.3193	-1.07492	0.802042	-1.51441
AC004534.1
AC004540.1							0.776706
AC004540.2	-2.28747	-0.341194	-1.04265	-1.21518	-2.93793	-0.56199	-2.02625	-0.938309
AC004542.1
AC004542.2
AC004543.1
AC004551.1
AC004552.1	0.0364098	0.24346	0.558348	0.840131	1.22935	-0.506197	-0.554769	0.0630957
AC004554.1
AC004554.2
AC004584.1	-2.12486
AC004584.2
AC004584.3
AC004585.1		1.70848	-0.821433		2.73684
AC004585.2
AC004590.1
AC004593.1	0.0252803	1.3742	2.68176	3.2656	1.19961		1.84977
AC004594.1		1.76023	2.21927	-0.673484	1.90046		-0.732765
AC004596.1	-0.023475	-0.246561	1.2742	0.129973	1.5047	-1.24753	-0.805916	-0.468353
AC004597.1
AC004623.1	-4.30095	-0.404295	0.2014	0.630994	0.805841	-3.77336	-1.68129	-4.06981
AC004637.1	-1.41689							0.971379
AC004672.1
AC004672.2
AC004674.1					1.55885			-0.243138
AC004678.1	-2.92578	0.649896	-2.02175	-2.26729	-0.422922	-1.62396	-2.39512	-0.312188
AC004678.2	-1.01369	1.45772	-1.63381	1.32915	0.155981	-0.425474	2.28487	-0.522443
AC004686.1	1.78339	-0.993846	-0.89744	-0.427059	0.156572	5.72598	1.16587	1.4161
AC004687.1							-1.46049
AC004690.1
AC004690.2						-2.39133
AC004691.1
AC004691.2
AC004692.1
AC004692.2					1.81494
AC004696.1
AC004696.2
AC004702.1
AC004704.1							2.25602
AC004706.1	0.0595829	-0.159009	-0.548899	-0.534885	-0.817804		-0.506473	-3.4636
AC004706.2
AC004706.3	-0.852444	-1.23323	-0.474921	-0.952383	0.11796	-0.26972	-0.670727	-0.902476
AC004706.4	1.10173	1.68752	2.44034	1.62377	2.71239	1.95552	2.14907	1.05477
AC004707.1	-0.553148	0.665269	2.76152	0.11041	3.23931	0.709511	0.336878	0.798173
AC004771.1	1.98486	1.46368	1.71804	1.13252	2.09978		1.24123	-0.399337
AC004771.2		0.509086	-0.291292	0.318628	-0.871474		-0.906347
AC004771.3	-1.59765	-2.29398	-2.60459	-1.58901	-0.762222	-2.36021	-0.694775	-1.89175
AC004771.4								-1.57647
AC004771.5	-1.03494	0.317751	-0.146325	-1.41187	-0.256938	-1.14484	0.492145	-0.129108
AC004775.1
AC004777.1	1.20948
AC004784.1
AC004790.1
AC004790.2
AC004792.1		4.66822	-1.57634	-0.188256
AC004801.1
AC004801.2	2.77464	1.37529	1.52971	1.36607	1.98433	3.21875	3.45834	3.24374
AC004801.3
AC004801.4		2.42472	3.2694	3.21352	3.33218
AC004801.5						0.638563
AC004801.6	-0.382824	2.57631	1.21785	2.12811	1.91886	-0.948622	-0.285444	1.01288
AC004801.7
AC004803.1	-2.35173	0.0118847	-0.491637	0.00547578	-0.379818	-0.889292	-0.145095	-2.22084
AC004805.1	-0.461731	-1.54903	1.45351	0.227691	2.33852	2.2387
AC004805.2
AC004805.3
AC004808.1
AC004808.2
AC004812.1
AC004812.2	-1.9472	-0.1786	-1.63002	-1.72453	-1.16017	-1.93267	-2.55096	-1.22359
AC004815.1
AC004816.1	1.88258	0.787176	0.807352	1.69502	0.9251	1.06405	3.14282	1.01588
AC004816.2
AC004817.1
AC004817.2
AC004817.3						-1.28408
AC004817.4
AC004824.1
AC004825.1
AC004825.2	1.97466	1.08363	0.495557	1.25985	0.673122	0.676219	1.10909	2.69337
AC004828.1
AC004830.1	1.21599	0.5658	-0.185334	0.516581	-0.28029	0.210305	0.159911	0.900739
AC004832.1
AC004832.2
AC004832.3							-0.71786
AC004832.4	-1.68754	-0.737093		-1.0056	-1.9198		-0.78565	-1.44079
AC004832.5	-2.63798	0.137004	-2.29903	-1.36815	-0.332609		-1.78725	1.47123
AC004832.6		0.520225	0.106193	-1.13174	0.321669	-5.80087	-2.43312	0.373226
AC004834.1	-1.58435	0.411865	2.59598	1.12497	3.49017	1.0714	-1.71887	-2.43459
AC004835.1	-2.79645	0.532287	1.77668	0.938583	0.350087	2.22499	1.05674
AC004835.2
AC004836.1		-1.45564		-1.95261	0.701987		-1.12113
AC004837.1	-2.59912	3.23066	2.6984	1.52951	1.5759	-0.295882	-0.997475
AC004837.2	0.753381	-0.397137	-2.48635		-2.24709	0.82142	0.123011
AC004837.3
AC004839.1	0.771776	0.90369	1.45232	1.28479	0.54668		0.294807	0.551183
AC004840.1		1.57892	0.907557	0.288427	1.93477	-1.27176	0.395332	-1.15024
AC004840.2
AC004846.1	-0.947849						-1.92789
AC004846.2	-1.16712	0.112479	1.1134	0.440674	1.67678	-1.6887	-0.650958	-0.0432622
AC004847.1
AC004852.1
AC004852.2			-5.65486		0.463621
AC004852.3
AC004853.1
AC004853.2
AC004854.1
AC004854.2	1.98813	3.03637	4.11472	3.29129	4.16853		-2.13769	3.08727
AC004858.1
AC004862.1
AC004865.1
AC004865.2	-3.58163	-0.105485	1.65891	-0.106393	1.64774		-1.20768
AC004866.1
AC004866.2
AC004869.1
AC004869.2
AC004870.1
AC004870.2
AC004870.3
AC004870.4
AC004872.1
AC004875.1
AC004877.1	-2.65124	2.42046	5.47505	2.87773	5.01606		1.47512	1.43496
AC004877.2	0.625738		-0.120945	-1.68427	0.191365		0.322045
AC004882.1
AC004882.2
AC004884.1
AC004884.2	0.320361	0.334393	-2.23046	-0.879139	-2.3901		-0.298579	-0.31935
AC004888.1
AC004889.1	-0.0443194					0.0580712	0.480266	0.0370883
AC004890.1	-0.746547		3.48933	0.900214	2.97334	-2.01455	1.19469	-0.721352
AC004890.2	-0.730415	-0.55448	-0.402337	-0.0100137	-0.273659	-0.133403	1.00181	-0.253067
AC004890.3	-2.6711	-2.41179	-1.02009	0.174285	-1.56383	0.797007		0.277773
AC004893.1							0.370356
AC004895.1	0.670894	0.364302	0.698143	0.989531	0.574265	-0.485401		-0.710154
AC004898.1	1.97972					0.520657		0.15815
AC004899.1
AC004899.2
AC004906.1
AC004908.1	-1.8751	-0.899959	-0.775616	-1.98264	-2.01643	-0.561189	-1.36204	-2.20186
AC004908.2	-3.23254	0.00121481	-1.49538	-0.872336	-1.92924	-1.58673	-0.943299	-0.591144
AC004908.3	-0.923396	3.35028	0.0377791	-4.40176	1.94332	-5.47951	0.352409
AC004910.1
AC004911.1
AC004917.1
AC004918.1	-1.34952	-0.155212	0.245485	-0.463686	-0.901506	-0.196544	-0.957175	-0.579748
AC004918.3	-0.918808	-1.12015	-1.87493	-1.89486	-2.70823	-2.02997	-0.95486	-0.883918
AC004920.1
AC004921.1		-0.769596	-1.05455	0.69351	0.32427
AC004922.1	-3.79198	-2.57314	-2.68015	-0.820021	-3.01601	0.559903	-2.29045	-0.231951
AC004923.1						0.134754	2.96869	3.89378
AC004923.2
AC004923.3
AC004923.4	-1.42343	-0.987422	-1.05406	-0.349073	-0.446479	-3.37201	1.22534	-0.912849
AC004924.1
AC004925.1	0.455909						4.13473
AC004930.1
AC004936.1
AC004938.1
AC004941.1
AC004941.2		-1.58898	-0.309263	-0.393746	-0.301743
AC004943.1	0.731775	0.405027	-1.29171	0.477187	-0.340536	4.0431	0.494602	0.460734
AC004943.2	0.522921	0.0519603	-0.188773	0.159187	-0.046649	0.392662	0.605842	0.177078
AC004943.3		-4.71362	-0.849879	-1.06288	-0.586072		-0.0596761	-1.05874
AC004944.1
AC004945.1
AC004946.1
AC004947.1
AC004947.2
AC004948.1	1.72251	0.396167	0.616912	0.817247	0.474942		-0.0603296
AC004951.1	0.157461	-0.149884	0.694572	0.899304	1.30684	0.330033	1.5948	0.72238
AC004951.2	1.47614	1.66826	1.59191	2.30915	1.62325	2.43553	1.56156	1.1867
AC004951.3	-1.19614	-1.05388	2.0976	0.27626	1.54771	-1.1163	1.16149	0.136643
AC004951.4	-0.153192	1.24444	3.02583	2.232	1.43324		-1.15841	-0.106013
AC004965.1
AC004967.1	2.61301	3.1644	4.62902	2.95618	4.29232	5.5061	4.08968	0.546477
AC004969.1
AC004972.1
AC004973.1
AC004975.1	-0.463808	1.76235	-1.48565	-0.456418	-0.63848	-1.02876	-0.648257	-1.6265
AC004975.2		0.556162	-2.54506	1.97989		-1.4407
AC004980.1	-0.556856	0.6245	0.766876	0.253603	1.2366	-0.232865	-0.202044	-0.554495
AC004980.2	-0.240095	1.39677	-1.68241	0.0952623	-3.08855	-0.139318	-0.252971	-0.810161
AC004980.3
AC004980.4
AC004982.1	2.23049	0.545723	0.525257	1.8864	1.14148	3.32746	3.53123	2.55056
AC004982.2	1.08482	0.796674	1.07589	1.24906	0.850196	2.3725		2.05292
AC004986.1
AC004987.1	-5.45727					-0.824883
AC004987.2	0.37558	0.361436	-1.00291	-0.334203	-0.12971	-0.11699	0.643946	1.57887
AC004987.3							1.49808
AC004987.4	5.68518
AC004988.1
AC004990.1	1.32695					1.43913	-0.878687
AC004994.1
AC004997.1	2.10409	7.90377	7.06837	7.63136	9.26124	-3.31509	0.172947	0.462817
AC005000.1	-0.505854	-0.0793389	-1.03222	-0.297859	-0.544389	-0.895693	-0.631053	-0.0525163
AC005000.2
AC005002.1
AC005002.2
AC005005.1
AC005005.2
AC005005.3	1.72116	2.02951	2.15224	2.02441	2.81065	-0.813549	0.828722	0.787023
AC005005.4	6.5244	1.65539	1.25081	1.45769	2.69191	-1.20427	1.67847	-3.43083
AC005006.1	1.75674							4.42238
AC005008.1
AC005008.2
AC005009.1
AC005009.2						0.393335	3.25549
AC005011.1
AC005013.1
AC005014.1			2.08815	1.44384	2.54633		-1.18099	-2.02104
AC005014.2	-0.869759		-0.109216	-0.189712	-0.782265	-1.61933	-1.01668
AC005014.3	0.101885
AC005017.1
AC005019.1
AC005019.2
AC005020.1	-2.0886	2.80173	0.556795	3.10041	0.433964	-0.738347	-1.83677	0.445227
AC005020.2	0.881967	-0.576479		-0.608134	-2.31054	-0.549043
AC005021.1	-1.30565	1.60123	-2.18038	-1.461	1.27877
AC005033.1
AC005034.1
AC005034.2	2.25678	2.43395	0.669595	2.28709	1.16903			2.42857
AC005034.3	3.27648	2.30832	2.69451	2.19734	2.8682	0.122307	-0.845564	3.20858
AC005034.4	-0.523372	1.09306	0.53709	-0.22375	1.51528		1.27252	0.876994
AC005034.5	-1.28448	0.596386	-1.42266	-0.282544	-2.54034	-0.979387	-1.98043	-0.547856
AC005035.1						-0.0112498	-1.40055
AC005037.1	-0.295784	0.0411023	-1.0238	-0.160845	-1.32591	-0.921154	0.0392208	0.618887
AC005040.1
AC005041.1	-4.14792							-5.51061
AC005041.2
AC005041.3	-1.44364	-0.820287	-1.99693	-1.18397	-1.4282	-3.32572	-0.0150448	-0.861812
AC005042.1	2.14178	2.49311	2.91857	3.72791	2.67263	1.61069	3.06251	5.11943
AC005042.2
AC005042.3
AC005046.1	-0.52327	1.28023	0.533839	1.27237	0.154497	0.17704	0.116686	-0.943716
AC005050.1
AC005052.1		-0.443266	-1.01312	-1.21733	-0.237298			-1.25933
AC005056.1		0.586983	-0.379227	2.07313	0.326578
AC005062.1								-7.31393
AC005064.1			-2.30134	-2.00323	-1.12463
AC005066.1
AC005070.1
AC005070.2	-2.60259						0.175264
AC005070.3	1.35857	0.156759	-0.0430325	0.488928	-0.420547	0.106919	0.641585	0.312912
AC005072.1	-0.711006					-3.48906	-6.08068
AC005076.1	0.848744	-0.748131	-0.12135	0.0652592	-0.0217626	0.15358	0.521338	0.515586
AC005077.1		-2.36283		1.55599	-0.015383	0.102149	0.713541
AC005077.2	0.38557	-0.0186456	1.72472	1.06811	1.66704	1.95495	8.17131	-1.62647
AC005077.3
AC005077.4	-1.06258	0.902186	0.832525	1.12115	1.36957	2.49154	-1.14895	-0.959918
AC005082.1
AC005083.1
AC005084.1
AC005086.1	0.442931	0.961864	-0.806337	0.54503	-0.533042	1.13396	-0.38519
AC005086.2
AC005086.3		1.67555		1.63447	2.08217
AC005086.4	5.00366		1.31518
AC005088.1
AC005089.1	0.251183	-0.744305	-0.520323	-0.373378	-0.173902	0.0191438	-0.700502	-3.4618
AC005090.1
AC005091.1
AC005094.1
AC005096.1			1.47829	0.335841	1.77733	-1.04741
AC005099.1						-1.07168		1.63804
AC005102.1
AC005104.1	-0.283392	-0.89481	-0.306342	-0.461647	0.120923	-0.850274	-0.794747	-1.272
AC005104.2	-3.66621	3.13142	2.70182	2.57359	1.38302	0.664192		-0.405433
AC005105.1
AC005144.1
AC005150.1								2.17845
AC005154.1	-1.38492	-1.49069	-1.50585	-0.932018	-1.04455	-1.70064	-1.54618	-1.08252
AC005154.2	-1.32521	0.868212	-0.609108	0.62637	-1.74696		-0.832344
AC005154.3	-3.37511	-3.26021	-1.20675	-0.494087	-0.585567	-0.700311	-3.66933
AC005154.4
AC005154.5			-0.181846					-0.779672
AC005154.6
AC005156.1
AC005160.1
AC005162.1
AC005162.2
AC005162.3		-0.620916	-0.132325	0.0427142	0.219415	0.46923	-2.00875
AC005165.1	-0.0140939						-1.37058
AC005165.2
AC005176.1
AC005176.2
AC005178.1
AC005180.1	1.19025		2.24639	2.22343	3.32457		-1.47199
AC005180.2	0.97158					-0.0610703	-1.60776	2.59021
AC005181.1
AC005183.1	-1.29366		-1.33934		1.87309		-1.08702
AC005185.1
AC005189.1
AC005191.1
AC005197.1	-4.07034	1.98341		0.404522			-1.0049
AC005208.1							1.0114
AC005209.1
AC005220.1
AC005224.2	-0.417852	-0.874452	-0.334884	-0.304453	1.11262		0.160932
AC005224.3	-1.95972	0.219209	-0.352413	-0.103004	0.309532			1.19212
AC005224.4	-0.110838	-2.25005	-2.80398	-2.71541	-2.37391	-3.51758	-0.614201	-0.618168
AC005225.1
AC005225.2	-0.119167	-0.0951498	-1.10159	0.406181	-0.229821		1.32382	1.00488
AC005225.3	-3.78381	-0.133384	-2.19262	-2.13027				-4.62208
AC005225.4
AC005225.5	-1.69332	-0.95478	-1.03628	-0.476061	-1.43381	-0.0246128	-0.616648	-0.0416149
AC005229.1			0.790418		1.90071
AC005229.2
AC005229.3
AC005229.4	-0.187596	1.12751	2.27711	1.3349	2.17878	0.123056	0.625779	0.279111
AC005230.1
AC005234.1
AC005237.1							-0.628837
AC005237.2
AC005242.1
AC005244.1						-0.496658	1.09254	2.77275
AC005244.2
AC005252.1
AC005252.2
AC005252.3
AC005253.1	-0.348501	-1.10943	-1.69428	-2.3971	-2.03968	-1.43615	-1.52016	-0.296684
AC005253.2
AC005255.1
AC005256.1		2.24884	2.11247	3.55687	3.78463	0.909057
AC005258.1
AC005261.1	-0.521553	0.226233	-0.00400971	-0.46817	0.475807	-2.30188	0.831034	0.650775
AC005261.2	0.410627	1.1924	0.319908	0.780867	0.189923	-0.110682	0.302355	-0.123727
AC005261.3	-0.632084	0.122538	1.3924	0.710079	1.0123	1.11836	0.477738	0.989675
AC005261.4	-3.16505	-0.259457	-1.75846	-1.77444	-2.55183	-2.06109	-3.51539	-1.89107
AC005261.5
AC005261.6	1.97828	1.41362	0.418905	2.3418	0.401296	-3.76135	1.50804	-0.10919
AC005262.1
AC005262.2
AC005264.1
AC005274.1		-0.130001		-1.61861		-2.86825
AC005277.1
AC005277.2						-5.12766
AC005280.1	-1.43454	1.23106	0.0901267	1.79505	0.962836		0.332658	-0.387955
AC005281.1						3.48648		-0.435936
AC005288.1	-0.0833525	1.11816	0.442505	1.84233	1.06394		3.8129	-0.267868
AC005291.1
AC005291.2
AC005294.1
AC005296.1
AC005297.1
AC005297.2
AC005297.3
AC005300.1
AC005301.1
AC005303.1
AC005304.1		1.79075	-0.15587	2.17119	0.0918325		-1.48125
AC005304.2
AC005304.3	-2.32369	-0.195234	-0.609303	-0.435748	-0.524793		0.0490424
AC005306.1	1.02172	1.6401	1.99876	1.54534	2.48392	-0.658473	0.373654	-0.250168
AC005307.1
AC005323.1
AC005323.2
AC005324.1							-1.58928
AC005324.2
AC005324.3	3.0144	2.40306	3.1642	1.54905	2.85815		-0.446276	-1.74846
AC005324.4	-0.450586	-0.695121	-0.348221	0.569157	1.49971	-0.576421	0.714932	1.07869
AC005324.5	-4.17977							-1.8448
AC005324.6
AC005326.1			-2.66777	-6.52744	-4.20604			-5.86693
AC005329.1	-1.26905	1.25012	1.59939	1.25215	1.92769	0.463421	0.650574	-1.56121
AC005329.2
AC005329.3	-0.176745	0.0750358	0.265618	0.620296	-0.170578	1.57693	0.101151	-0.868008
AC005330.1	1.61046	2.4143	3.33637	3.36047	3.05396	3.09539	1.66099
AC005332.1	0.223171	0.316649	0.150197	-3.53479	0.899943	0.185367	-0.780764	-2.79272
AC005332.10	0.955516
AC005332.2
AC005332.3	-1.0861		3.80701	2.64121	4.03529
AC005332.4	-1.1993
AC005332.5		1.94309	3.63507	3.32373	2.9282			3.1545
AC005332.6	-1.15468	-0.299392	-2.0407	0.468625	0.24392	-0.319748	-0.821472	-1.37589
AC005332.7	-1.25996	-0.729951	-1.0397	-0.693004	-1.00891	-1.46102	0.157128	-0.572003
AC005332.8	-0.642869	-0.484928	0.35601	0.029851	0.0682991	0.192722	-0.701126	-0.755601
AC005332.9	0.541079	0.0456263	0.259369	0.393221	0.0578646	0.624473	0.369859	-0.129655
AC005336.1	-0.883283	0.198272	-1.90853	-0.580581	-2.03748	0.0858478
AC005336.2								3.71678
AC005336.3			1.32306	2.54031	1.47255
AC005339.1	-2.23714	0.0529014	-3.35061				-0.0672919	2.56622
AC005341.1
AC005342.1			-0.734838	-0.23328
AC005342.2
AC005344.1
AC005345.1
AC005351.1
AC005355.1
AC005355.2	1.77078		-4.03967	0.184463	0.900575
AC005357.1
AC005357.2
AC005358.1
AC005358.2
AC005363.1	-3.21394	-0.466558	-3.56051	-4.29464	-2.55778	-2.00963	-3.88085	-3.95439
AC005363.2	0.920987	0.721721	-0.238168	-0.739686	0.370607		0.0672216	-0.43222
AC005377.1
AC005379.1	1.77717	0.652637	2.60093	1.77951	2.85806	1.29276	1.47879	-0.275637
AC005381.1
AC005383.1
AC005387.1	-2.24734	0.644225	1.00424	-0.508793	-1.06694
AC005387.2	-2.45947			-1.52852	0.404876		-0.439345
AC005391.1	0.478752	-0.373964	0.90545	0.537773	0.720735		1.85553	0.919124
AC005392.1
AC005392.2
AC005392.3
AC005393.1	-0.85197							1.07416
AC005394.1
AC005394.2
AC005410.1		-1.24507	-0.310013	0.066045	-0.00143237	-4.633	-0.442462
AC005410.2		2.06639	0.652193	1.87066	3.36785		-1.19178	-1.32656
AC005412.1	-0.0323116	0.241904	-0.130352	0.118556	-0.894686	-0.257912	0.187823	-0.516205
AC005412.2			1.46664	1.58904	1.65629		-2.81564
AC005412.3
AC005476.1	-0.255519
AC005476.2	1.01953							-0.112334
AC005479.1	-0.316907		-1.30342		-0.870578	-1.18238	-2.30596	0.342976
AC005479.2	-0.387252	0.903743	1.80632	1.44765	2.22523		-0.634689
AC005479.3	-0.787136	1.56843	1.49857	2.13115	-1.2784		-0.747939
AC005480.1	0.0132397	-1.05223	-0.477233	1.06304	1.68478	0.489772	-0.441893	0.313734
AC005480.2	0.743384	-2.46212	-0.276921		0.230844
AC005481.1		-1.94233	-1.51804	-0.534872	0.336794
AC005482.1
AC005486.1
AC005487.1
AC005495.1
AC005498.1
AC005498.2	-1.4274						-0.476898	0.0951994
AC005498.3	-2.42223						-5.08665	-1.28835
AC005514.1								-1.10477
AC005515.1
AC005517.1	-2.76538	-2.3221	-1.01461	-0.952061	-0.386586	-0.573565	-0.868428	-0.638805
AC005517.2	-2.88303	-3.81052	-1.52272	-2.75095	-2.15532		-1.4393
AC005518.1
AC005518.2
AC005519.1
AC005519.2	-1.76504	-0.373239	-1.61256	-0.764357	-1.2126	-0.912057	0.0891968	-1.36241
AC005520.1	0.25585	2.08729	0.569979	2.32759	0.635017	-0.507128	-1.32729	1.44138
AC005520.2	2.34534	1.55076	3.02744	3.31096	2.91753	1.79676	2.10265	-0.039063
AC005520.3								-1.35113
AC005520.4
AC005520.5	4.18337	1.61052	1.83631	-4.5449	1.32353	-0.997638	-0.631922	-1.67766
AC005521.1
AC005522.1
AC005522.2	-0.448731				0.810202
AC005523.1	0.0232314	0.580899	1.69921	1.83327	1.34723		1.88644	-0.585346
AC005523.2							1.45582
AC005524.1			-0.0184138		0.191029
AC005529.1		1.44549	3.19425		2.84546		-0.24484
AC005531.1
AC005532.1	-1.97902	2.26435	2.87516	3.58844	3.58677	1.93024	-1.08375	2.43731
AC005532.2
AC005534.1	-1.82466	0.628786	-0.349294	0.668257	-0.415865	-1.39087	-1.20692	-2.16689
AC005534.2						-1.71385
AC005537.1							-0.180723
AC005538.1
AC005538.2	-0.436325	-0.576012	-1.06215		1.83563	-0.0261489	-0.859472	0.425907
AC005539.1
AC005540.1	0.346512	0.406636	3.49873	-0.29305	4.18522	3.40424	0.632179	-0.00755094
AC005544.1
AC005544.2
AC005546.1	-0.350857	-0.292237	-0.459722	-1.58515	-0.0978889	-0.0655812	-1.14106	-0.319064
AC005549.1
AC005550.1
AC005550.2	0.379138	-1.62146	0.0604065	-0.361951	-2.21183	-0.657226	-0.820568	-0.171045
AC005550.3	2.03905						0.0311072
AC005551.1
AC005552.1
AC005559.1			1.80976		2.7967
AC005562.1	-0.567298	-1.16832	-0.114686	-0.160282	-0.76052	0.568358	0.527536	-0.682953
AC005562.2				-1.03837			0.415565	-0.241181
AC005578.1	0.915168	1.5851	2.57037	2.80495	0.78053	0.0992005
AC005580.1
AC005586.1	0.197326	-0.578767	-0.319454	-0.628921	-0.777009	0.781005	0.649153	0.620555
AC005586.2	-1.76816	1.9182	0.692421	0.784645	0.70289	-3.81388	-0.0211313	-1.76319
AC005587.1
AC005588.1
AC005592.1		-0.14444	-0.269745		-2.66622
AC005593.1		-0.315366	1.95417	0.777091	1.87217		-0.100382	0.619955
AC005597.1
AC005606.1
AC005606.2	0.631843	0.252701	-1.46289	-0.480093	-2.97736	-1.39345	1.02805	1.37353
AC005609.1
AC005609.2
AC005609.3
AC005609.4
AC005609.5			-0.468239		0.34151
AC005614.1	-0.0755747	-0.149334	-0.0479957	0.497608	0.089392	1.30744	2.00602	1.73216
AC005614.2
AC005616.1
AC005618.1	-0.584882	0.582937	0.781617	1.52114	1.56693	-1.28405	0.388652
AC005618.2	-3.10298						-0.382734
AC005618.3
AC005618.4							-0.320063
AC005622.1
AC005625.1			0.630299	0.539466	0.883609	0.692086
AC005632.1
AC005632.2	2.00242	-0.0612051	0.872753	0.349716	1.06627		0.822846	-0.270514
AC005632.3						-2.12738
AC005632.4
AC005668.1
AC005670.1	-0.286887	-2.42896	-1.99726	-2.36575	-0.77659			-0.605009
AC005670.2		-0.991566		0.0432649	0.0256252
AC005674.1		-0.182372	-1.08159	-0.44952	0.831168			-3.64341
AC005674.2	-0.359271	0.753763	0.338773	0.923175	0.341666	1.02551	0.194473	-0.851282
AC005682.1	-0.707941	-0.0226212	-1.08858	-1.10567	-2.73789		-2.24275	-0.852673
AC005691.1
AC005692.1
AC005692.2
AC005695.1	1.42073							-0.31181
AC005695.2		0.146479
AC005695.3	-0.548166					0.0310428	-2.59255	-0.745913
AC005696.1	-2.19323	0.897937	0.343746	0.243927	0.354826		-1.65868	-0.305885
AC005696.2
AC005696.3	-0.640752	0.722172	0.281645	0.683943	0.904839	2.16333	2.51113
AC005696.4								-0.0725343
AC005697.1						3.40766
AC005697.2							2.4775
AC005699.1							-0.421189
AC005702.1	0.61596	1.9123	2.72306	2.03304	2.10638	-0.674788	2.0589	1.62379
AC005702.2
AC005702.3								-1.26914
AC005702.4
AC005702.5
AC005703.1
AC005703.2
AC005703.3
AC005703.4
AC005703.5
AC005703.6		1.27187	3.33028	1.35479	3.44044	0.101127	3.20793
AC005722.1
AC005722.2	-1.75907					-0.337532	-2.80791
AC005722.3
AC005725.1
AC005726.1
AC005726.2	-1.75077	-0.294183	0.342827	-0.859775	0.602965	-2.46186	-1.05979	-1.97256
AC005726.3	-1.53552	0.678997	-0.440178		0.690205	-2.18515	-2.22202	-2.85479
AC005726.4	-1.39534	-1.14492	-1.2171	-0.87623	-1.84821	-2.24637	-1.6481	-4.33539
AC005726.5
AC005726.6
AC005730.1
AC005730.2						-1.26837		-1.96913
AC005730.3	-0.903445	2.08946	0.491054	-2.57537	1.71399	0.457197	1.58689	-0.144289
AC005736.1	-3.08167	0.840846	0.528801	-0.548246	-0.908986	-2.91897	-0.579407	0.408717
AC005736.3
AC005740.1
AC005740.2						-0.00108186	0.228367
AC005740.3
AC005740.4	-1.98971	-0.222263		0.0288728	-1.41954		-4.75977	-0.891464
AC005741.1
AC005746.1	-0.829803	0.705587	1.58067	1.02982	1.14393	-0.633852	0.110532	2.45279
AC005746.2	-2.79936	0.791809	-0.13798	1.06411	0.336908		-0.231432	2.03616
AC005746.3			0.228672	-1.00929	-0.038701	-3.29737
AC005753.1
AC005757.1
AC005758.1
AC005759.1		-0.633348	-0.928796	0.955584	0.723101
AC005771.1
AC005772.1
AC005774.1
AC005775.1	0.0435009	-0.794273	1.60647	0.473221	1.63589	0.706757	3.26267	1.29921
AC005776.1	-0.337121	2.08405		0.332949	0.847566			-0.591154
AC005776.2	-0.127123	1.2478	0.574737	0.901583	1.16653	0.176448	0.182132	-0.887654
AC005777.1
AC005785.1	-0.0913531	0.439617	2.42816	0.901951	1.89987	0.939262	0.191194	0.480968
AC005785.2	0.0954554	0.064912	-0.223092	0.540661	-3.24391	-0.798263	0.532841	1.38949
AC005786.1	-3.20384
AC005786.2
AC005786.3			-2.18268				-0.383289	-0.497783
AC005786.4		-3.86542	-1.91092		0.548848
AC005789.1
AC005790.1	0.279774
AC005796.1
AC005798.1
AC005808.1
AC005821.1
AC005822.1	1.45289	0.502541	1.37034	0.88256	0.157669	1.97124	1.75994	2.07385
AC005823.1
AC005823.2
AC005828.1
AC005828.2
AC005828.3
AC005828.4							-1.88826
AC005828.5
AC005828.6								2.86829
AC005828.7
AC005829.1	-0.350924	-0.338331	0.205227	-0.925191	0.489268	-1.46499	0.00730409	-0.914387
AC005829.2	2.28749	0.33681	1.1084	-0.0954693	1.17831	0.456923	0.604441	-1.56413
AC005831.1	-1.62386	3.89116	2.31522	4.32184	4.06209	-0.752841
AC005832.1		0.0193032	-2.62451	-0.806286	1.24085		0.66469	0.92135
AC005832.2
AC005832.3
AC005832.4	-0.400592	-0.0380035	-1.28775	-0.884876	-0.363381	0.0458512	-0.935854	-0.354386
AC005833.1			-0.201398	-0.248704	2.10142	1.33515	-3.56865
AC005833.2	2.32052	1.57065	2.55952	2.13978	1.27942	0.416137	0.634011
AC005833.3	0.0578398	0.110161	-0.0530262	-0.196296	-0.831589	-0.258706	0.646862	0.93646
AC005833.4						-0.587183
AC005837.1	0.436228	1.06338	0.0899699	1.11749	0.377561	-0.66426	0.860181	0.6078
AC005837.2						-1.74422
AC005837.3								2.17938
AC005838.1
AC005838.2	1.06631	1.10919	-0.695505	-0.147973	-1.39916		-0.00626642	0.451781
AC005839.1	-0.0682545	0.317926	-1.59315	-0.17796	-1.54002	-0.603727	0.00755312	0.0371349
AC005840.1	-0.295733	-0.661539	3.08679	1.21087	2.90321	-0.113026	-1.09571	-0.509592
AC005840.2
AC005840.3	0.881328	1.86615	0.781271	1.29877	1.20917	0.261726	0.794107
AC005840.4	0.00423898	-0.619153	1.57893	2.42604	0.581538	0.824017	-0.0285858	0.728347
AC005840.5	1.96871	0.116273	2.72866	3.55823	3.10952	4.12971	2.59449	2.9452
AC005841.1			-6.26195	0.579418
AC005841.2	-0.573189	-0.692487	-0.518435	-0.103052	0.179234	-0.804391	-1.3666	-0.105478
AC005842.1	0.024525	-2.61317	0.140246	0.0793181	-0.680294	0.0527445	0.928146
AC005845.1
AC005858.1								-1.8758
AC005858.2
AC005858.3
AC005858.4
AC005863.1
AC005865.1
AC005865.2
AC005868.1
AC005871.1
AC005871.2			0.283542		-0.240352	2.31291
AC005884.1					1.1741
AC005884.2					3.25515
AC005885.1
AC005899.1
AC005899.2
AC005899.3
AC005899.4			-1.72743			-2.77894	-1.64777	0.581392
AC005899.5
AC005899.6		5.19309	4.41642	5.12026	3.64745	0.62049	-1.00979	0.125151
AC005899.7	-1.46826
AC005899.8	1.44664	1.03333	1.75063	2.29494	2.4223	1.70262	1.46781	1.23523
AC005901.1		1.15276	0.798172	2.46702	3.54485		3.56292
AC005906.1
AC005906.2						3.62369
AC005908.1
AC005908.2
AC005909.1
AC005911.1	-0.293965	-0.48813	-0.910545	0.532754	-2.90526	-1.95893	0.257735	0.712203
AC005912.1	-0.420839	-0.0873021	-1.11481	-0.225322	-1.12801	-0.425924	-0.371734	-0.0588428
AC005912.2						1.58703
AC005915.1							1.01787	0.944035
AC005920.1	-3.57842	0.241429	-1.11959	-0.655514	-0.448919		0.0753857	1.30244
AC005920.2
AC005920.3						-0.147595
AC005920.4
AC005921.1
AC005921.2
AC005921.3	0.477713	-0.0487851	-1.32892	-1.20386	-1.20895	-1.07009		-1.27568
AC005943.1		-1.10282				-0.849735	-0.18038	-1.71359
AC005943.2
AC005944.1
AC005951.1
AC005951.2
AC005954.1	1.18515		0.269342		1.27631			0.687841
AC005954.2	-1.53833
AC005962.1
AC005962.2		0.441626	-0.33587	0.0277023	0.574433		-1.25253
AC005972.2
AC005972.3
AC005972.4	2.04421							0.543075
AC005993.1						-1.55377	0.0109533
AC005996.1	1.66179	0.0738233	0.661689	0.857562	0.942838	-2.13375	0.773784	2.29754
AC005996.2
AC005999.1
AC006001.1	0.885717	2.84609	3.66231	2.15056	4.44541	0.464711	1.78916	3.17289
AC006001.2	1.47333	1.75596	2.74183	2.3063	2.60143	2.41784	1.97274	2.78542
AC006001.3	0.511512	0.83221	0.296217	0.73289	0.404355	0.518344	0.630079	0.715552
AC006001.4	-0.0788173	-0.142863	1.11531	0.466244	1.736	-0.240726	-0.484593	-0.281276
AC006003.1
AC006004.1
AC006006.1
AC006007.1
AC006011.1	-0.768337	-0.086776	-1.71858	-0.782757	-1.41662	-0.956891	-0.432006	-0.754684
AC006011.2			-1.07551	-0.817145	0.836183		-5.22504	-0.277723
AC006012.1
AC006013.1
AC006015.1
AC006017.1	0.83691					1.63978	-0.301893	0.402918
AC006019.1	-0.384116		-1.62681	-0.34361	2.3047
AC006019.2
AC006019.3
AC006020.1
AC006022.1
AC006023.1	-0.0344274							-0.902941
AC006023.2						-0.196825
AC006026.1	0.913716		0.4849	-0.267311	1.65365		2.22761	-0.318672
AC006026.2
AC006026.3								0.290501
AC006027.1
AC006028.1		-1.80765						-1.98778
AC006030.1		3.54024	4.15294	4.35071	4.7874		-1.18609	0.571144
AC006033.1							-1.65316
AC006033.2
AC006037.1
AC006037.2
AC006041.1
AC006042.1	-0.335423					-0.0142837	1.7379
AC006042.2	2.73374	2.23598	2.07567	1.94925	4.89308	1.36443	1.51399	1.3993
AC006042.3	2.05178							2.71606
AC006042.4	3.10032							0.702996
AC006055.1
AC006058.1						-1.39921	-2.61538
AC006058.2
AC006058.3
AC006058.4						-2.01542		-1.10899
AC006059.1	-0.804946	-1.39937	-1.41509	-1.37157	1.11579	-0.225502	-3.28158	0.0888269
AC006063.1
AC006063.2
AC006064.1	-0.489575	1.31566		0.375813	-0.630578		-1.46147
AC006064.2	-0.202851	1.37513	0.648993	1.1616	1.41219	-0.182615	0.0430375	-1.08375
AC006064.3	-2.51621	-1.44124	-1.60996	-1.15902	0.423416		-0.208593	-1.43977
AC006064.4	-1.07725	-1.29989	-1.95324			-0.562198	-0.188184	0.0211546
AC006064.5	-2.63306	-1.46316	-1.19887	0.680163	0.53006	-0.23834	-2.15734	-0.543658
AC006065.1
AC006065.2
AC006065.3
AC006065.4
AC006065.5
AC006065.6
AC006070.1
AC006076.1		0.18957			-1.35498
AC006077.1
AC006077.2	0.0153629	-0.845735	0.851459	-0.409161	0.708653	-1.88594	-0.181023	0.16207
AC006111.1
AC006111.2	0.606693	2.46516	1.25962	1.81019	1.48097	0.164387	0.619495	0.729277
AC006111.3
AC006115.2
AC006116.1	-0.0480739	0.583618		-0.0242517	-2.09866		0.772991	-2.27747
AC006116.10	2.45443	0.757966	-2.19852	-0.195108	-3.14895	0.702092	-0.115399	-0.959996
AC006116.2		-1.30511	-1.76754	-0.340962	-0.0293169		1.39195
AC006116.3	0.279885
AC006116.4	0.691161		-0.822566		2.36442	-0.188631	-0.711083
AC006116.5	0.664662		0.38668	1.24328	2.67066
AC006116.6	1.02721	1.56281	-0.00913276	1.4583	1.74906		-0.969585	2.05751
AC006116.7	0.490211	0.962197	-0.927156	-0.0307023	-1.19662	1.73147	0.0620458	-1.30284
AC006116.8	0.105974	0.0316408	0.136779	-0.491281	-0.0845944	-2.37026	1.41915	-0.238398
AC006116.9	-0.906684	0.380468	0.393346	1.93082	1.31511	-1.66867	0.828456	3.00818
AC006120.1	-1.04744	2.14752	4.96517	4.6305	4.56828		0.0516798
AC006122.1	0.228697	-1.86329	0.656081	0.591668	-3.89843		-2.88997	0.0751336
AC006128.1	-0.404532	-1.04709	0.00387979	-0.267074	0.189366	0.915541	0.779798	-0.339047
AC006130.1
AC006130.2		0.709228	-2.95927		-2.73708
AC006133.1
AC006141.1		-4.74498	-1.17567	0.408822	2.17123
AC006144.1								1.97959
AC006145.1
AC006146.1
AC006148.1						-1.30081
AC006148.2
AC006150.1
AC006153.1				-2.8396		-0.425319		-2.58706
AC006157.1		-2.1062		-1.6665
AC006158.1
AC006159.1
AC006159.2
AC006160.1	-1.87704	-0.591188	-1.08774	0.145224	0.242179	1.0198	0.995334	-0.427419
AC006160.2
AC006195.1						3.94579
AC006197.1
AC006199.1
AC006205.1
AC006205.2	-0.0803963						-0.2864
AC006206.1						0.172719
AC006206.2						1.21507	0.582177
AC006207.1
AC006210.1
AC006210.2
AC006213.1	4.06082	1.11937	0.433172	1.9225	0.0250592	-0.516708	1.0875	0.971286
AC006213.2		-1.81458	-2.56254	-0.992756	-1.93357			-1.37079
AC006213.3	-0.339607	0.230615	-1.43052	0.50861	0.953053	-0.157699	0.0365517	-0.604075
AC006213.4	2.13336	0.614376	0.80066	0.695897	0.445661	0.350175	0.0250236	0.928864
AC006213.5		-1.32879	-1.60979	-3.5047			-1.76881
AC006213.6	-1.77039	-1.12616	-0.754707	0.182394	-0.970452	-0.0980188	-0.946759	-0.598169
AC006236.1
AC006237.1
AC006238.1	1.17394	2.29564	1.88235	2.38531	2.69241			2.97835
AC006249.1						1.34867
AC006252.1	-0.543204	-1.71625	-0.0421894	-0.311085	0.592638	-3.09991	-0.567168	-1.93972
AC006254.1	-1.14113	-1.4476	-0.211401	-0.0645904	1.10485	-0.199995	-0.393213	-2.34648
AC006254.2				-1.69722		0.305791		0.449245
AC006254.3	2.57099					-0.451594
AC006262.1	4.04918
AC006262.2
AC006262.3
AC006262.4
AC006269.1							0.553176
AC006270.1
AC006270.2
AC006270.3
AC006272.1
AC006272.2		0.317083	-0.384752		-0.246003	-0.938897	-0.994807
AC006273.1	2.07622	1.20872	3.45172	3.0415	2.64866	0.870654	5.24787	1.29695
AC006277.1	-1.14736	-1.09618	-1.23444	-0.63477	-0.331639	-3.34167	-0.0937283	-0.973405
AC006288.1
AC006296.1
AC006296.2
AC006299.1	-0.136359	3.61942	3.89354	3.9114	4.03039		0.598033	-1.1071
AC006305.1
AC006305.2
AC006305.3
AC006326.1
AC006328.1	-1.70809
AC006328.2
AC006329.1	-0.738073	1.00501	-1.08837	-0.290893	-0.860127	-1.22358	-1.05806	-1.60427
AC006329.2
AC006330.1	1.10365	-0.304823	-1.58292	0.219322	0.238704	-0.975168	2.65894	-0.27188
AC006333.1							-0.836345
AC006333.2	0.233188	-0.203652	-0.490484	-0.208913	-0.105741	-1.6903	0.95407	0.492518
AC006335.1
AC006335.3
AC006338.1
AC006338.2
AC006349.1	-1.62355	-0.551106			-1.40996
AC006355.1
AC006355.2
AC006357.1	-1.53693					-1.43387	-1.3188
AC006362.1
AC006363.1
AC006366.1
AC006369.1					1.6229
AC006369.2
AC006372.1					1.01254
AC006372.2							0.461817
AC006372.3	1.64538
AC006372.4	1.10399					3.08211
AC006378.1	-3.04353		-0.849555	-0.904369			-1.85461	-0.877811
AC006378.2			-1.30623		1.37314
AC006380.1
AC006386.1
AC006386.2
AC006387.1
AC006390.1
AC006427.1
AC006435.1
AC006435.2	-0.756624	-0.534685	-0.577218	-0.755392	0.0433363	-0.597501	-2.58019	-0.860457
AC006435.3
AC006435.4
AC006435.5
AC006441.1	2.45887
AC006441.2
AC006441.3
AC006441.4
AC006441.5
AC006445.1
AC006445.2		-0.132894	0.959509	1.19079	2.44338
AC006449.1	-0.347337						0.482268
AC006449.2		1.39335	1.53644	1.68995	1.83477	0.832319		-0.545812
AC006449.3	1.70865			-0.431617	1.54081			2.68115
AC006449.5	-0.25034	0.000394916	-1.26784	-0.698365	-0.985239	-0.589064	-0.57796	-0.513129
AC006449.6	2.13141	0.331129	1.06892	1.0186	0.930167	0.223214	1.4936	-0.215362
AC006449.7
AC006450.1
AC006450.2								-1.00438
AC006450.3								0.0651101
AC006453.1
AC006453.2	0.0493827	0.482426	-0.0544599	0.357543	0.102092	-0.202326	0.0517741	-0.433259
AC006453.3
AC006453.4	-2.26216
AC006453.5
AC006455.1
AC006455.2
AC006455.3					2.10191
AC006455.4
AC006455.5
AC006455.6
AC006455.7
AC006455.8
AC006457.1
AC006458.1
AC006460.1							-0.942678
AC006460.2	0.468496	1.94378	3.40118	2.31697	3.43681	0.440352	0.378786	1.37269
AC006461.1
AC006463.1
AC006463.2	-0.645965	0.227361	2.71552	0.770152	3.39257	-1.32375	-2.00681	0.063251
AC006466.1
AC006480.1	0.215332	-0.0316362		1.06015		-0.175876
AC006480.2	-0.865901	-1.02204	-2.12434	-0.193215	0.35136	-2.37969	-5.39917	-0.765492
AC006482.1
AC006483.1	4.15473	1.73324		-0.93746	2.17957	-1.29469
AC006483.2		-1.46932	-1.08907	-0.221776	-2.6114			-2.71679
AC006484.1
AC006486.1	-2.28196	6.74986	6.63546	6.92342	6.05879	-0.644401	3.10467	-1.20001
AC006486.2	-1.4069	-0.565382	0.785096	0.91892	0.680839	-0.660109	-1.38806	-1.82665
AC006487.1
AC006487.2						-1.12123
AC006499.1
AC006499.2
AC006499.3
AC006499.4
AC006499.5
AC006499.6
AC006499.7
AC006499.8
AC006504.1	-1.65982	0.354149	-0.478926	-0.0822113	-0.317495	-0.213848	-1.8299	0.107374
AC006504.2		0.31774			-0.799004
AC006504.3		-0.912391	-1.60929	-0.0836486	-3.23961	-1.8036	-1.42241	-2.54225
AC006504.4
AC006504.5	-2.18158	-0.385701	-0.982788	-1.0908	-0.95707	-1.05644	-1.55813	-1.57138
AC006504.6
AC006504.8	-2.12217	-0.329857	-2.04802	-1.92897	-1.3408	-3.51933	-1.59974	-3.85931
AC006509.1
AC006509.2
AC006511.1
AC006511.2		-0.268901	3.72831		2.73024	0.883683
AC006511.3	1.05814	1.15374	1.17643	1.44845	1.02914	0.355357	2.01014	0.851856
AC006511.4								-0.219335
AC006511.5	1.70554	2.95237	2.29676	4.71006	3.89406	1.14132	2.70094	4.68082
AC006512.1		4.68063	6.42176	-0.0818204	5.25035
AC006512.2
AC006517.1		2.52182	2.18754	3.55895	3.86954		1.33542
AC006518.1	-2.18142
AC006518.2	-1.32087	0.822988	0.710031	1.82272	1.73077		0.818016	-0.547301
AC006529.1
AC006530.1
AC006534.1
AC006538.1	-0.982971	-1.27894	-1.51646	-1.34628	-0.917826	1.28033	-0.22867	-1.06933
AC006538.2	-1.1021	-0.76311	-0.0304261	-0.529217	-0.186065	-1.42168	-1.09378	-1.44249
AC006538.3
AC006539.1		1.12154	1.92425	2.18558	0.478274
AC006539.2	-0.620921	-1.39854	-1.14306	-0.64173		1.43909	2.73798	1.08937
AC006539.3
AC006547.1	-1.27526	-1.76233	-2.59234	-1.55008	-2.00188	-1.14455	-1.76177	-2.91278
AC006547.2	-0.49571	3.97985	0.761292	5.57054	4.73828	-5.73002
AC006547.3						-4.94467
AC006548.1
AC006548.2
AC006557.1	-2.04187	-1.98363	-0.615244	-0.639015	-0.997862	0.525499	-2.06373	-2.53663
AC006557.2
AC006557.3
AC006557.4	-1.92218	1.04071	0.881123	0.212669	1.77614	-0.14273	-0.524214
AC006557.5	-2.25646	-0.0264105	0.0840771	1.20475	-0.47005		-1.27042
AC006557.6	-0.709386	0.403521	1.49077	0.169319	0.132908	1.77216	2.10571	1.9908
AC006566.1		1.2785	1.48176	-3.00879	2.89297		1.64239	-0.307126
AC006581.1
AC006581.2								-2.06957
AC006600.1
AC006600.2
AC006840.1
AC006924.1
AC006927.1
AC006927.2
AC006927.3
AC006927.4
AC006942.1		-0.612608	1.62696	-0.769584	2.78726		-0.851334	0.521613
AC006946.1						-1.38584	-3.93071	-0.754472
AC006946.2								-0.957999
AC006946.3								-1.70616
AC006947.1
AC006960.1
AC006960.2
AC006960.3	-1.17368
AC006963.1							-2.22729
AC006965.1
AC006967.1
AC006967.2
AC006967.3
AC006970.1								-2.79362
AC006970.2
AC006971.1	-0.429929	0.265776	1.14019	0.0152441	2.52818	2.97482	0.813077
AC006974.1
AC006974.2
AC006978.1	-0.891339	-0.238507	-1.57954	-0.852353	-0.48483	-1.90212	0.369887	0.0868101
AC006978.2		2.63065	0.0851185	1.47925	-1.89979	-1.03831		4.46202
AC006986.1
AC006987.4
AC006989.1
AC006994.1	-0.151521				-1.33689		-0.761243
AC006994.2	-1.57695						0.69797
AC007000.1	-0.503015	-0.614158	-0.255043	-0.624506	-0.505057	-0.417308	1.55537	0.447686
AC007000.2
AC007000.3	6.57956
AC007001.1
AC007003.1
AC007009.1	-0.792289					-2.25014
AC007012.1
AC007012.2
AC007014.1
AC007014.2	5.23731	-0.940865	-3.19993	-0.184947	-1.17837	1.89491
AC007016.1
AC007029.1	-0.383003		2.45262	1.09128	1.09064	-5.072	-0.344155	0.0426221
AC007032.1	-0.348003	-1.00291	-0.128374	0.809752	0.264335	-3.39121	0.886039	2.91131
AC007036.1
AC007036.2
AC007036.3	1.6256	-0.413448	-0.299055	1.01721	-0.0488398	-1.45835	-0.690103	-0.389251
AC007038.1	1.08597	0.817531	0.613298	1.08789	0.399353	-0.610576	0.291141	-0.509901
AC007038.2	-0.802285	-0.348515	-2.27827	-1.84254	-2.72312	-1.03808	-1.3368	-1.75392
AC007040.1	1.70945	-0.395338	0.183844	0.0174538	0.870327	-0.513205	-0.525657	-0.535976
AC007040.2	0.555214	0.286292	0.364627	0.579086	0.862453			-0.315358
AC007041.1	1.26646	0.0888615	0.623638	1.18837	1.14617	-0.788857	0.121451	-0.723632
AC007064.1
AC007064.2
AC007064.3
AC007064.4
AC007066.1	0.395075
AC007066.2	-1.21979	-0.794799	-1.37264	-0.624649	-0.115443	-2.62265	-0.702333	-0.627334
AC007068.1	-0.404165	-0.398426	-0.416177	-0.343005	-0.419025	-0.862431	-0.806964	-0.745082
AC007068.2
AC007091.1
AC007098.1			-0.57479	-2.45897	0.349157	-0.794918
AC007099.1	-1.40283	0.317749	-1.36536	-0.613836	-1.37554	-0.906453	-2.49897
AC007099.2
AC007100.1
AC007106.1							1.58947
AC007114.1	0.677358	0.673536	1.09326	1.15613	0.723868	-1.33652	1.4038	-0.0566677
AC007114.2	-1.09031	1.06941	1.43215	1.69144	1.57279	-0.382692	0.178044	-1.1276
AC007115.1
AC007126.1								-0.0705508
AC007128.1						1.77582	0.752446	1.51878
AC007128.2	-0.89438					1.40738	1.29451	5.54313
AC007136.1
AC007151.1		-1.11817		-1.27469	-2.98252
AC007159.1
AC007160.1					1.90912			0.344748
AC007161.1
AC007161.2					-1.17197			-1.54378
AC007161.3	-0.452856					0.38713	-0.376924	0.753398
AC007163.1	-0.736554	-0.168995	2.55682	0.813096	2.74831		2.01649	-0.0860387
AC007163.2
AC007179.1
AC007179.2
AC007179.3
AC007182.1	0.895956	0.165057	0.840918	1.20368	0.899947
AC007182.2	-0.378521	-0.852032	-0.424091	0.12492	0.704241	-1.21323	-1.26888	-1.51165
AC007191.1	-0.15207	-1.47578	-1.64977	-1.38715	-1.33318	-1.52535	0.864132	0.71791
AC007192.1	-0.624595	1.03964	0.779306	0.895002	1.00805	-0.278418	0.712143	-0.560124
AC007192.2
AC007193.1
AC007193.2
AC007193.3
AC007204.1							-0.643754
AC007204.2
AC007207.1
AC007207.2	-0.285055	1.06667	0.84836	1.06056	0.977996	2.56619	2.38995
AC007215.1			-0.0639952
AC007216.1					1.35279
AC007216.2	-0.978191	-0.101135	-2.13787	-0.939785	-1.50893	-1.85702	-1.19324
AC007216.3	-1.40912	0.566159	-0.209159	-0.660624	-0.149139	-1.00557	-2.25091	-2.40981
AC007216.4	-0.125854	-0.362793	-0.450821	0.180844	-1.50521	-0.210247	0.580906	-0.371657
AC007216.5
AC007218.1
AC007218.2
AC007220.1
AC007221.1
AC007221.2
AC007223.1
AC007224.1
AC007224.2					0.0460385
AC007225.1		0.761511	1.17825	1.73263	0.929211
AC007225.2
AC007229.1	-0.415486	-1.19605	1.51092	-0.579258	1.80526	0.89993	1.50363	0.0249288
AC007237.1
AC007238.1	0.319807	0.92969	1.15281	1.17615	1.28216	0.62091	0.426112	0.527723
AC007241.1
AC007249.2	0.761207	3.98708	3.79965	3.87592	3.57727	1.90806	2.777	1.83085
AC007250.1	-0.100771	0.879573	1.86594	0.084924	1.74667		0.904709	-0.982269
AC007253.1
AC007255.1	-1.0674	-1.42412	-1.6303	-0.926754	-2.29806	-0.932377	-0.356462
AC007255.2
AC007256.1	-0.39191	1.58589	-0.393006	-0.296957	1.83794		0.793047	-0.898712
AC007262.1
AC007271.1
AC007272.1		-0.92136	-0.156989	-0.96865	-0.508064			-1.60301
AC007274.1
AC007274.2
AC007274.3
AC007275.1
AC007277.1	-1.243	1.79081	1.1477	1.79974	1.29824	0.749949	-1.5153
AC007278.1
AC007278.2
AC007279.1	1.44163	-1.27181	-0.678564	0.396995	-0.968022		2.46182	1.31612
AC007283.1
AC007283.2	-0.103963			0.565232		-5.35255
AC007285.1	0.431825	0.0393043	2.16152	0.968876	3.11437	-0.455248	0.737047	0.912177
AC007285.2	0.873622	-0.0843732	-1.39028	0.573449		1.17772
AC007292.1	-0.628903	-0.448281	1.5833	1.17177	1.05664	-0.705107	0.618828	0.263038
AC007292.2	1.03369	1.34181	1.68077	1.63008	2.22495	0.016244	0.75174	-0.424542
AC007292.3	1.82939	1.09298	1.91412	1.11577	2.17645
AC007298.1
AC007298.2	2.06996	5.91218	5.34932	5.74298	5.92404		4.40113	1.09844
AC007308.1
AC007312.1								-0.489476
AC007314.1		-0.720882	-1.67918		0.603879
AC007318.1	0.0932792	-0.3386	-0.500731	-0.26719	-0.77856	-0.205501	0.157691	-0.0127596
AC007318.2	0.23965	1.2995	1.27593	1.25059	1.02431	0.132203	0.70932	0.241665
AC007319.1	1.10285	-1.14019	-0.472482	-0.536112	-1.19466	2.96883	1.27181	1.12597
AC007322.1
AC007322.2
AC007322.3
AC007322.4
AC007326.1
AC007326.2
AC007326.3
AC007326.4	1.29253						0.865673	-2.41308
AC007326.5	-4.56227					-3.65631		1.26673
AC007327.1
AC007327.2
AC007333.1
AC007333.2
AC007336.1		-3.19823	-2.35156	-5.91505	-0.712066	-1.81309
AC007336.2
AC007336.3		-1.12101	-1.03886	-1.37556	2.60146	-1.15085
AC007342.1					2.7892
AC007342.2
AC007342.3
AC007342.4		2.99204	2.28398	3.22695	1.95785	2.3846	-0.675614
AC007342.5			1.61166	1.3427	3.22126
AC007342.6	0.459881	0.302611	0.0311547	-0.23779	0.745482			-1.1511
AC007342.7	0.248475	0.975885	-1.10555	0.28783	-0.946574	-0.883418	0.242159	-0.371111
AC007342.8
AC007342.9
AC007346.1
AC007346.2
AC007347.1				-0.683406
AC007347.2
AC007349.1
AC007349.2
AC007349.3
AC007349.4
AC007359.1
AC007362.1						2.64574
AC007363.1
AC007364.1	1.05482	0.902229	0.869759	2.13881	0.728826	1.6783	2.0102	-0.0485419
AC007365.1	0.160842					0.977282	-0.327465	-0.981611
AC007365.2
AC007365.3
AC007368.1
AC007370.1
AC007370.2			-0.00683928		3.2957			0.975513
AC007375.1
AC007375.2
AC007375.3								2.66881
AC007376.1
AC007376.2
AC007378.1
AC007381.1
AC007382.1	-1.44405	0.18401	-1.35566	-0.086346	0.00782796	0.362824	-0.0129103	-0.910193
AC007383.1
AC007383.2	0.197664	-0.235293	0.399592	0.668822	0.286715	-0.255151	-0.0565952	1.57669
AC007383.3
AC007384.1						0.621689	1.67311	1.40919
AC007386.1	-2.13622	-3.36249	-1.79022	-1.93633	-3.53138		0.250791
AC007386.2	4.48483		0.826178		0.4943		0.952566	-1.48416
AC007387.1
AC007388.1	-0.466653	-0.495271	-0.110345	-0.208075	-0.338683	0.532259	-0.508696	-0.395798
AC007389.1	3.33901	2.50477	3.37656	3.73647	4.36895			2.56521
AC007389.2
AC007389.3
AC007389.4	1.38817	2.009	2.93885	2.56002	3.06337		2.90967	2.95905
AC007389.5							3.12067	0.241898
AC007390.1
AC007390.2	-0.199343	0.635583	-1.59198	-0.208117	-1.53611	0.186431	-0.920691	-0.0967412
AC007391.1
AC007394.1
AC007395.1
AC007402.1		0.189554		-0.017769	-2.04538		0.487524
AC007403.1							0.304707
AC007405.1	0.140684	0.977396	0.346884	0.905736	0.376997	-0.0738506	2.17321	2.44672
AC007405.2	1.32431	0.106122	2.59074	2.585	3.4096	1.74113		1.2704
AC007405.3	0.597062	1.13496	1.17182	1.34062	1.55356	-0.114368	0.798649	0.401544
AC007406.1
AC007406.2	2.98008	0.252543	1.57024	1.57336	0.864653
AC007406.3							-0.661964
AC007406.4			-1.24792	0.408114	1.88425
AC007406.5	0.441881	1.14006	0.166833	0.916042	-0.00863137	-0.0416245	-0.0224581	0.393355
AC007422.1
AC007422.2
AC007423.1
AC007424.1
AC007431.1		0.202277			1.93798
AC007431.2
AC007431.3	3.43605		2.98891	3.16766	3.49125
AC007435.1
AC007448.1
AC007448.2			-2.43302	0.163319
AC007448.3	1.59414	0.777436	2.69843	1.81476	2.32025	1.16635	2.00956	0.495108
AC007450.1
AC007450.2
AC007450.3
AC007450.4	0.735247						0.023984
AC007458.1
AC007463.1
AC007485.1	-0.11463		-1.26822		-0.578474	1.93473		-0.480553
AC007485.2	-0.814423	0.360956	-1.09025	-0.171501	-1.04238	-0.261821	-0.231587	0.24899
AC007490.1	-2.89587	1.2663	1.7439	1.31697	-2.71938		1.96445	-3.2468
AC007491.1
AC007493.1	1.22393	2.18415	2.49485	2.39002	2.82197	1.20592		-0.0800093
AC007493.2
AC007494.1	3.23067	4.1751	3.97549	4.64065	2.48307		1.25152	-0.704509
AC007494.2
AC007494.3		1.69032	-0.349573	1.06621	-2.6427
AC007495.1			1.7586	0.130389	3.52365
AC007495.2
AC007496.1
AC007496.2		-0.709559	-2.91728	-2.73035
AC007496.3	0.418347	-1.83896	-0.409333		-1.91014			-0.0196274
AC007497.1		-1.22264	-2.51258	-1.27549	-1.62632	-1.65958	-1.10613	0.157442
AC007513.1
AC007527.1
AC007527.2
AC007529.1
AC007529.2	-1.76385				3.63165		-0.619297
AC007533.1		0.15906		0.451739	0.922868
AC007536.1		2.58619	2.78704	2.70356	3.10942	1.40486
AC007537.1	-2.0167	-0.95796	-2.15905	-1.52326	-1.34326	-2.96283	-0.832533	-1.79233
AC007537.2						-1.39849
AC007540.1
AC007541.1	-1.23514	-0.208797	0.345346	-0.352351	0.70178		0.720343	-0.863475
AC007546.1	3.85357	0.726732	-0.254083	1.50471	-1.61192	2.75391	2.14443	-0.0977158
AC007546.2
AC007547.1
AC007547.2
AC007551.1
AC007551.2
AC007552.1
AC007552.2	1.89675	2.27786		1.1439	2.66015	-2.67944	-0.916182	-0.971013
AC007556.1
AC007557.1
AC007557.2
AC007557.3							0.538328
AC007557.4							-0.437963
AC007559.1
AC007560.1	-0.578818	0.0874628	-1.59891	0.386811	-1.03447		0.267821
AC007562.1
AC007563.1
AC007563.2
AC007563.3
AC007566.1	-2.12003	3.75917	0.239165	3.29397	0.494777	0.292971	0.312015	-0.580629
AC007566.2					-2.64902
AC007568.1
AC007569.1		1.29107	0.0246505	2.47017	2.99784
AC007570.1	0.950604	0.831716	2.79431	3.9011	2.66351		1.35086	2.05625
AC007595.1
AC007598.1
AC007598.2
AC007598.3
AC007599.1
AC007599.2
AC007601.1
AC007601.2
AC007603.1
AC007603.2
AC007603.3
AC007608.1		1.57772	1.76044	2.00982	2.21607	0.31025
AC007608.2		0.594472	0.482649	0.81736	1.44912	0.572036
AC007608.3	0.58219	-1.50306	-0.600731	-0.853406	-0.431166
AC007608.4		1.01417	0.281981	0.78476	1.35734	-0.482673
AC007610.1
AC007610.2		-0.408701
AC007610.3
AC007610.4		-2.70729	-4.57285	-4.31046	-1.17529		-1.50763	-0.655062
AC007611.1	-1.76085	0.380363	-0.513418	0.492038	0.0139404	-1.14101	-1.8325	-0.959631
AC007613.1	1.36812	-0.811048	0.162953	-0.08975	0.508467	-0.879508	1.82844	0.815594
AC007614.5
AC007614.6
AC007618.1
AC007619.1	0.637676					1.34138	-0.262996
AC007619.2
AC007620.1
AC007620.2
AC007620.3					0.905993	-0.692935	-2.17653
AC007621.1
AC007622.1						-0.908454
AC007622.2	-0.946743	0.751956	-0.320455	-0.482265	-0.0753597	1.685	0.309617	-0.706018
AC007631.1
AC007637.1		0.21044	1.13879	0.560647	1.72599		-0.144277
AC007638.1
AC007638.2	0.288346	1.20387	-0.563354	0.778829	-0.304168	1.54672	-0.534541	-1.47343
AC007639.1	3.13796	1.71295	3.62212	3.90516	2.83911	0.605834
AC007652.1
AC007655.1		-1.52162	-2.15034	0.367487	0.252181
AC007656.1
AC007656.2
AC007663.1	-3.1862						-1.11069	-0.136759
AC007663.2	-0.426917							0.0408624
AC007663.3	-1.27176	0.0229048	0.575167	-3.94035	0.729948	-1.223	0.916193
AC007663.4	-3.90294	-1.76076		-4.8244		0.108073	-2.48431	-2.6871
AC007666.1						-0.369824	0.503693	-1.83079
AC007671.1					0.470163
AC007671.2
AC007673.1
AC007677.1
AC007679.1
AC007679.2								0.65456
AC007679.3
AC007681.1	-0.771593	0.897356	-1.42256	-0.708066	-0.16959		-2.43546
AC007683.1	0.850377	1.26231	3.2386	1.6347	2.35052	-1.8422	2.59684	0.631527
AC007683.2	-0.448382						0.974153
AC007684.1		0.993901	1.71602	3.11031	2.44604
AC007685.1
AC007686.1		2.28056		1.20654	3.27221
AC007686.2
AC007686.3	1.76111	-0.0422812	0.406732	0.013237	0.347126	0.321203	2.34609	0.750341
AC007687.1						-3.33315
AC007688.1	1.57655	-0.0573274	2.44609	-2.85913	2.68689	-1.20439	2.64322	3.05175
AC007688.2							-1.59975
AC007690.1
AC007718.1
AC007728.1
AC007728.2	4.45142					-0.163054		4.70937
AC007728.3			0.574486	1.50183	1.30684
AC007731.1
AC007731.2	0.545092	-0.423128	-0.949171	-1.14929	-1.42117	-2.1165	-0.0312877	-0.288586
AC007731.3
AC007731.4
AC007731.5	1.3671	1.00534	1.29924	1.37196	0.549162	-0.590829	0.722637	-0.745823
AC007738.1
AC007741.1
AC007742.1
AC007742.2
AC007743.1	10.1249					2.0742	4.29002
AC007744.1
AC007749.1
AC007750.1
AC007751.1
AC007751.2
AC007773.1	0.193495	1.07164	1.62641	0.947139	2.04804	0.618591	-0.426081	0.392558
AC007780.1	-0.537766	0.660709	0.0308612	0.646487	0.158174	-0.471197	1.262
AC007785.1
AC007785.2
AC007785.3	-0.89927	1.94175	0.426587	1.68033	1.57995	-1.39253	-0.909193	-1.46842
AC007786.1		-0.47727	0.727943	0.169004	-0.420806		0.950355	0.111342
AC007786.2
AC007786.3
AC007787.1	1.93466	-0.646765		-0.0643189	0.394718
AC007787.2	0.436284	0.647617	-0.0769575	1.27266	0.615038			4.00303
AC007790.1					1.47676	4.77289
AC007792.1	-0.718652
AC007795.1
AC007823.1		2.75174	0.319923	1.69002	2.62177	-1.03312	-2.20542	-1.06032
AC007834.1
AC007834.2	-3.337		0.447268	-3.04115	-0.21231	0.503118
AC007842.1	0.312471	0.44299	0.191695	0.985473	-0.289622	0.446755	-1.02093	-0.0251967
AC007848.1						-0.198249	-0.818561
AC007848.2						0.886483	2.34873
AC007849.1							-1.42877
AC007849.2			1.44845	-1.09584	0.424725
AC007861.1
AC007861.2
AC007876.1
AC007878.1	-0.383488	-0.880837	-0.945205	-0.224077	-0.651367	0.389442	-0.483081	-1.07017
AC007879.1							-1.06205
AC007879.2
AC007879.3	1.50418
AC007879.4
AC007881.1	-0.453763	-1.17642	0.120619	-1.72601		0.593947	-1.86597	0.0529068
AC007881.2
AC007881.3	3.44451	0.216272	0.897553	-0.10694	1.58123		0.971547
AC007899.1		2.5871			1.68779
AC007906.1							2.73463
AC007906.2		0.98833	3.03406	2.88318	3.34942	2.84796	3.05396
AC007907.1
AC007919.1	-1.72072
AC007919.2		-4.08387			1.45062
AC007920.1
AC007920.2	-0.800273						0.778329
AC007922.1
AC007922.2						-0.921711
AC007922.3
AC007923.1	-1.53196						4.538
AC007923.2
AC007923.3
AC007923.4
AC007938.1	-2.62556						1.50064
AC007938.2	0.622754	2.394	1.50189	0.312543	2.22899	-2.86856	2.47861
AC007938.3	-0.193191	2.50784	0.359198	2.57681	1.31256	-0.0569349	-1.26304	-2.65376
AC007938.4	1.04843	0.728277	-0.0900945	0.442999	1.00192		-0.123618
AC007948.1
AC007950.1			-1.464		0.759988
AC007950.2	2.19118	1.18072	0.825537	0.709211	1.32614		-0.520487	1.08549
AC007952.1	-0.162198	1.96655	0.55368	-1.54107	0.586711	0.167027	1.32668
AC007952.2	-0.16216	2.15446	2.47355	0.231144	4.01707	-0.0573501	1.26769
AC007952.3
AC007952.4				-5.04297	2.13053
AC007952.5	-0.926231					-0.627048
AC007952.6	0.439778	0.547109	0.61372	1.74678	2.01426	-0.615652	-0.034059	2.36099
AC007952.7	-1.03942					0.619729
AC007952.8
AC007952.9
AC007953.1	0.351734							2.52351
AC007953.2
AC007954.1
AC007956.1	-1.00261	0.123487	0.828609	0.116216	1.48093		-1.12085	0.78235
AC007966.1							-0.155835
AC007967.1
AC007967.2
AC007967.3
AC007967.4
AC007969.1	-0.152848	-0.518534	0.173547	-0.19869	0.278796	-0.432325	-0.149291	-0.251356
AC007969.2						-0.0179621	1.98336
AC007991.1
AC007991.2
AC007991.3
AC007991.4
AC007992.1
AC007992.2
AC007993.1			1.56555	-0.265692	0.764743		1.46129
AC007993.2
AC007993.3
AC007996.1	-0.303663	-0.656166	-0.586438	0.0105394	-0.917368	0.762904	1.61149	0.942542
AC007998.1
AC007998.2	2.24607	-0.832127	-6.08776	-2.38041	-2.8497	0.723885	-0.10949	-2.02447
AC007998.3	-2.81966	0.760261		1.15315	-3.6013	-2.79201	-2.39761	-3.44268
AC007998.4	0.870159	0.158927	-0.524277	-0.765952	1.95529		-1.73214
AC007998.5	1.71876	-0.15925		1.20587			0.083818
AC008011.1
AC008011.2
AC008013.1						-3.13493	-1.99631
AC008013.2
AC008013.3		0.465037	-0.276452	-1.39125
AC008014.1	0.678206	1.36962	1.38203	1.81265	1.68448	-0.238518	0.383546	0.335023
AC008015.1
AC008021.1	1.41577	-2.40834	3.06572	0.230857	2.60268	-1.51427	-1.70953	-0.465513
AC008026.1	-0.40127	-0.204712	-0.533841	-0.773319	-0.879716	-0.507058	-0.293889	-0.245121
AC008026.2
AC008026.3		-0.559564	0.684601		1.04637	-1.19541
AC008033.1			3.12862		-0.435722
AC008033.2
AC008033.3		-0.439095	0.904117	2.20352	0.529315	-4.52255
AC008035.1	-0.245717	-0.0894406	-0.772746	-0.390284	-0.497372	0.993172	-0.449841	1.91598
AC008038.1	-0.525544	-0.446298	0.033043	-0.313849	0.0594925	-0.480156	-0.566922	-0.41095
AC008040.1	-3.99665	1.82545	2.86892	1.92129	4.676		1.78954	-2.37073
AC008040.2	-1.62363	-1.73646	-0.638344	-1.24816	0.323973	1.23608	-2.41276	-1.78244
AC008040.3
AC008040.4
AC008050.1
AC008055.1
AC008056.1
AC008056.2
AC008060.1
AC008060.2
AC008060.3
AC008060.4
AC008063.1	-0.215835	-0.219781	0.827757	1.26304	0.257941		-0.349129
AC008063.2
AC008065.1
AC008066.1			-3.63761		-0.866739
AC008067.1
AC008069.1
AC008072.1
AC008073.1
AC008073.2							-0.824185
AC008073.3		0.495864	-3.8193				0.643173
AC008074.1	1.42886	-0.165366	0.768177	0.451403	2.04582		2.34279	0.967502
AC008074.2						0.161111		0.359652
AC008074.3	0.661383	0.970381	-0.00616722	1.33586	0.0364232	2.13836	1.67208	1.55956
AC008079.1							-0.396431
AC008079.2	-1.92472	1.18845	0.841851	1.53933	1.53854	-2.06763	-0.655977	-2.50543
AC008080.1						2.26227
AC008080.2						-0.767458
AC008080.3
AC008080.4		-0.966781	0.493746		1.87921	1.09354
AC008083.1
AC008083.2							0.60737
AC008083.3							2.16868
AC008083.4							-0.740194
AC008088.1	-2.16249							4.82099
AC008103.1
AC008105.1	-2.12925							-1.18194
AC008105.2	-0.515781	-0.918474	-0.835062	-0.303496	-3.73907	-1.3381	-1.36398	-1.2085
AC008105.3	2.7085	1.07986	4.60561	2.76942	4.56524		0.636538	0.417885
AC008109.1	-0.141257					2.30725	-0.197186	0.0853249
AC008114.1							-0.0351875	-0.751207
AC008115.1
AC008115.2		0.963807		1.32229	2.35324		-0.678314
AC008115.3	0.236724	0.0256233	-0.0236741	1.0154	0.0643452	0.402535	0.334887	1.15073
AC008115.4						-1.60984	-0.653884	-0.313549
AC008121.1
AC008121.2			-0.237889	1.15976			-1.92155	-0.760974
AC008121.3							0.0522353
AC008124.1	1.26851	0.801288	2.59164	1.71662	2.32685	0.0516065	1.98103	2.37359
AC008125.1		0.693839	-0.69558	2.16849	2.04965	3.07601
AC008126.1	-0.160431	2.48458				-0.438916
AC008127.1
AC008127.2
AC008132.1	-1.13112	-2.10216	0.861552	1.16774	5.21276	-0.760498	-0.110724	-4.41191
AC008132.2							1.05499
AC008133.1
AC008133.2
AC008134.1
AC008147.1
AC008147.2	0.916136		0.46728	-0.971095	1.91996	-0.302714	0.524178
AC008147.3	-0.00822128						-2.62475
AC008147.4			-1.33893		0.988183			-0.199276
AC008149.1
AC008154.1
AC008154.2
AC008155.1
AC008155.2
AC008158.1	-0.673252	0.597819	1.30024	0.324967	0.960692	0.479276	0.862978	-0.368742
AC008162.1
AC008162.2
AC008163.1							0.796986
AC008164.1
AC008171.1
AC008173.1
AC008175.1
AC008175.2
AC008243.1	0.501119					-1.98625	-0.0728302
[truncated: 55,713 more rows]
