# Supplementary material for: A survey of optimal strategy for signature-based drug repositioning and an application to liver cancer
Source: eLife journal article supplement (doi:10.7554/elife.71880), 2022-02-18
Supplement: supp [file elife-71880-supp-v1.zip › elife_poa_e71880_Figure_8_source_data_1.xlsx]

## Sheet: Sheet1
Sequencing results of HHT-treated LX2 cells
gene_id	gene_name	Control_rep1	Control_rep2	HHT_1uM_rep1	HHT_1uM_rep2	HHT_5uM_rep1	HHT_5uM_rep2
ENSG00000000003	TSPAN6	416	524.92	358.07	438.92	447	651.92
ENSG00000000005	TNMD	0	0	0	0	1	0
ENSG00000000419	DPM1	1133	860	1023	1368	1167	1779
ENSG00000000457	SCYL3	89.96	119.53	290.07	406.39	398.58	532.75
ENSG00000000460	C1orf112	397.04	563.5	1002.26	1398.74	1522.06	2171.86
ENSG00000000938	FGR	0	0	2	2	0	3
ENSG00000000971	CFH	7	15.37	8	5	12	16
ENSG00000001036	FUCA2	3744.66	3645.67	2891.93	3252.31	3193.28	2839.94
ENSG00000001084	GCLC	334	423.02	551	734	579.94	999
ENSG00000001167	NFYA	1118.71	1359.5	508	582	512	669.73
ENSG00000001460	STPG1	397.05	494.01	425	539.04	504	667
ENSG00000001461	NIPAL3	1370.95	1442.99	956	1003.99	1072	1117
ENSG00000001497	LAS1L	2731	2623	3578	3649	3786	3544
ENSG00000001561	ENPP4	88	111	72	79	62	162
ENSG00000001617	SEMA3F	140	160	144	143	138	112
ENSG00000001626	CFTR	0	0	0	0	0	0
ENSG00000001629	ANKIB1	706	1315.77	721	906	910.97	1971.89
ENSG00000001630	CYP51A1	2010	2725.63	1536.97	2010	1545.8	2318
ENSG00000001631	KRIT1	205.32	385.84	266.24	231.28	281.03	561.62
ENSG00000002016	RAD52	195.62	209.35	776.91	918.92	984.74	1252.58
ENSG00000002079	MYH16	2	6	8	15	15	23
ENSG00000002330	BAD	2614.01	2263.64	3409.47	2861.66	3110.15	1563.64
ENSG00000002549	LAP3	2316	2526	1822	2267	1658	2534
ENSG00000002586	CD99	11113	10395	9694	9636	9813	7329
ENSG00000002587	HS3ST1	1	4	11	4	5	2
ENSG00000002726	AOC1	0	0	0	1	0	0
ENSG00000002745	WNT16	0	0	0	0	1	0
ENSG00000002746	HECW1	18	25	29	27	32.09	30
ENSG00000002822	MAD1L1	295.16	235.65	787.78	507.21	765.5	457.19
ENSG00000002834	LASP1	27442.5	26022	19362.7	20508	20353.3	18636.3
ENSG00000002919	SNX11	1212	1150.33	3527	3014	3542.64	2011
ENSG00000002933	TMEM176A	0	0	0	1	0	1
ENSG00000003056	M6PR	6849.18	6589.41	4648.06	5051.56	4749.98	4985.54
ENSG00000003096	KLHL13	9	17	14	12	14	20
ENSG00000003137	CYP26B1	85	60	207	154	172	200
ENSG00000003147	ICA1	0	0.99	0	1	0	1
ENSG00000003249	DBNDD1	75	67	55	53	73	38
ENSG00000003393	ALS2	913	1344	1375	1782	1586	2599
ENSG00000003400	CASP10	83	90	181.83	186.4	175.01	215.98
ENSG00000003402	CFLAR	1789.75	1917.93	3616.42	4183.93	3889.47	4417.68
ENSG00000003436	TFPI	158	272.99	112	123	106	224
ENSG00000003509	NDUFAF7	153.86	214.56	368.81	448.49	431.09	589.06
ENSG00000003756	RBM5	1415.86	1918.19	3419.92	4011.82	4045.65	4700.92
ENSG00000003987	MTMR7	6.87	18.75	16.25	27.73	23.06	49.24
ENSG00000003989	SLC7A2	159	270	204	249	228	308
ENSG00000004059	ARF5	5129.34	4875.85	6210	5011.84	5022	3347
ENSG00000004139	SARM1	1799.93	1894.53	2055.2	1910.35	2329.05	1932.77
ENSG00000004142	POLDIP2	8008.13	7628.32	9049.06	8851.04	9311.91	6996.49
ENSG00000004399	PLXND1	557	605	341	294	342	265
ENSG00000004455	AK2	6750.85	6209	7106.82	7492	7415.81	6075
ENSG00000004468	CD38	8	5	8	10	7	13
ENSG00000004478	FKBP4	6397	6027	8310	7771.76	8439	5966
ENSG00000004487	KDM1A	4162	4216	2624	2899	2699	3350
ENSG00000004534	RBM6	1483.01	1607	2255.26	2875	2766.45	3745
ENSG00000004660	CAMKK1	480	459	460	419	427	412
ENSG00000004700	RECQL	983.02	1276.14	804.12	859.05	722.76	2028.42
ENSG00000004766	VPS50	175	200	256	264	217	631
ENSG00000004776	HSPB6	12	16	16.37	13	10	15
ENSG00000004777	ARHGAP33	137	170.82	664	571.97	664.98	601.96
ENSG00000004779	NDUFAB1	1347	1174	1253	1342	1253	1000
ENSG00000004799	PDK4	1	13	20	13	25	55
ENSG00000004809	SLC22A16	0	0	0	0	0	0
ENSG00000004838	ZMYND10	72	64	104	95	103	69
ENSG00000004846	ABCB5	0	1	0	1	1	0
ENSG00000004848	ARX	0	3	3	3	4	6
ENSG00000004864	SLC25A13	930	1018	947	1098	1187	1468
ENSG00000004866	ST7	412.46	453.58	852.19	1078.07	1083.45	1384.49
ENSG00000004897	CDC27	1725.95	2510.94	2411.88	3075.93	2810	5476.85
ENSG00000004939	SLC4A1	0	1	1	4	1	2
ENSG00000004948	CALCR	0	0	0	0	0	0
ENSG00000004961	HCCS	1654	1672	2083	2368	2127	2176
ENSG00000004975	DVL2	3007	2859	5959.8	5413	6208	4478
ENSG00000005001	PRSS22	0	0	1	0	1	0
ENSG00000005007	UPF1	5712	5401	7306	6825	7230	5813
ENSG00000005020	SKAP2	165	279	170	194	164	302
ENSG00000005022	SLC25A5	14697.7	12689.6	11903.9	12651.6	12304.9	9213.78
ENSG00000005059	MCUB	717	747	504	600	550	599
ENSG00000005073	HOXA11	54.8	42	94	75	96.27	109.08
ENSG00000005075	POLR2J	2475.18	2281.12	2753.43	2865.18	2911.45	1956.82
ENSG00000005100	DHX33	1440	1932.84	1361	1696.46	1497	2138
ENSG00000005102	MEOX1	3	3	2	2	0	0
ENSG00000005108	THSD7A	0	1	2	6	0	1
ENSG00000005156	LIG3	1862.91	2052.09	1466.28	1396.81	1558.57	1608.71
ENSG00000005175	RPAP3	535	680	692	689	611	1504
ENSG00000005187	ACSM3	6.07	2	2.79	4	3.51	7.55
ENSG00000005189	REXO5	258	260	1073.96	1192.94	1559.96	1730
ENSG00000005194	CIAPIN1	1632	1443	2251.99	2242	2292.99	1370
ENSG00000005206	SPPL2B	610.14	620	1242	1071	1342	1063
ENSG00000005238	FAM214B	626	576	597	574	701	720
ENSG00000005243	COPZ2	890	747	893	832	902	559
ENSG00000005249	PRKAR2B	611	720	365	411	327	607
ENSG00000005302	MSL3	660	931	583.08	710	601	907
ENSG00000005339	CREBBP	2016	2900	3367.67	4104.05	4426	6351
ENSG00000005379	TSPOAP1	0	0	0	1	0	3
ENSG00000005381	MPO	0	1	1	0	0	0
ENSG00000005421	PON1	0	0	0	0	0	0
ENSG00000005436	GCFC2	179.52	210.97	237.05	273	228.89	509.85
ENSG00000005448	WDR54	2266	2154	2951	2629	2941	1712
ENSG00000005469	CROT	292	364	216	212	209	333
ENSG00000005471	ABCB4	1	0	2	0	1	7
ENSG00000005483	KMT2E	278	657.03	603.36	578	544	1365
ENSG00000005486	RHBDD2	1812	1957	5441	5130	5619	4601
ENSG00000005513	SOX8	0	0	0	0	2	1
ENSG00000005700	IBTK	274	578	440	520	425	1167
ENSG00000005801	ZNF195	62	100	214.91	224	193.01	493
ENSG00000005810	MYCBP2	472	998.98	614.49	870.95	821.08	1686.94
ENSG00000005812	FBXL3	459.67	601.73	939.27	1007.43	878.93	2006.39
ENSG00000005844	ITGAL	1	2	2	2	1	3
ENSG00000005882	PDK2	1137.5	1191.99	1321.41	1222.64	1309.56	1075.81
ENSG00000005884	ITGA3	19001	18884.2	9689	8334	8861	7109
ENSG00000005889	ZFX	193	432.54	675	728.57	676	1488.71
ENSG00000005893	LAMP2	1744	2672	1157	1472	1228.83	2147
ENSG00000005961	ITGA2B	101	115	352	281	310	184
ENSG00000005981	ASB4	0	0	0	1	0	0
ENSG00000006007	GDE1	1774.58	2084.24	1615	1853	1714	1982.78
ENSG00000006015	REX1BD	735	702.05	1157	955	963	479
ENSG00000006016	CRLF1	30.25	31.77	30.54	26.66	21.07	25.43
ENSG00000006025	OSBPL7	268	293	874	844	1003	899
ENSG00000006042	TMEM98	1951	1833	1808.01	1659	1828	1249.49
ENSG00000006047	YBX2	0	0	0	0	0	0
ENSG00000006059	KRT33A	0	2.04	3	0	2	1.02
ENSG00000006062	MAP3K14	2775.98	2805.52	16904.9	15451.3	16844.3	13267.6
ENSG00000006071	ABCC8	0	0	2	2	1	3
ENSG00000006116	CACNG3	0	0	0	0	0	0
ENSG00000006118	TMEM132A	4261.56	4400.51	5560.82	4773.8	5169.95	3796.67
ENSG00000006125	AP2B1	9213	12092	6472	7604	7980.99	10007
ENSG00000006128	TAC1	0	0	0	0	0	0
ENSG00000006194	ZNF263	1593.97	1538.75	3304.17	3247.42	3371.46	2874.18
ENSG00000006210	CX3CL1	1	1	8	3	3	7
ENSG00000006282	SPATA20	2976	2978	3327	2863	3379	2637
ENSG00000006283	CACNA1G	19	31	53	48	70	68.03
ENSG00000006327	TNFRSF12A	8939	8808	35887	30144	29524	15493
ENSG00000006377	DLX6	1	1	1	1	1	7
ENSG00000006432	MAP3K9	345	436	433	414	545	550.32
ENSG00000006451	RALA	2014	2029	1036	1242	987	1403
ENSG00000006453	BAIAP2L1	116.67	111.31	130.83	167.8	139.16	187.59
ENSG00000006459	KDM7A	13	23	160	176	139	306
ENSG00000006468	ETV1	65	70	47	40	51	105
ENSG00000006530	AGK	512	729.2	751.09	1084.53	912.06	1483
ENSG00000006534	ALDH3B1	1309.26	1230.3	1502.01	1288.95	1537	1184.03
ENSG00000006555	TTC22	0	0	0	0	0	0.99
ENSG00000006576	PHTF2	604	1016	461	508	439	842
ENSG00000006606	CCL26	196	157	192	156	184	111
ENSG00000006607	FARP2	794.97	1221.13	1355.18	1623.25	1751.86	2371.68
ENSG00000006611	USH1C	0	0	0	0	0	0
ENSG00000006625	GGCT	471.99	427.93	360.87	395	373	504.99
ENSG00000006634	DBF4	397	482.08	529	632	533	1174.35
ENSG00000006638	TBXA2R	112	136.26	33.19	30	38.14	37
ENSG00000006652	IFRD1	1012.78	1172.71	2710.4	3421.95	2728	4796.87
ENSG00000006659	LGALS14	0	0	0	0	0	0
ENSG00000006695	COX10	279.3	373.22	403.92	432.79	439.85	577.92
ENSG00000006704	GTF2IRD1	819	796	1936.12	1860.31	1981.84	1900.42
ENSG00000006712	PAF1	2798	2757	4092	4352	4589	4067
ENSG00000006715	VPS41	483	609	348	436	361	651
ENSG00000006740	ARHGAP44	328	367	354	422	466	419.24
ENSG00000006744	ELAC2	4119	3712	5272	5188	5908	4771
ENSG00000006747	SCIN	7.99	4	10	9	5.02	10.54
ENSG00000006756	ARSD	21	21.94	22	21	24.51	13
ENSG00000006757	PNPLA4	240	203	294	285	233	224
ENSG00000006788	MYH13	0	1	0	0	2	0
ENSG00000006831	ADIPOR2	4761	4918	5677	6292	6807	6845
ENSG00000006837	CDKL3	26.21	46.44	31.3	60.54	68	50.76
ENSG00000007001	UPP2	0	0	0	0	1	0
ENSG00000007038	PRSS21	0	0	0	0	0	0
ENSG00000007047	MARK4	879	910	796	731	813	645
ENSG00000007062	PROM1	0	2	0	1	0	0
ENSG00000007080	CCDC124	2950	2776	3899	3319	3417	2033
ENSG00000007129	CEACAM21	0	0	1	0	0	0
ENSG00000007168	PAFAH1B1	2425.06	3409.25	1618.51	1961.82	1716.19	2576.26
ENSG00000007171	NOS2	1	0	3	0	2	5
ENSG00000007174	DNAH9	0	0	2	0	2	0
ENSG00000007202	KIAA0100	14564.9	14495.1	8026.5	8209.57	10043.1	8907.89
ENSG00000007216	SLC13A2	1	7	4	2	4	3
ENSG00000007237	GAS7	1	0	1	1	4	2.05
ENSG00000007255	TRAPPC6A	208	158	308	262	265	106
ENSG00000007264	MATK	3	2	7	3	4	1
ENSG00000007306	CEACAM7	0	0	0	0	0	0
ENSG00000007312	CD79B	58	45	90	76	45	50
ENSG00000007314	SCN4A	0	0	0	1	0	0
ENSG00000007341	ST7L	413.17	416.27	721.49	770.76	873.37	1046.22
ENSG00000007350	TKTL1	1	4	1	4	5	7
ENSG00000007372	PAX6	37	62.95	56.52	71.82	54	89.9
ENSG00000007376	RPUSD1	1991.99	1966.98	3166.96	2605.98	2927.85	1979
ENSG00000007384	RHBDF1	1239	1379	3965	3635	4123	3299
ENSG00000007392	LUC7L	1269	1129	3131	3288	3428	3245
ENSG00000007402	CACNA2D2	19	17	38.54	20	28	42
ENSG00000007516	BAIAP3	48	39	109.01	100.01	155.03	96.01
ENSG00000007520	TSR3	2755	2444	3492.99	3060.99	3268.97	2092.99
ENSG00000007541	PIGQ	1578	1676	4037.16	3552.17	3916	3205
ENSG00000007545	CRAMP1	405.91	631.76	1253.92	1317.05	1492.85	1740.3
ENSG00000007866	TEAD3	1174	1315	1732	1585	1700	1511
ENSG00000007908	SELE	0	0	123	143	118	321
ENSG00000007923	DNAJC11	2519.83	2587.19	3430.84	3416.9	3915.05	3716.51
ENSG00000007933	FMO3	0	0	0	1	3	2
ENSG00000007944	MYLIP	61	98	342	417	408	627
ENSG00000007952	NOX1	0	1	2	0	0	0
ENSG00000007968	E2F2	724	677.21	5270	5093	5610	5040
ENSG00000008018	PSMB1	11114	8942	8842	9210	8833	5864
ENSG00000008056	SYN1	13	18	3	4	5	6
ENSG00000008083	JARID2	298	404	350	440	399	579
ENSG00000008086	CDKL5	153	300.71	364.42	492.11	453.28	947.03
ENSG00000008118	CAMK1G	19	19	122	102	91	95
ENSG00000008128	CDK11A	783.21	712.24	1818.18	1827.8	2287.44	2664.98
ENSG00000008130	NADK	2021.04	1973.55	2130.42	2144.16	2403.5	2151.57
ENSG00000008196	TFAP2B	0	0	0	0	0	0
ENSG00000008197	TFAP2D	0	0	0	0	0	0
ENSG00000008226	DLEC1	3.08	4.08	3.1	3.36	3.04	1.62
ENSG00000008256	CYTH3	2928	2928	2815	3098	2936	3022
ENSG00000008277	ADAM22	61	73	54	81	74	153
ENSG00000008282	SYPL1	1969	2211	1419	1679	1432	2371
ENSG00000008283	CYB561	9.03	14	11	10	15.02	10
ENSG00000008294	SPAG9	3361	5285.57	4390	5795.18	5015.49	8811
ENSG00000008300	CELSR3	1767.9	1861.2	2622.96	2489.15	2966.7	2196
ENSG00000008311	AASS	202.82	289.01	586.98	749	743	1519.87
ENSG00000008323	PLEKHG6	1	7	11	6	13	9
ENSG00000008324	SS18L2	337	332.92	236.1	281.83	311	280
ENSG00000008382	MPND	903.97	840.98	994.97	811.1	902	558.65
ENSG00000008394	MGST1	0	5	4.95	4	0	3
ENSG00000008405	CRY1	788	977	1378	1666	1560	2685
ENSG00000008438	PGLYRP1	0	0	0	0	0	0
ENSG00000008441	NFIX	1696	1676	1155	1180	1181	1261
ENSG00000008513	ST3GAL1	356	338	718	730	716	706
ENSG00000008516	MMP25	20.73	11.94	6.41	17.72	8.74	9.51
ENSG00000008517	IL32	1098	1075	5136	4998	4816	2725
ENSG00000008710	PKD1	2992.14	3391.47	3280.25	3093.28	3271.35	2749.56
ENSG00000008735	MAPK8IP2	4	5	14	16.02	31	25
ENSG00000008838	MED24	2134	2138.97	3104.08	3033	3234	2902
ENSG00000008853	RHOBTB2	2050.89	2012.29	3000.44	2685.13	3410.7	2857.25
ENSG00000008869	HEATR5B	378	782	278	414	388	801
ENSG00000008952	SEC62	288	402	340	420	338	807
ENSG00000008988	RPS20	14636.6	12386.9	10169	10404	10470.2	5268.32
ENSG00000009307	CSDE1	9103	12070	5091	6387	5212	8516.99
ENSG00000009335	UBE3C	3374	4294	2302	2624	2329	3422
ENSG00000009413	REV3L	81.09	193.65	244.79	233.05	179.54	588.58
ENSG00000009694	TENM1	20	38	10	23	13	31
ENSG00000009709	PAX7	0	0	0	0	0	0
ENSG00000009724	MASP2	4	11	5	9	5	15
ENSG00000009765	IYD	0	1	0	2.89	3.1	1
ENSG00000009780	FAM76A	201	225	281	382	285	430
ENSG00000009790	TRAF3IP3	0	2.03	1.01	1	3.02	7.1
ENSG00000009830	POMT2	609	609	579	568	691	578
ENSG00000009844	VTA1	1204	1106	1130.01	1311	1140	1898
ENSG00000009950	MLXIPL	3	4	18	16	12.27	11
ENSG00000009954	BAZ1B	3874	5880	8120	10802	10412	16882
ENSG00000010017	RANBP9	1023.97	1462.96	1896.09	2243.36	1949.23	3168.02
ENSG00000010030	ETV7	34	38.58	437	498.29	572.18	638.26
ENSG00000010072	SPRTN	160.74	190.19	293.89	355.11	281.81	526.96
ENSG00000010165	EEF1AKNMT	1786	1740	1833	1873	1984	1695
ENSG00000010219	DYRK4	255	234	280.89	384.98	374	351
ENSG00000010244	ZNF207	4234.27	5368.59	5250.83	6457.35	5304.11	8004.05
ENSG00000010256	UQCRC1	9230	8463	12808	10342	11436	6456
ENSG00000010270	STARD3NL	975	998	416	526	440	571
ENSG00000010278	CD9	3512	3468	1588	1653	1316	1310
ENSG00000010282	HHATL	0	0	0	0	0	0
ENSG00000010292	NCAPD2	14090.5	14862.3	18034.9	20516.4	21655	23346.2
ENSG00000010295	IFFO1	1303	1378	4216	3692.99	4391	3164.06
ENSG00000010310	GIPR	9	9.13	57.03	67	79	49
ENSG00000010318	PHF7	350	350	178	227	231.23	272.59
ENSG00000010319	SEMA3G	1	3	2	4	6	2
ENSG00000010322	NISCH	1874	2123	6388	6149	6584	5351
ENSG00000010327	STAB1	2.01	3	2	1	3	4
ENSG00000010361	FUZ	211.52	212.81	295.85	273.82	388.27	195.8
ENSG00000010379	SLC6A13	1	0	4	7	12	8
ENSG00000010404	IDS	708.56	688.94	347.35	427.23	398.5	490.5
ENSG00000010438	PRSS3	591	526	558	483	510	244
ENSG00000010539	ZNF200	208	243.01	587	767.1	670.03	1095
ENSG00000010610	CD4	75	81	68	59	71	59
ENSG00000010626	LRRC23	363.39	391.05	371.83	274.15	358.21	307.12
ENSG00000010671	BTK	0	0	1	1	1	0
ENSG00000010704	HFE	133.11	156	199	208.76	207.15	181.04
ENSG00000010803	SCMH1	602	721	1125.98	1234	1333	1538
ENSG00000010810	FYN	2204	2419	1519	1697	1942	2363
ENSG00000010818	HIVEP2	425	801	2189	3072	2492	4858
ENSG00000010932	FMO1	0	0	0	0	0	0
ENSG00000011007	ELOA	1935.8	2522.27	2685.01	3369.65	3404.04	4336.87
ENSG00000011009	LYPLA2	1093	1117	1442	1418	1417	1180
ENSG00000011021	CLCN6	367	519	1708.98	1834.99	2276	2807.62
ENSG00000011028	MRC2	4013.96	3808.99	3304	3014	3367.95	2679
ENSG00000011052	NME1-NME2	377.46	389.54	402.53	348.84	339.19	157.19
ENSG00000011083	SLC6A7	13	4	177	177	194	121
ENSG00000011105	TSPAN9	1816	1780	1538	1338	1371	1095
ENSG00000011114	BTBD7	411.69	675	246	285	260.04	479
ENSG00000011132	APBA3	293	328	557.09	545	579.69	395.69
ENSG00000011143	MKS1	576	602	1543	1437	1584	1193
ENSG00000011198	ABHD5	525	582	810	883	809	1077
ENSG00000011201	ANOS1	101	151	90	82	62	112
ENSG00000011243	AKAP8L	1033.04	1100.5	3733.73	3308.19	4232.1	3314.74
ENSG00000011258	MBTD1	89	166	216	258	194	467.01
ENSG00000011260	UTP18	2400	2041	2127	2740	2562	3141
ENSG00000011275	RNF216	1460.54	1489	1192.81	1273.91	1330.2	1457.98
ENSG00000011295	TTC19	732	916.89	2047.56	2340.99	2167.38	3036.11
ENSG00000011304	PTBP1	13613	13982	19821	21087	22331	22865
ENSG00000011332	DPF1	270	313	1421	1282	1475	1136
ENSG00000011347	SYT7	10	17	8	3	5	6
ENSG00000011376	LARS2	1336	1397	2267.97	2183	2391.06	2240.69
ENSG00000011405	PIK3C2A	146	259	163	167	165	519
ENSG00000011422	PLAUR	1361	1232	959	923	791	765
ENSG00000011426	ANLN	2980	4760	2524	2956	2362	6175
ENSG00000011451	WIZ	1682	1993	2037	1973	2247	2133
ENSG00000011454	RABGAP1	933	1517	1148.9	1488	1338	2229
ENSG00000011465	DCN	1	0	1	1	1	1
ENSG00000011478	QPCTL	371.9	351	448.47	422	461	344.73
ENSG00000011485	PPP5C	3135	3042.67	5405	4867	4881	3534
ENSG00000011523	CEP68	503	538.01	866	1013.19	862.16	1179.62
ENSG00000011566	MAP4K3	345	635	550	628	543	1230
ENSG00000011590	ZBTB32	2	7	7	6	13	3
ENSG00000011600	TYROBP	0	0	1	0	0	0
ENSG00000011638	TMEM159	274	268	298.28	269	343	227
ENSG00000011677	GABRA3	1125	1423	933	1114	1166	1418
ENSG00000012048	BRCA1	799.8	1393.18	1698.36	2028.68	1797.57	4128.91
ENSG00000012061	ERCC1	2715.44	2588.59	3332.18	3049.07	3179.97	2230.8
ENSG00000012124	CD22	9	15	41	40	50	48
ENSG00000012171	SEMA3B	1239	1354	1879	1470	1769	1233
ENSG00000012174	MBTPS2	511.43	778.14	466.7	562.79	417.54	959.08
ENSG00000012211	PRICKLE3	3.01	2	8.01	9.02	15.03	8.04
ENSG00000012223	LTF	0	0	1	2	1	1
ENSG00000012232	EXTL3	2164	2036	1326.84	1264.77	1319	1156.53
ENSG00000012504	NR1H4	0	0	7	7	2	16
ENSG00000012660	ELOVL5	2408	2971	1937	2448	1909	3008
ENSG00000012779	ALOX5	0	2	2	0	0	0
ENSG00000012817	KDM5D	301	336	640	739	779	917.97
ENSG00000012822	CALCOCO1	1635	1513	1809	1679	1736	1378
ENSG00000012963	UBR7	1942	2390	2734.99	3319	3253.99	4278
ENSG00000012983	MAP4K5	694	1094	1214	1426	1200	2899
ENSG00000013016	EHD3	700	728	446	408	442	526
ENSG00000013275	PSMC4	4199	3939	5291	5056	5112	3534
ENSG00000013288	MAN2B2	2168	2382.03	1775	1927	2229.15	2390.15
ENSG00000013293	SLC7A14	0	3	1	2	3	1
ENSG00000013297	CLDN11	4155	4871.92	1541.94	1747	1570	1898.49
ENSG00000013306	SLC25A39	5940	5809.9	5901	5421	6003.75	4500
ENSG00000013364	MVP	5103.07	4610.22	3657.35	3182.52	3397.46	2540.54
ENSG00000013374	NUB1	1358.99	1806	1614.99	2012	1810.9	2546.96
ENSG00000013375	PGM3	1175.26	1783.63	1839.94	2153.71	1686.83	3082.86
ENSG00000013392	RWDD2A	164.36	221	459.01	525	465	683
ENSG00000013441	CLK1	253	311	397	421	435	936
ENSG00000013503	POLR3B	284	413	179	221	208	382
ENSG00000013523	ANGEL1	526.25	493.07	749.3	696.04	911.95	713.83
ENSG00000013561	RNF14	818.19	1023	853.03	1101.42	1039.6	1488
ENSG00000013563	DNASE1L1	1440.03	1455.58	956.12	1019.36	1146.1	1102.51
ENSG00000013573	DDX11	2413.53	2417.8	12940.7	11541.4	13525.6	10426.1
ENSG00000013583	HEBP1	1425	1465	1712	1857	1675	1552
ENSG00000013588	GPRC5A	5669	6292	2042	2131	1840	1977
ENSG00000013619	MAMLD1	729	975	928	1073	943	1200
ENSG00000013725	CD6	0	0	0	1	3	2
ENSG00000013810	TACC3	8274.85	8062.85	13499.6	13022.6	13395.7	11183.6
ENSG00000014123	UFL1	170	317	162	170	134	360
ENSG00000014138	POLA2	2466.62	2235.6	5017.1	4852.53	5066.25	3876.6
ENSG00000014164	ZC3H3	655	709	1845	1731	1749	1615
ENSG00000014216	CAPN1	10992.7	10357.7	9924.91	8247.71	8811.53	6165.74
ENSG00000014257	ACP3	0	0	0	0	0	0
ENSG00000014641	MDH1	3386	3268.83	2185	2897	2532	3525
ENSG00000014824	SLC30A9	652	852	579.17	690	575	1305
ENSG00000014914	MTMR11	208.88	246.09	351.52	420.82	488.21	557.58
ENSG00000014919	COX15	883.17	1129	874.16	1009.12	728.47	962.95
ENSG00000015133	CCDC88C	7	1	4	11	6	15
ENSG00000015153	YAF2	356	313	647	718	626	1102
ENSG00000015171	ZMYND11	542	736	548	652	494	916
ENSG00000015285	WAS	9	2	2	6	6	13
ENSG00000015413	DPEP1	0	1	2	0	1	1
ENSG00000015475	BID	2511.01	2216	1975	1886.79	1711.9	1349.21
ENSG00000015479	MATR3	2956.68	3314.45	2676.6	2988.21	2509.48	5690.02
ENSG00000015520	NPC1L1	0	0	0	3	1	1
ENSG00000015532	XYLT2	1997	1976	922	915	958	808
ENSG00000015568	RGPD5	262.46	373.97	250.65	604.48	265.38	1115.34
ENSG00000015592	STMN4	1	0	8	6	12	5
ENSG00000015676	NUDCD3	2824	2581	4769	4161	4645	3276
ENSG00000016082	ISL1	24	16	50	47	44	63
ENSG00000016391	CHDH	3	0	0	1	7	5
ENSG00000016402	IL20RA	0	0	0	0	0	0
ENSG00000016490	CLCA1	0	0	0	0	0	0
ENSG00000016602	CLCA4	0	0	0	0	0	0
ENSG00000016864	GLT8D1	728.18	926.7	395.17	443.15	466.29	648.35
ENSG00000017260	ATP2C1	1603.71	2163.71	1359.01	1741.07	1560.28	2802.51
ENSG00000017427	IGF1	0	0	1	0.64	0.84	0.24
ENSG00000017483	SLC38A5	171	147	209	161	195	151
ENSG00000017797	RALBP1	3744.72	4324.2	2785.19	3483.5	3358.85	4699.31
ENSG00000018189	RUFY3	246	321	273	347	279	482
ENSG00000018236	CNTN1	0	0	0	0	0	0
ENSG00000018280	SLC11A1	5	5	6	6	8	4
ENSG00000018408	WWTR1	348.82	447.22	666.59	734.33	710.93	994.13
ENSG00000018510	AGPS	692	836.57	785.02	866.39	756.92	1476.87
ENSG00000018607	ZNF806	6	5	3	4	2	0
ENSG00000018610	CXorf56	1070.97	928.92	922.95	1002.99	932.52	906.9
ENSG00000018625	ATP1A2	2	7	12	11	7	14
ENSG00000018699	TTC27	538	757	806	1069	850	1257
ENSG00000018869	ZNF582	7	2	27.86	43	20.54	51.43
ENSG00000019102	VSIG2	14	4	2	2	9	1
ENSG00000019144	PHLDB1	3331.99	3445.85	8424.87	7718.31	8661.73	7083
ENSG00000019169	MARCO	12	9	5	2	5	4
ENSG00000019186	CYP24A1	2	4	12	7	4	1
ENSG00000019485	PRDM11	339	354	527	485	546	401
ENSG00000019505	SYT13	5	2	5	3	3	6
ENSG00000019549	SNAI2	275	361	1265	1413	1121	1955
ENSG00000019582	CD74	4	8.02	10.25	7.15	13.45	25
ENSG00000019991	HGF	0	3	0	1	0	0
ENSG00000019995	ZRANB1	582.53	766.53	1058.64	1314.85	1345.31	1854.66
ENSG00000020129	NCDN	1452	1499.69	1782.42	1805.57	1850	1444.49
ENSG00000020181	ADGRA2	514.27	577.79	391.87	448.47	521.72	520.1
ENSG00000020219	CCT8L1P	0	0	0	0	0	0
ENSG00000020256	ZFP64	529	633	902	968	1010	1098
ENSG00000020426	MNAT1	748.4	623	860	1062	776	1263
ENSG00000020577	SAMD4A	1275	2012	3341	3932	3596	5441
ENSG00000020633	RUNX3	139	161	198	169	209	182
ENSG00000020922	MRE11	444.97	649	600.08	755	584	1309.61
ENSG00000021300	PLEKHB1	0	1	1	0	3	0
ENSG00000021355	SERPINB1	260	301.78	552	664	571	619
ENSG00000021461	CYP3A43	1	0	0	0	0	0
ENSG00000021488	SLC7A9	0	0	3	0	2	5
ENSG00000021574	SPAST	203	309.09	139.03	148.25	139	288.7
ENSG00000021645	NRXN3	184	306	93	122	99.19	187.04
ENSG00000021762	OSBPL5	611	547	1106	988	1144	757
ENSG00000021776	AQR	616	1246	942	1208	1133	2363
ENSG00000021826	CPS1	295	517.32	202.02	262	245	435
ENSG00000021852	C8B	0	0	0	0	0	0
ENSG00000022267	FHL1	3530	4547	2768	3180	3001	4076
ENSG00000022277	RTF2	5280.75	4734	5706	5970.26	5688	4452.1
ENSG00000022355	GABRA1	0	0	0	0	0	0
ENSG00000022556	NLRP2	158	175	273	259	265	263.95
ENSG00000022567	SLC45A4	254	270	387	394	514	492
ENSG00000022840	RNF10	4915	5276.01	4618	5224.03	5926	6120
ENSG00000022976	ZNF839	287.03	302.71	556.43	531.33	593.57	614.7
ENSG00000023041	ZDHHC6	590	647	610	769	715	964
ENSG00000023171	GRAMD1B	312	369	385	405	439	507
ENSG00000023191	RNH1	4540	4309	4999.02	4359	4585.23	3126
ENSG00000023228	NDUFS1	3162	3563.27	3935.88	4556.94	3698.53	4707.04
ENSG00000023287	RB1CC1	205	241	181	194	203	548
ENSG00000023318	ERP44	901	1196	891	1047	1059	1492
ENSG00000023330	ALAS1	2612	2487	4660	5076	4869	4378
ENSG00000023445	BIRC3	229	419	3598.94	4129.83	2882.99	8399.97
ENSG00000023516	AKAP11	384	748	529	617	540	1596
ENSG00000023572	GLRX2	627.69	549.39	646.38	752.77	691.83	777.57
ENSG00000023608	SNAPC1	1437	1591	2466.96	3135.94	2273	4905
ENSG00000023697	DERA	811	878	872	1064	846	1171
ENSG00000023734	STRAP	2900	3290	1826	2297	1941	2833
ENSG00000023839	ABCC2	24	40	54	83	59	128
ENSG00000023892	DEF6	45	49	72	37	63	43
ENSG00000023902	PLEKHO1	2039.05	1837.23	1705.34	1680.51	1732.9	1381
ENSG00000023909	GCLM	926.99	1013	866	1066	875.81	1261
ENSG00000024048	UBR2	321	545	593	842	765	1373
ENSG00000024422	EHD2	6174.98	6294	4019	3546	3870	3330
ENSG00000024526	DEPDC1	452.93	648.89	495.93	558	436	1231.88
ENSG00000024862	CCDC28A	226	263	305	389	317	369
ENSG00000025039	RRAGD	194	245	125	124	98	173
ENSG00000025156	HSF2	331	475	820	1035	942	1726
ENSG00000025293	PHF20	1054.98	1536	1157	1398	1138.4	1913.64
ENSG00000025423	HSD17B6	3	10.03	11.09	7.34	7	14
ENSG00000025434	NR1H3	59	61	138	142	164	139
ENSG00000025708	TYMP	64.12	51.28	101.54	96.89	120.75	52.63
ENSG00000025770	NCAPH2	5197.58	4651.97	9911.02	8371.81	9572.21	5960.32
ENSG00000025772	TOMM34	3775	3693	4220	4536	4393	4071
ENSG00000025796	SEC63	1009.34	1513.42	911.58	1059.82	898.41	1876.17
ENSG00000025800	KPNA6	2885.85	3367.28	2726.56	3118.65	2929.31	3551.36
ENSG00000026025	VIM	137600	149649	96131.7	107827	100359	115315
ENSG00000026036	RTEL1-TNFRSF6B	315.19	426.67	1261.29	1198.61	1428.59	1255.95
ENSG00000026103	FAS	48.77	66.97	31	65.28	37.81	125.97
ENSG00000026297	RNASET2	381	336	268.82	299.9	311.01	229
ENSG00000026508	CD44	15882	18967	13478	15365	14048	16456
ENSG00000026559	KCNG1	189	182	109.08	87.1	120	82.2
ENSG00000026652	AGPAT4	127	225	289	259	343	339
ENSG00000026751	SLAMF7	6	12	19	20.44	12	33
ENSG00000026950	BTN3A1	172.61	190.27	91.67	99.58	108.42	112.33
ENSG00000027001	MIPEP	766.09	658	733	795	810	841
ENSG00000027075	PRKCH	95	97.67	138	169.63	134.87	187
ENSG00000027644	INSRR	6	4	2	2	3	3
ENSG00000027697	IFNGR1	377	473	337	452	328	645
ENSG00000027847	B4GALT7	1158.54	1215	1824	1595	1757	1282.78
ENSG00000027869	SH2D2A	0	2	3	2	2	6
ENSG00000028116	VRK2	128.96	197.81	234.18	282.19	266.43	504.46
ENSG00000028137	TNFRSF1B	1669	1516.42	1643	1605.97	1525	1306.02
ENSG00000028203	VEZT	387	751	682	813	719	1641.03
ENSG00000028277	POU2F2	241	302	282	276	288	334
ENSG00000028310	BRD9	3832.05	3567.43	6499.01	6815.79	7640.72	6729.02
ENSG00000028528	SNX1	2905	3048	3295.19	3556	3328	3245
ENSG00000028839	TBPL1	294.44	309.29	335.16	448.52	447.4	631.17
ENSG00000029153	ARNTL2	1286	2049	1270	1680.08	1526	2567
ENSG00000029363	BCLAF1	930	1795	1838	2205	1715	5096
ENSG00000029364	SLC39A9	1963	2700.07	1976.07	2405	2511.39	3304.6
ENSG00000029534	ANK1	28	54	41	37	44	64
ENSG00000029559	IBSP	0	0	0	3	0	0
ENSG00000029639	TFB1M	372.06	387.52	448.49	482.21	461.31	591.6
ENSG00000029725	RABEP1	1252.63	1608.11	1235.44	1444.75	1426.11	2507.04
ENSG00000029993	HMGB3	1202.99	1244.94	936	1078.99	884	1324.97
ENSG00000030066	NUP160	793	1127	1111	1394	1164	2009
ENSG00000030110	BAK1	1033.91	928.59	1072.01	807.72	939.92	667.66
ENSG00000030304	MUSK	0	0	0	1	3	6
ENSG00000030419	IKZF2	21	30	18	20	26	48
ENSG00000030582	GRN	8963	9313	6782	6165	6237	5353
ENSG00000031003	FAM13B	773	1353.99	1744.97	2225.99	2134.99	3997.99
ENSG00000031081	ARHGAP31	1013	1206	1064	1254	1267	1507
ENSG00000031691	CENPQ	325	185	441	604	449	711
ENSG00000031698	SARS1	5291	4570	5955	5797	5763	4479
ENSG00000031823	RANBP3	2160	2293	3230	3185	3524	3489
ENSG00000032219	ARID4A	94	162	378	440	383	1198
ENSG00000032389	EIPR1	834	826	1315	1216	1349	928
ENSG00000032444	PNPLA6	2127.64	2109.53	1073.5	942.09	1163.04	801
ENSG00000032742	IFT88	132	171	195	250	239	456
ENSG00000033011	ALG1	1328.1	1181.16	1490.75	1408.11	1600.76	1141.01
ENSG00000033030	ZCCHC8	329	497	1106.29	1424.15	1433.03	2527.11
ENSG00000033050	ABCF2	3632.27	3370.49	3070.58	2996.37	2901.2	2499.56
ENSG00000033100	CHPF2	1852	1802.19	698	632	668	484
ENSG00000033122	LRRC7	4	8.47	24.02	19.04	31.54	36.9
ENSG00000033170	FUT8	756.01	1351.73	493.35	607.53	634.43	1137.5
ENSG00000033178	UBA6	509	759	722	791	681.01	1712
ENSG00000033327	GAB2	1729	1841	3806	4130	4386	4101.99
ENSG00000033627	ATP6V0A1	858	989.15	1193	1258	1548.07	1668.07
ENSG00000033800	PIAS1	327.17	552.62	487.85	601.62	546.92	1135.27
ENSG00000033867	SLC4A7	339	511	647	593	539	1472
ENSG00000034053	APBA2	135	107	135	125	159	103
ENSG00000034152	MAP2K3	3332	3272	12432	11203	11752	8992
ENSG00000034239	EFCAB1	0	0	0	0	0	0
ENSG00000034510	TMSB10	78636	71784	70240	69073	69382.9	41344
ENSG00000034533	ASTE1	79.29	127.29	163.99	215.93	170.72	311.49
ENSG00000034677	RNF19A	220	407	530	705	522	1101
ENSG00000034693	PEX3	341	314	315	361	298.96	494
ENSG00000034713	GABARAPL2	1095	1142	1033	1160	1020	990
ENSG00000034971	MYOC	0	0	5	0	2	2
ENSG00000035115	SH3YL1	43	53	70	54	47	72
ENSG00000035141	FAM136A	1706	1546	1446	1526	1529	1568
ENSG00000035403	VCL	11715.6	14152	14383	19002.5	18559.9	26171.3
ENSG00000035499	DEPDC1B	364	540.97	488	560	438	866
ENSG00000035664	DAPK2	121.1	102.01	187	165	221	167.42
ENSG00000035681	NSMAF	586	786	622	751	736	1065
ENSG00000035687	ADSS2	470	607	485	565	436	927
ENSG00000035720	STAP1	0	0	0	0	2	0
ENSG00000035862	TIMP2	18479.5	19564.3	8254.24	8066.65	8800.04	8542.81
ENSG00000035928	RFC1	1237	2018	2153	2675	2114	4649
ENSG00000036054	TBC1D23	435	748	762	858	733	1934
ENSG00000036257	CUL3	1324	1849	319	418	288	562
ENSG00000036448	MYOM2	33	49	76	61	39	30
ENSG00000036473	OTC	1	0	2	0	1	0
ENSG00000036530	CYP46A1	19	14	31	24	23	36
ENSG00000036549	ZZZ3	229	331	431	481	500	1134
ENSG00000036565	SLC18A1	0	0	0	0	0	0
ENSG00000036672	USP2	10	16.31	28	26	31	24
ENSG00000036828	CASR	7.1	20.99	7.26	11.98	8.15	26.4
ENSG00000037042	TUBG2	1113.4	1271.6	1828	1843.45	2159.36	1925.92
ENSG00000037241	RPL26L1	2255.98	2043	1769	2175	1989	1718.99
ENSG00000037280	FLT4	94	92	137	118	161	112
ENSG00000037474	NSUN2	5676	6034	6657	7668	7555	9170
ENSG00000037637	FBXO42	643	796.02	1285	1533	1499	1664.01
ENSG00000037749	MFAP3	248	508	462	652.64	564	1087
ENSG00000037757	MRI1	716.98	685.98	1129.76	1110.66	1259.2	981.88
ENSG00000037897	METTL1	749.55	633.78	1073.3	1005.07	1018.08	698.6
ENSG00000037965	HOXC8	111	117	83	112	88	124
ENSG00000038002	AGA	125	99	138	187	159	239
ENSG00000038210	PI4K2B	947	903	1064.8	1341.31	1045.2	1910.8
ENSG00000038219	BOD1L1	687	1322	1028.04	1133	985	2777
ENSG00000038274	MAT2B	1384	1814	1606	1958	1590	2617
ENSG00000038295	TLL1	74	88	68	94	85	124
ENSG00000038358	EDC4	3014.46	2940.32	4364.79	3817.53	4524.64	3606.03
ENSG00000038382	TRIO	20146	28037	26574	32785	28467	37890
ENSG00000038427	VCAN	49	84.13	65	63	59	113
ENSG00000038532	CLEC16A	1183	1434	1101	1292	1454	1627
ENSG00000038945	MSR1	1	2	0	2	1	1
ENSG00000039068	CDH1	0	0	1	2.33	1	4
ENSG00000039123	MTREX	646.6	874.86	362.56	431.51	361.76	936.36
ENSG00000039139	DNAH5	94	130	245.98	315	226	396
ENSG00000039319	ZFYVE16	185.62	394.74	442.07	468.1	335.9	1297.79
ENSG00000039523	RIPOR1	2904	3044	6624	6109	6757	5290.89
ENSG00000039537	C6	0	0	0	0	1	1
ENSG00000039560	RAI14	2849	5054	3059.36	3505	2967.94	6565.71
ENSG00000039600	SOX30	0	2	7	6	20	15
ENSG00000039650	PNKP	1121.23	1009.15	2851.13	2338.69	2647.75	1673.46
ENSG00000039987	BEST2	0	2	1	1	3	6
ENSG00000040199	PHLPP2	648.87	1127.94	990.5	1290.89	1125.89	1924.35
ENSG00000040275	SPDL1	1191	1834	1333	1470	1136	2654
ENSG00000040341	STAU2	315.89	414.8	289.26	326.39	332.55	662.89
ENSG00000040487	SLC66A1	1079	1158.29	3097.75	3085.45	3153	2602
ENSG00000040531	CTNS	552.03	644.02	761.02	871.86	892.04	777.03
ENSG00000040608	RTN4R	81	80	69	57	57	35
ENSG00000040633	PHF23	1640	1639	1542	1423	1360	1039
ENSG00000040731	CDH10	4	3	0	0	0	3
ENSG00000040933	INPP4A	912	1231	771	852	922	1253
ENSG00000041353	RAB27B	18.03	30	13	12	14	27.85
ENSG00000041357	PSMA4	4161	3147	2532	3160	2675	3194
ENSG00000041515	MYO16	2	3	3	2	4	3
ENSG00000041802	LSG1	2448	2957	3968.97	4798.98	4395.01	5705.99
ENSG00000041880	PARP3	693	714	797	834	887	822
ENSG00000041982	TNC	5833	5903	8838	9677	8758	8917
ENSG00000041988	THAP3	583.17	548.81	1677.16	1526.1	1615.95	870.49
ENSG00000042062	RIPOR3	21	17	72	71	89	54
ENSG00000042088	TDP1	491.16	636	671.99	729.97	846	945
ENSG00000042286	AIFM2	1178	1144	2071	1897	1744.62	1316
ENSG00000042304	C2orf83	0	0	1	0	0	0
ENSG00000042317	SPATA7	71	77	164	199.05	156	314
ENSG00000042429	MED17	814.77	1003.15	1325.04	1518.17	1395.68	1893.72
ENSG00000042445	RETSAT	647.97	631.84	1252.87	1284.7	1500.04	1188.79
ENSG00000042493	CAPG	108	93	123	84	88	49
ENSG00000042753	AP2S1	3265	2949	2618	2077	2343	1163
ENSG00000042781	USH2A	0	2	0	3	4	1
ENSG00000042813	ZPBP	0	0	0	0	0	0
ENSG00000042832	TG	2	0	0	0	0	2
ENSG00000042980	ADAM28	0	0	0	0	0	0
ENSG00000043039	BARX2	0	0	0	0	2	2
ENSG00000043093	DCUN1D1	310	320	300	320	282	578
ENSG00000043143	JADE2	2906	2964	2699	2927	3073	2884
ENSG00000043355	ZIC2	92	116	126	132	114	150
ENSG00000043462	LCP2	2	1	5	0	0	3
ENSG00000043514	TRIT1	368	505	856	1186	1166	1715
ENSG00000043591	ADRB1	17	10	5	6	10	13
ENSG00000044012	GUCA2B	0	0	0	0	0	0
ENSG00000044090	CUL7	1660	1662.27	1788.25	1643.4	1894.81	1564.36
ENSG00000044115	CTNNA1	17264	18149	13603	15731	14413	17492
ENSG00000044446	PHKA2	1067.7	1314.54	1273.9	1434.55	1508.47	1588.1
ENSG00000044459	CNTLN	132	191.44	241.03	348.36	254	585
ENSG00000044524	EPHA3	0	0	0	0	0	0
ENSG00000044574	HSPA5	19792	20701	6972	7801	6955	8336.02
ENSG00000046604	DSG2	135	163	74	96	72.23	169
ENSG00000046647	GEMIN8	109.45	162.51	226.04	245	261.66	315.13
ENSG00000046651	OFD1	103	211	197	284	254	519
ENSG00000046653	GPM6B	4	4	4	1	7	4
ENSG00000046774	MAGEC2	18	12	11	17	11	18
ENSG00000046889	PREX2	0	0	0	0	0	0
ENSG00000047056	WDR37	336	459.56	300.3	438	385	424
ENSG00000047188	YTHDC2	433	680	748	934	780	1897
ENSG00000047230	CTPS2	361	419	425	422	528	636
ENSG00000047249	ATP6V1H	529	644	621	713	645	880
ENSG00000047315	POLR2B	1881.12	3275.09	531.09	663.21	492.12	1131.68
ENSG00000047346	FAM214A	61	71	125	136	168	331.87
ENSG00000047365	ARAP2	15	19	34	37	24	69
ENSG00000047410	TPR	610	1309	769	813	754	2705
ENSG00000047457	CP	0	2.03	2	1.03	1	2.03
ENSG00000047578	KIAA0556	563.94	719.96	1044.95	1067.91	1230.88	1214.83
ENSG00000047579	DTNBP1	662	693	1225	1158	1222	949
ENSG00000047597	XK	0	0	0	0	0	0
ENSG00000047617	ANO2	24	10	7	9	8	11
ENSG00000047621	C12orf4	424	547	699	842	745	1537
ENSG00000047634	SCML1	369	499	523	605	472	982
ENSG00000047644	WWC3	1047	1181	924	1090	1105	1509
ENSG00000047648	ARHGAP6	131	170	205	232	228	359
ENSG00000047662	FAM184B	0	1.1	1.09	0	0	0
ENSG00000047849	MAP4	18110	19974	12515.8	13908.8	14498.7	16672
ENSG00000047932	GOPC	360	620	629.97	751	647	1318
ENSG00000047936	ROS1	4	0	0	1	1	4
ENSG00000048028	USP28	208	412	322	475	475	810
ENSG00000048052	HDAC9	105	159.01	297	403	353	728.99
ENSG00000048140	TSPAN17	3887	3538	3154	2627	2739	1911
ENSG00000048162	NOP16	1457.65	1281.07	1181.18	1108.53	1131.91	685.41
ENSG00000048342	CC2D2A	405.66	592	381.09	471.96	437.92	566.17
ENSG00000048392	RRM2B	128	217	187	189	158	509.93
ENSG00000048405	ZNF800	101	205	254	325	250	559
ENSG00000048462	TNFRSF17	4	1	3	4	2	0
ENSG00000048471	SNX29	640.97	728	762.97	906	1067.9	1150.79
ENSG00000048540	LMO3	0	0	0	0	0	0
ENSG00000048544	MRPS10	1035.99	1170	1127.89	1458	1209	1584
ENSG00000048545	GUCA1A	0	0	0	0	0	0
ENSG00000048649	RSF1	418.35	843.6	917.93	1025.43	832.64	2442.78
ENSG00000048707	VPS13D	757	1293	955	1319	1317	2033
ENSG00000048740	CELF2	9	13	11	8	10	14
ENSG00000048828	FAM120A	2823.83	4125.25	1827.42	2237.45	2123.44	3250.65
ENSG00000048991	R3HDM1	406	668	543	669	713.48	1171
ENSG00000049089	COL9A2	20	16	15	18	19	16
ENSG00000049130	KITLG	136	228	470	515	440	1078
ENSG00000049167	ERCC8	367.78	460.65	440.58	507.13	466.18	717.85
ENSG00000049192	ADAMTS6	517	880	1368	1682	1549	3104
ENSG00000049239	H6PD	2635.02	2915.77	2955.05	2921	2866.05	2798
ENSG00000049245	VAMP3	2679	3722.35	2065	2488	2226.89	3255
ENSG00000049246	PER3	278.9	530.87	500.59	614.51	668.66	1335.94
ENSG00000049247	UTS2	0	0	0	0	1	0
ENSG00000049249	TNFRSF9	275	339	2396.9	2630	2345.22	2669.74
ENSG00000049283	EPN3	1	0	0	1	1	0
ENSG00000049323	LTBP1	494	461	196	212.97	266	283
ENSG00000049449	RCN1	4818.92	5137.55	3125.98	3841.61	3187.86	4714.56
ENSG00000049540	ELN	4	0	7	4	5	1
ENSG00000049541	RFC2	4740.49	4314.23	12479.8	11648.3	11953.1	8112
ENSG00000049618	ARID1B	1032.08	1440.48	1171.43	1574.48	1447.8	2199.87
ENSG00000049656	CLPTM1L	9692	9502	9889	9715	10523	9125
ENSG00000049759	NEDD4L	780	1085	2976.07	3750	3116.73	4715
ENSG00000049768	FOXP3	5	9	3	7	7	10
ENSG00000049769	PPP1R3F	101.86	120.73	239.91	211.91	220.75	171.51
ENSG00000049860	HEXB	2510.35	2539.17	2313.08	2810.32	2786.23	3374.35
ENSG00000049883	PTCD2	226	394	390	576	531.98	956.02
ENSG00000050030	NEXMIF	0	0	0	0	0	0
ENSG00000050130	JKAMP	832	834	450	553	442.61	773
ENSG00000050165	DKK3	7457.42	7567.25	5171.21	5315.19	5430.2	4910.94
ENSG00000050327	ARHGEF5	127.98	123.88	283.88	323.04	361.29	325.42
ENSG00000050344	NFE2L3	1486.99	1637	671	836	561	942
ENSG00000050393	MCUR1	1071	1096	832	1050	982	1268
ENSG00000050405	LIMA1	1543	2608	2431	3088	2452	4790
ENSG00000050426	LETMD1	482.87	540.09	1218	1312	1456	1289.59
ENSG00000050438	SLC4A8	1006	1239.07	1107.25	1336.02	1375.4	1697.1
ENSG00000050555	LAMC3	0	0	0	0	0	0
ENSG00000050628	PTGER3	0	0	0	0	0	0
ENSG00000050730	TNIP3	2	1	7	12	12	20
ENSG00000050748	MAPK9	1126	1702.09	1088	1336	1226	2079.02
ENSG00000050767	COL23A1	3.35	0	0	4.4	11.16	18.94
ENSG00000050820	BCAR1	5297	5282	12988	11756.6	12780	9922
ENSG00000051009	FAM160A2	454	492	903	853	890	675
ENSG00000051108	HERPUD1	774	847	721.15	615	623	663
ENSG00000051128	HOMER3	2786.09	2511.57	2735.93	2327.79	2686.13	1702.66
ENSG00000051180	RAD51	1166	1076.01	2556	2413	2707	1723.18
ENSG00000051341	POLQ	230	477	532	621	605	1447
ENSG00000051382	PIK3CB	523	627	292	343	321	546
ENSG00000051523	CYBA	4043	3706	5049	4051	4447	2115
ENSG00000051596	THOC3	2930.85	2724.69	3908.26	3433.9	3612.18	2723.27
ENSG00000051620	HEBP2	348	248	244	281	309	326
ENSG00000051825	MPHOSPH9	194.98	427.23	357.02	400.39	476.17	1192.44
ENSG00000052126	PLEKHA5	344	543.06	615.03	748	549	1333
ENSG00000052344	PRSS8	0	0	3	5	0	7
ENSG00000052723	SIKE1	366	529	456	518	463	774
ENSG00000052749	RRP12	2265	1990	5478.34	4768.95	5301.58	3723.97
ENSG00000052795	FNIP2	121	221	168	213	197	394
ENSG00000052802	MSMO1	797.52	999.31	326	353	280.24	483
ENSG00000052841	TTC17	378	513	989	1313	1128	1807
ENSG00000052850	ALX4	0	1	1	0	1	4
ENSG00000053108	FSTL4	2	2	127.54	144.28	190	101
ENSG00000053254	FOXN3	437.17	665.27	559.79	647.57	689.46	1039.94
ENSG00000053328	METTL24	0	0	2	0	2	1
ENSG00000053371	AKR7A2	2702.45	2532.89	3586.98	3229.81	3603.95	2331.43
ENSG00000053372	MRTO4	3416.48	2960	4376.81	3862.84	3881	2599.97
ENSG00000053438	NNAT	9	6	2	2	1	9
ENSG00000053501	USE1	203	176	439.07	394	384.18	240.11
ENSG00000053524	MCF2L2	6	8	5	1.02	16.01	10
ENSG00000053702	NRIP2	17	12	24	33.6	46	29.17
ENSG00000053747	LAMA3	160	223	449	571	577	757
ENSG00000053770	AP5M1	253	368	371	437	458	909
ENSG00000053900	ANAPC4	208	306	305	348	349	749
ENSG00000053918	KCNQ1	0	0	0	0	2	0
ENSG00000054116	TRAPPC3	1655	1529	1649	1643	1651	1158
ENSG00000054118	THRAP3	5233.94	5732	6485.44	8275.68	7018.7	10241.9
ENSG00000054148	PHPT1	2795.8	2484.47	3656.47	2826.26	3229.13	1253.54
ENSG00000054179	ENTPD2	0	0	3	2	2	0
ENSG00000054219	LY75	0	0	0	0	1	0
ENSG00000054267	ARID4B	156.51	204.99	379.94	388.61	353.26	1041.78
ENSG00000054277	OPN3	11.12	44.84	30	14.36	16.22	38.84
ENSG00000054282	SDCCAG8	81.75	123.36	140.88	142.86	133.93	269.78
ENSG00000054356	PTPRN	590	644	848	764	918	747
ENSG00000054392	HHAT	81	87	125	133	132	188
ENSG00000054523	KIF1B	1686.79	2581.58	1530.3	1780.7	1734.55	2715.43
ENSG00000054598	FOXC1	217	278	282	363.05	292	463
ENSG00000054611	TBC1D22A	857	869	1043	1063.02	1118	955
ENSG00000054654	SYNE2	872	1764	1084.17	1123	1045	3305.03
ENSG00000054690	PLEKHH1	46.09	79.44	112.18	105.03	120.08	218.81
ENSG00000054793	ATP9A	1095	1322	585	776	738	972
ENSG00000054796	SPO11	0	0	0	0	0	0
ENSG00000054803	CBLN4	0	0	0	0	0	0
ENSG00000054938	CHRDL2	0	2	0	0	0	1
ENSG00000054965	FAM168A	3026	3346	2576	2913	3025	3359
ENSG00000054967	RELT	1555	1640	4799	4297	4874	3522
ENSG00000054983	GALC	140	193	91	125	115	189
ENSG00000055044	NOP58	448	711.58	999.06	1175.38	928.4	2132.81
ENSG00000055070	SZRD1	8600	8563	7176	6842	6965	5747
ENSG00000055118	KCNH2	6	6	8	5	9	17
ENSG00000055130	CUL1	1045.55	1281	464	563.82	423	672
ENSG00000055147	FAM114A2	259	368	358	407	323	611
ENSG00000055163	CYFIP2	803	915.99	773	792.62	955.6	1006
ENSG00000055208	TAB2	974	1755	2506	2980	2510	5423
ENSG00000055211	GINM1	668	968.85	664	786	648	1077.03
ENSG00000055332	EIF2AK2	951	1431	879.59	1062	839.04	1553.05
ENSG00000055483	USP36	2289	2642	6823	7229	7919	8603
ENSG00000055609	KMT2C	495.7	872.68	426.95	466.83	405.29	957.51
ENSG00000055732	MCOLN3	66	102	110	153	144	284
ENSG00000055813	CCDC85A	757.37	951.17	729.09	945.15	901.24	1424.72
ENSG00000055917	PUM2	762	1276	978	1195	987	2131
ENSG00000055950	MRPL43	1908	1852.17	2531.94	2322.98	2450.74	1539.51
ENSG00000055955	ITIH4	4.3	2.09	9.85	5.7	19.57	11.75
ENSG00000055957	ITIH1	0	0	0	0	0	0
ENSG00000056050	HPF1	147	150	185	200	195	306
ENSG00000056097	ZFR	1965	3903	3731	4732	4041	8863
ENSG00000056277	ZNF280C	28	61	209.19	223.05	202	482
ENSG00000056291	NPFFR2	0	5	0	0	0	0
ENSG00000056487	PHF21B	6	7	31	44	40	40
ENSG00000056558	TRAF1	1103	1151.72	15802.3	15412.1	14960.1	11321.3
ENSG00000056586	RC3H2	389	707	784	870	861	1865
ENSG00000056736	IL17RB	18.69	33.22	14.76	15.77	15.53	31.37
ENSG00000056972	TRAF3IP2	260.4	288.07	311.32	380.05	356.28	414
ENSG00000056998	GYG2	284.9	353.52	186	173	243	200
ENSG00000057019	DCBLD2	3232.31	5602	2968	3678.65	3042	6256.94
ENSG00000057149	SERPINB3	0	0	0	0	0	0
ENSG00000057252	SOAT1	747.33	1115	875.86	1144	943	1536
ENSG00000057294	PKP2	154	223	390.99	471.02	406	646
ENSG00000057468	MSH4	0	0	0	1	1	1
ENSG00000057593	F7	1	0	0	2	1	0
ENSG00000057608	GDI2	1991	2962	2140	2677	2568	3693
ENSG00000057657	PRDM1	5	8	11	20	13	21
ENSG00000057663	ATG5	689	569	498	660	598	974
ENSG00000057704	TMCC3	25	38	96	98	83	133
ENSG00000057757	PITHD1	1652	1569	3884	3873	3962	3427
ENSG00000057935	MTA3	618	806	771.02	1025	901	1345.16
ENSG00000058056	USP13	211	361	308	373	331	507
ENSG00000058063	ATP11B	353	598.98	374	431.6	307	769
ENSG00000058085	LAMC2	540	515.01	711	764	670	661
ENSG00000058091	CDK14	578	844	586	773	635.03	1185
ENSG00000058262	SEC61A1	11327	11279.7	7231.99	7088.02	7640.05	6748.38
ENSG00000058272	PPP1R12A	865.2	1730.18	1308.44	1562.64	1183.88	3149.03
ENSG00000058335	RASGRF1	67.82	96.94	235.59	279.29	223.59	263.5
ENSG00000058404	CAMK2B	7	2	4	7	1	6
ENSG00000058453	CROCC	557.52	592.98	527.39	456.15	628.91	525.55
ENSG00000058600	POLR3E	942.79	984.4	791.67	742.38	755.56	704.42
ENSG00000058668	ATP2B4	2841	4293	1160	1438	1421	2204
ENSG00000058673	ZC3H11A	760.28	1473.11	1478	1698.37	1645.32	3362.75
ENSG00000058729	RIOK2	409	386	508.99	561.97	491	1025.99
ENSG00000058799	YIPF1	456	482	736	734	768	754
ENSG00000058804	NDC1	1334	2069	855	1118	984	1623
ENSG00000058866	DGKG	109	96	56	64	86	75
ENSG00000059122	FLYWCH1	1288.03	1297.38	1338	1119.28	1329.29	1041.52
ENSG00000059145	UNKL	710.3	809.07	1012.97	1000.72	971.46	984.46
ENSG00000059377	TBXAS1	17	21	26	27	32	14
ENSG00000059378	PARP12	483	481	784	889	914	967
ENSG00000059573	ALDH18A1	3573	3375	3986	3985	4365	3840
ENSG00000059588	TARBP1	151	236	184	238	236	379
ENSG00000059691	GATB	783	683	922	948	1002.43	681.93
ENSG00000059728	MXD1	65.26	123.48	293.19	356.64	325.69	527.49
ENSG00000059758	CDK17	528	633	791	941	766	1575
ENSG00000059769	DNAJC25	225	214.37	495	636	621	1122
ENSG00000059804	SLC2A3	569	728	795	933.37	888	1092.22
ENSG00000059915	PSD	23.77	12.41	66.52	63.95	57.06	23.86
ENSG00000060069	CTDP1	1503	1382	2325	2142	2498	2068
ENSG00000060138	YBX3	3356	3358	2703	2832.96	2971.99	3444
ENSG00000060140	STYK1	48	27	94	125	102	131
ENSG00000060237	WNK1	2553.38	4919.65	2752.09	3659.08	3988.01	6742.42
ENSG00000060303	RPS17P5	0	0	0	0	0	0
ENSG00000060339	CCAR1	486.22	729.24	746.83	838	635.26	1668
ENSG00000060491	OGFR	4081	3884	4099	3297	3202	2383
ENSG00000060558	GNA15	11	7	29	32	35	30
ENSG00000060566	CREB3L3	0	0	0	0	0	0
ENSG00000060642	PIGV	298	280	358	390	390	351
ENSG00000060656	PTPRU	46	47	68	66	86	57
ENSG00000060688	SNRNP40	2417	2529	4897.18	4587	4694.13	3264
ENSG00000060709	RIMBP2	18	9	24	19	16	16
ENSG00000060718	COL11A1	3	1	0	4	2	1
ENSG00000060749	QSER1	329	608	376	409	330	945
ENSG00000060762	MPC1	700	715	748	867	731	860
ENSG00000060971	ACAA1	1175.92	1024.92	1904.9	1814.64	2234.96	1368.38
ENSG00000060982	BCAT1	1126	1922.98	831	974	820.86	1509
ENSG00000061273	HDAC7	3141.01	3543.19	2379.45	2074.01	2247.23	2062.88
ENSG00000061337	LZTS1	1135	1247	1197	1124	1160	1121
ENSG00000061455	PRDM6	0	0	1	1	8	11
ENSG00000061492	WNT8A	0	0	1	0	0	0
ENSG00000061656	SPAG4	141	153	354	326	406	269
ENSG00000061676	NCKAP1	1482	2101	651	798.04	672.1	1388
ENSG00000061794	MRPS35	893	1213	979	1329	1103	1688
ENSG00000061918	GUCY1B1	76	100	59	65	69	119
ENSG00000061936	SFSWAP	1871	2113	1628	1780.01	1662	2088
ENSG00000061938	TNK2	927.81	927.6	1697	1444.11	1839.36	1379.97
ENSG00000061987	MON2	443	792	671	704	675	1354
ENSG00000062038	CDH3	2	1.98	7	8	10.51	8.02
ENSG00000062096	ARSF	0	0	0	0	0	1
ENSG00000062194	GPBP1	708	1180	981	1123	1091	2520
ENSG00000062282	DGAT2	682	669	1486	1341	1423	1093
ENSG00000062370	ZNF112	25	46	116	111	126	277
ENSG00000062485	CS	6299.88	6985.97	6091.85	6599.37	6494.97	7124.97
ENSG00000062524	LTK	16	25	12	22	26	20
ENSG00000062582	MRPS24	2037.12	1896.41	2515.67	2367.02	2331.46	1293.43
ENSG00000062598	ELMO2	2365	2574.95	2705	3064.99	3320.99	3238.99
ENSG00000062650	WAPL	1175	1755	1430	1735	1409	2789
ENSG00000062716	VMP1	3364.14	4015.27	3122.99	3766	3275.06	4406.33
ENSG00000062725	APPBP2	744.02	1196.01	1392	1899	1651.01	2940
ENSG00000062822	POLD1	2911	2825	8334.85	7039.75	8051.31	5467.36
ENSG00000063015	SEZ6	0	0	1	2	2	1
ENSG00000063046	EIF4B	7661.74	8467.06	7974.81	10055.4	9066.55	11838.6
ENSG00000063127	SLC6A16	1	0	2	0	3	2
ENSG00000063169	BICRA	324	322	738	724.07	812	746
ENSG00000063176	SPHK2	330.06	383.68	665.16	641.34	772.32	578.74
ENSG00000063177	RPL18	11305	9979	12715.2	10436	10995	4941
ENSG00000063180	CA11	53	63	76	56	74	42
ENSG00000063241	ISOC2	863	877	842	728	792	412
ENSG00000063244	U2AF2	10944.7	10030.8	12626.7	11168.4	11904.7	8681.76
ENSG00000063245	EPN1	6605.2	7011	5925.31	5369.7	5913.06	4683.53
ENSG00000063322	MED29	1857	1754.74	2923.43	3095	3213.7	3007.33
ENSG00000063438	AHRR	49.78	40.57	33.96	58.1	50.66	73.84
ENSG00000063515	GSC2	0	0	0	0	0	0
ENSG00000063587	ZNF275	617	970	974	1186	1308	1901
ENSG00000063601	MTMR1	862	1020	744	958	780	1124
ENSG00000063660	GPC1	11092	10834	5424	4806	5465	3996
ENSG00000063761	ADCK1	64	54	135.9	149	160	138
ENSG00000063854	HAGH	1385.12	1406.2	2088.22	1786.24	1939.29	1210.45
ENSG00000063978	RNF4	2204	3174	2413	2742	2880.14	3690
ENSG00000064012	CASP8	467	546.02	363.09	403.88	328.02	437.95
ENSG00000064042	LIMCH1	742	956	718	839	795	1345
ENSG00000064102	INTS13	576	707	592	655	635	1209
ENSG00000064115	TM7SF3	1958.07	1808	1599.66	1729.76	1772.2	1783.51
ENSG00000064195	DLX3	1	1	10	7	12	21
ENSG00000064199	SPA17	323.3	268.46	266.63	332.82	313.82	299.9
ENSG00000064201	TSPAN32	0	0	0	2	0	0
ENSG00000064205	CCN5	10	14	8	2	7	3
ENSG00000064218	DMRT3	0	0	0	0	0	0
ENSG00000064225	ST3GAL6	23	46	51	64	58	91
ENSG00000064270	ATP2C2	0	3.32	10.36	8.9	11.58	13.23
ENSG00000064300	NGFR	188.99	225	544	418	499.83	371.99
ENSG00000064309	CDON	152	213.58	102	114	135	213
ENSG00000064313	TAF2	266	561	503	615	560	1329
ENSG00000064393	HIPK2	1021	1783	997	1285	1261	1926
ENSG00000064419	TNPO3	2855	3335	2176	2521	2372	3240
ENSG00000064489	BORCS8-MEF2B	66.34	85.42	302.91	252.83	306.42	300.39
ENSG00000064490	RFXANK	1252.26	1124.39	1527.95	1396.98	1449.31	789.41
ENSG00000064545	TMEM161A	377	369	641	528	619	427
ENSG00000064547	LPAR2	75	50	60	43	46	46
ENSG00000064601	CTSA	5110.6	5100.51	4461.96	4300.53	4932.3	4455.54
ENSG00000064607	SUGP2	2491.52	3056	3415.05	4194.05	3991	5459.18
ENSG00000064651	SLC12A2	391	542	395	502	446	1019
ENSG00000064652	SNX24	390	493	582	630	533	881
ENSG00000064655	EYA2	1	1	0	1	2	2
ENSG00000064666	CNN2	9930.92	9451.24	12174	11391.1	11870.3	9700.62
ENSG00000064687	ABCA7	167	170	649	587	742	476
ENSG00000064692	SNCAIP	56	104.08	32	54	49	98
ENSG00000064703	DDX20	591	791	1807	2318.6	1938	3143
ENSG00000064726	BTBD1	1978	2112	1760	2257	1934	3194
ENSG00000064763	FAR2	27.45	32	16	30	26	37
ENSG00000064787	BCAS1	0	1	4	3	7	12
ENSG00000064835	POU1F1	0	0	0	1	0	0
ENSG00000064886	CHI3L2	0	2	1	0	3	1
ENSG00000064932	SBNO2	2506.01	2522	7697	7067.99	7924	6109.01
ENSG00000064933	PMS1	108	121	257	243	167.02	453
ENSG00000064961	HMG20B	3537	3362	4661	4021.87	4371.92	3166.94
ENSG00000064989	CALCRL	0	1	0	3.89	1	0
ENSG00000064995	TAF11	559	519	504	640	556	479
ENSG00000064999	ANKS1A	963	1025	1793	1893	1971	2016
ENSG00000065000	AP3D1	5800	6065	7028	7123	7954	7473
ENSG00000065029	ZNF76	838	830	1859	1557	2051	1444
ENSG00000065054	SLC9A3R2	2030	2092	2510	2346	2417	1976
ENSG00000065057	NTHL1	475	382	540	425	433	199
ENSG00000065060	UHRF1BP1	630	995	808	1153.98	1119	1578
ENSG00000065135	GNAI3	2199	2494	2164.03	2730.47	2016.01	3928
ENSG00000065150	IPO5	6685	10701	5378	7039	6412	10299
ENSG00000065154	OAT	1381	1568	820	1052	800	1337
ENSG00000065183	WDR3	1169	1365.17	965	1247	1026	1610
ENSG00000065243	PKN2	480	843	583	648	510	1404
ENSG00000065268	WDR18	1355	1326	1855	1616	1836	1170
ENSG00000065308	TRAM2	5246.99	6914.98	4509	5372	5606	7144
ENSG00000065320	NTN1	11	21	26	28	34	28
ENSG00000065325	GLP2R	6	10	13	16	15	22
ENSG00000065328	MCM10	622	979	1875	2576	2181	4124
ENSG00000065357	DGKA	532.35	579.45	687	688	772.03	816
ENSG00000065361	ERBB3	56	58	58.12	37	63	55
ENSG00000065371	ROPN1	0	0	3.63	1	0	2.45
ENSG00000065413	ANKRD44	126	165	189.11	199	182	323
ENSG00000065427	KARS1	4626	4305.01	4044.02	4583	4589	4105.38
ENSG00000065457	ADAT1	826	1051.73	1060	1284.99	1276.82	1752.07
ENSG00000065485	PDIA5	232	245	218	268.23	256	280
ENSG00000065491	TBC1D22B	500.88	546.78	1348.63	1341.32	1487.48	1414.19
ENSG00000065518	NDUFB4	1730	1492	1385	1505	1374	1134
ENSG00000065526	SPEN	1521	2474	2137	2598	2574	4169
ENSG00000065534	MYLK	6876.36	9987.81	6019.71	7457.22	7433.41	10649.3
ENSG00000065548	ZC3H15	442	436	450	514	504	822
ENSG00000065559	MAP2K4	342	540	374.9	417.01	427.99	742
ENSG00000065600	PACC1	357	441	392	394	380	374
ENSG00000065609	SNAP91	0	0	0	0	0	2
ENSG00000065613	SLK	370	587	468	572	459	1407
ENSG00000065615	CYB5R4	793	661.99	755.29	936.64	820.67	1318.47
ENSG00000065618	COL17A1	109	71	174	187	152	160
ENSG00000065621	GSTO2	89	87	127.57	164	122	146.01
ENSG00000065665	SEC61A2	409.72	425.51	862.33	856	932	978.47
ENSG00000065675	PRKCQ	8	5	7	14	10	14
ENSG00000065717	TLE2	365	391	356	314	389	279
ENSG00000065802	ASB1	3325	3430	4548	4231	4262	3462
ENSG00000065809	FAM107B	692	862	1013	1404	1089	1960
ENSG00000065833	ME1	80	96	77	82	83	119
ENSG00000065882	TBC1D1	1960	2434	1840	2124	2190	3088
ENSG00000065883	CDK13	491	812	432	618.47	500	920
ENSG00000065911	MTHFD2	2145	2750.69	1749.57	2109.19	1870.49	2388.76
ENSG00000065923	SLC9A7	797	1129.95	644	703	640.03	831
ENSG00000065970	FOXJ2	1612	1878	2779	3044	3287	3523
ENSG00000065978	YBX1	24062.6	25720.6	18547.7	20113	20751	24501.9
ENSG00000065989	PDE4A	281	297	222	168	190	189
ENSG00000066027	PPP2R5A	291	473	134	171	151	323
ENSG00000066032	CTNNA2	0	0	0	1	0	0
ENSG00000066044	ELAVL1	2981.02	3549	2489.01	2635.98	2468.4	2865
ENSG00000066056	TIE1	2613.01	2568	2961.82	2591.03	2800.99	2278.03
ENSG00000066084	DIP2B	980	1659	990	1330	1243	2005
ENSG00000066117	SMARCD1	2440	2758	1726	1719	1632	1782
ENSG00000066135	KDM4A	1886.83	2009.4	2652.73	2655.8	2973.15	3023.79
ENSG00000066136	NFYC	799.72	921.56	1567.85	1642.01	1672.63	1906.02
ENSG00000066185	ZMYND12	3	4	17.14	4	13.39	15.23
ENSG00000066230	SLC9A3	612.55	674.96	692.57	752.42	712.69	745.92
ENSG00000066248	NGEF	725	779	662	571	642	541
ENSG00000066279	ASPM	454	725	638	588	511	2073
ENSG00000066294	CD84	0	3.02	5.28	4	4	6.01
ENSG00000066322	ELOVL1	4016	3760	4545	4130	4582	3401
ENSG00000066336	SPI1	0	0	0	1	0	1
ENSG00000066379	ZNRD1	359.95	286.52	406.72	372.98	426.62	208.69
ENSG00000066382	MPPED2	0	0	0	0	1	0
ENSG00000066405	CLDN18	0	1	2	3	7	9
ENSG00000066422	ZBTB11	231.09	401.05	596.42	649.33	620.1	1318.07
ENSG00000066427	ATXN3	99	116	102	111	97	194.03
ENSG00000066455	GOLGA5	479	572	375	485	395	659
ENSG00000066468	FGFR2	1	0	1	0	0	0
ENSG00000066557	LRRC40	263	257	288	334	346	666
ENSG00000066583	ISOC1	674	769	788	903	743	1040
ENSG00000066629	EML1	594	832	529	735	641	914.97
ENSG00000066651	TRMT11	153	148	239	341	292	601
ENSG00000066654	THUMPD1	390	633	680	688	547	1317.47
ENSG00000066697	MSANTD3	2032.51	2390	2651.39	3252.46	2704.11	3572.23
ENSG00000066735	KIF26A	163	144	166	146	182	177
ENSG00000066739	ATG2B	143	365	232	273	281	611
ENSG00000066777	ARFGEF1	279	583	332	349	260	819
ENSG00000066813	ACSM2B	0	0	0	0	1	0
ENSG00000066827	ZFAT	219	228	973	997	1103.99	1126.42
ENSG00000066855	MTFR1	484	537.09	327	382	328.1	559
ENSG00000066923	STAG3	60.8	91.3	62.35	63.06	73.23	113.31
ENSG00000066926	FECH	732	938	703	834	767	993
ENSG00000066933	MYO9A	311	661	360.37	429	394	890
ENSG00000067048	DDX3Y	298	481	216	256	207	494
ENSG00000067057	PFKP	7809	7025.92	10045	9293	9393	6740
ENSG00000067064	IDI1	662.98	697.82	704.76	846.68	655.58	911.93
ENSG00000067066	SP100	1226	1456	1046	1294.03	941	1674.37
ENSG00000067082	KLF6	1244	1774	3975	4574	3941	5719
ENSG00000067113	PLPP1	419.4	477.14	550.46	560.49	532.3	572.67
ENSG00000067141	NEO1	1168	1560	797	948	1137	1484
ENSG00000067167	TRAM1	2330	2172	1091	1457	1172	1852
ENSG00000067177	PHKA1	287	362	132	132	147	177.53
ENSG00000067182	TNFRSF1A	4491	4460	2519	2394	2438	2122
ENSG00000067191	CACNB1	343	379	1136	1101	1427	1191
ENSG00000067208	EVI5	311	600	297	299.01	273	632.15
ENSG00000067221	STOML1	413	413	1321	1024	1165	694.01
ENSG00000067225	PKM	109868	99062	121250	106019	109935	77359
ENSG00000067248	DHX29	400	704	664	740	658	1583
ENSG00000067334	DNTTIP2	573.27	582.05	962	990.99	903.32	2331
ENSG00000067365	METTL22	665	651	1041	1025.4	1353	948
ENSG00000067369	TP53BP1	1664.7	2671.77	2540.11	3493.88	3432.33	4916.18
ENSG00000067445	TRO	234	255	319	293	357	311
ENSG00000067533	RRP15	256	357	420	500	422	708
ENSG00000067560	RHOA	29115.2	28189	25081.2	25457.3	24354	21426
ENSG00000067596	DHX8	3277.93	3608	4688	5138	6394	5912
ENSG00000067601	PMS2P4	196.99	188.84	154.26	157.12	201.95	177.19
ENSG00000067606	PRKCZ	1387.04	1400.63	2084.14	1743.31	2017.61	1431.28
ENSG00000067646	ZFY	78	86	232	321.43	217	633.29
ENSG00000067704	IARS2	1452	2021	760	970	857	1378
ENSG00000067715	SYT1	46	89	60	70	64	96
ENSG00000067798	NAV3	570.98	1184.13	1539.98	1852.15	1634.12	3689.34
ENSG00000067829	IDH3G	2578.5	2615.78	4577.88	3639.81	4051.9	2538.65
ENSG00000067836	ROGDI	730.9	767.24	1072.67	869.46	1055.36	635.28
ENSG00000067840	PDZD4	1374	1283	1028	1004	998	768
ENSG00000067842	ATP2B3	0	0	0	0	0	0
ENSG00000067900	ROCK1	656.81	1036.49	560.46	627.04	535.07	1587.82
ENSG00000067955	CBFB	2249	2926	1291	1546	1163	2133
ENSG00000067992	PDK3	395	456	119	136	122	194
ENSG00000068001	HYAL2	1598	1550	854	682	752	486
ENSG00000068024	HDAC4	343.99	377.11	469.97	468.96	521.94	599.88
ENSG00000068028	RASSF1	1659.8	1509.67	6687.69	5556.79	5889.56	3524
ENSG00000068078	FGFR3	211	216	304	306	352	288
ENSG00000068079	IFI35	769	673	652	600	624	364
ENSG00000068097	HEATR6	1550	1686.67	1714	2065.4	2179	2846
ENSG00000068120	COASY	3247.21	3129.35	4221.76	3701.26	4112.27	3136.46
ENSG00000068137	PLEKHH3	709	634.89	601.84	494.28	550	415.01
ENSG00000068305	MEF2A	293.42	467.37	538.07	642.72	576.25	1080.8
ENSG00000068308	OTUD5	4568	4179	5884	5411	5756	4733
ENSG00000068323	TFE3	5648	5910	10174	9828	10478	9082
ENSG00000068354	TBC1D25	603.78	662.96	718.82	699	836	604.78
ENSG00000068366	ACSL4	2311	2704	1641	1953	1477	3116
ENSG00000068383	INPP5A	560	551.86	396	432	392.86	453.5
ENSG00000068394	GPKOW	1325	1197	2061	2068	2083	1528
ENSG00000068400	GRIPAP1	2071	1985.05	3405.07	3478.72	3590	3552
ENSG00000068438	FTSJ1	2665	2714	2809	2952	2882	2649
ENSG00000068489	PRR11	3203.58	4105.57	1979.14	2353.52	1944.98	2928.93
ENSG00000068615	REEP1	87	132	72	77	62	52
ENSG00000068650	ATP11A	1377	1991	1373	1729	1756	2558
ENSG00000068654	POLR1A	3895	4133	3671	4297.99	4650	4832.45
ENSG00000068697	LAPTM4A	4480	4836	2729	3192	2606	3266
ENSG00000068724	TTC7A	808	914.59	2496.97	2293.04	2807.63	2159.94
ENSG00000068745	IP6K2	1472	1518	2743	2589	2549	2397
ENSG00000068781	STON1-GTF2A1L	0	0	0	0	0	0
ENSG00000068784	SRBD1	233	379	436.05	514	465	1122.09
ENSG00000068796	KIF2A	1021.95	1605.19	1140.79	1219.33	1070.97	2313.84
ENSG00000068831	RASGRP2	261	262	463	400	434	303
ENSG00000068878	PSME4	928	1941.53	1459.67	2014.34	1768.38	3677.74
ENSG00000068885	IFT80	66.6	123.27	77.1	93.87	94.38	241.27
ENSG00000068903	SIRT2	1015	1061	1193	1108	1166.88	803
ENSG00000068912	ERLEC1	538	765	501	640	529	886
ENSG00000068971	PPP2R5B	870	793	1240	1170	1393	1086
ENSG00000068976	PYGM	11.08	25	34	39	31.01	22
ENSG00000068985	PAGE1	7	8	5	5	15	0
ENSG00000069011	PITX1	405	452	234	209	267	206
ENSG00000069018	TRPC7	0	0	0	0	1	3
ENSG00000069020	MAST4	153	274	322	323	398	637
ENSG00000069122	ADGRF5	0	1	0	1	1	1
ENSG00000069188	SDK2	7	8	11	9	14	10
ENSG00000069206	ADAM7	0	0	0	0	0	0
ENSG00000069248	NUP133	654	935	837	948	913	1564
ENSG00000069275	NUCKS1	5809.79	8372	5147.94	6263	4886	8836
ENSG00000069329	VPS35	1935	2808	1718.13	2156.97	1897	3098.46
ENSG00000069345	DNAJA2	2045	2075	2058	2463	1992	2590
ENSG00000069399	BCL3	211	225	3702	3458	3644	2998
ENSG00000069424	KCNAB2	624.6	637	718	695	728.39	587.29
ENSG00000069431	ABCC9	88.61	150.7	236.76	243.43	182.4	434.23
ENSG00000069482	GAL	1	6	0	2	2	3
ENSG00000069493	CLEC2D	17.24	32.91	82.6	82.74	83.02	180.43
ENSG00000069509	FUNDC1	361	299	341	413	322	425
ENSG00000069535	MAOB	10	11	15	9	12	12
ENSG00000069667	RORA	61	63	100	127.18	109	243
ENSG00000069696	DRD4	0	4	12	10	9	10
ENSG00000069702	TGFBR3	108	184	45	56	43	106
ENSG00000069764	PLA2G10	0	0	1	0	0	0
ENSG00000069812	HES2	0	3.02	3.34	2.85	1	1
ENSG00000069849	ATP1B3	2848	2965	1814	2105	2100	2332
ENSG00000069869	NEDD4	489.62	809.48	688.43	727.48	604.98	1602.47
ENSG00000069943	PIGB	49.28	69.77	69.38	73.71	92.41	134.33
ENSG00000069956	MAPK6	504	820	622	698.99	616	1316
ENSG00000069966	GNB5	1815.79	1773.2	2034.33	2058.97	2138.81	1964
ENSG00000069974	RAB27A	396.76	443.73	399.31	469.73	388.29	592.83
ENSG00000069998	HDHD5	1484	1503	2153	1740	2070	1504
ENSG00000070010	UFD1	3970	3567.06	4219.99	4145.99	4574.98	3341
ENSG00000070018	LRP6	603	942	994	1320	1130	1948
ENSG00000070019	GUCY2C	0	0	0	0	0	1
ENSG00000070031	SCT	0	1	6	2	1	1
ENSG00000070047	PHRF1	2659	2617	4283	3999	4120	3462
ENSG00000070061	ELP1	2294	2771	1094	1386	1230.74	1996
ENSG00000070081	NUCB2	540	448	322	338	321	683
ENSG00000070087	PFN2	6439	6470	4231	5215	4716	5105
ENSG00000070159	PTPN3	536	928	577	716	690	1129
ENSG00000070182	SPTB	158.97	120.06	140.31	125.65	139.34	118.46
ENSG00000070190	DAPP1	0	0	2.94	1	0	0
ENSG00000070193	FGF10	0	0	0	0	0	0
ENSG00000070214	SLC44A1	1072.98	1650	748	1003	912.22	1534.06
ENSG00000070269	TMEM260	245	270	485	646	596	1038
ENSG00000070366	SMG6	2587.43	2597.76	3129.99	3316.03	3623.74	3518.44
ENSG00000070367	EXOC5	679	1097	595	656	544	1412
ENSG00000070371	CLTCL1	819.91	827.99	1477.96	1433.97	1993.91	1556.96
ENSG00000070388	FGF22	11	4	9	6	8.97	8.01
ENSG00000070404	FSTL3	706	674	16993	15497	16300	9890
ENSG00000070413	DGCR2	2425	2563	2074	1969	2125	1689
ENSG00000070423	RNF126	1200	1222	2225	2208	2264	2089
ENSG00000070444	MNT	593	707.97	963.37	970	1109.7	988.42
ENSG00000070476	ZXDC	907.93	1279.09	2749.12	2815	2933.21	3209.66
ENSG00000070495	JMJD6	1140	1207	4583	4740	5152.02	4315.63
ENSG00000070501	POLB	609	547	722	919	765	954
ENSG00000070526	ST6GALNAC1	0	0	0	0	1	0
ENSG00000070540	WIPI1	713.15	720.57	722.89	857.35	849.98	942.48
ENSG00000070601	FRMPD1	4	4	5.1	2	7	8.29
ENSG00000070610	GBA2	1119.05	1190.18	1959	1828.81	2096.1	1716.49
ENSG00000070614	NDST1	4476	4866	3502	3376	4033	3672
ENSG00000070669	ASNS	969.19	886.58	708.9	901.76	922.12	830.77
ENSG00000070718	AP3M2	561	824	1384	1851	1763	2461
ENSG00000070729	CNGB1	0	0	0	1	0	0
ENSG00000070731	ST6GALNAC2	21	15.54	32.71	25	30.21	28
ENSG00000070748	CHAT	5	6	2	1	1	1
ENSG00000070756	PABPC1	10105	12528	8838	10056	9331.99	12852.9
ENSG00000070759	TESK2	83	105.18	246	266	362.14	306
ENSG00000070761	CFAP20	1162	1183	3002	3184	2914	2497
ENSG00000070770	CSNK2A2	1377.57	1905.69	1546.58	1704.29	1684.56	2006.4
ENSG00000070778	PTPN21	410	481	627	830.95	754	1097
ENSG00000070785	EIF2B3	1130	1029	1420	1418	1489	1072
ENSG00000070808	CAMK2A	12	15	13	35	21	28
ENSG00000070814	TCOF1	4904	4805.98	5436.75	5412.85	6382.56	6588.13
ENSG00000070831	CDC42	5722	6623.85	3119.57	3973.34	3184.16	4737.38
ENSG00000070882	OSBPL3	357	584	503	586	536	879
ENSG00000070886	EPHA8	0	0	0	0	1	3
ENSG00000070915	SLC12A3	0	0	1	2	0	3
ENSG00000070950	RAD18	691	1147	830	1006	798	1983
ENSG00000070961	ATP2B1	720	1093	548	589	533	1282
ENSG00000070985	TRPM5	0	0	0	0	0	0
ENSG00000071051	NCK2	966	1052.85	794.77	936.98	932	963
ENSG00000071054	MAP4K4	7942	9129	5472	6579	5857	8131
ENSG00000071073	MGAT4A	44	64.71	30.45	29.91	35.01	75.08
ENSG00000071082	RPL31	11274	8667	5797	7034	6896	4213
ENSG00000071127	WDR1	62237	57697	72512	68704	70142	57507
ENSG00000071189	SNX13	146	317	137	156	164	369
ENSG00000071203	MS4A12	0	0	0	0	0	0
ENSG00000071205	ARHGAP10	590	597	1553	1891	1827	2144
ENSG00000071242	RPS6KA2	387	548	588	606	745	826
ENSG00000071243	ING3	226	245	750	879	807	1408
ENSG00000071246	VASH1	517.02	572.04	275.38	272.5	273.78	250.18
ENSG00000071282	LMCD1	250	229	868	868	869	671
ENSG00000071462	BUD23	3426	3047.79	4243.5	3825.46	3725.33	2728.73
ENSG00000071537	SEL1L	939	1486	195	264	272	588
ENSG00000071539	TRIP13	3862	5147	3574	4038.96	3666	4956
ENSG00000071553	ATP6AP1	4800	4751	4897	4630	5433	4283
ENSG00000071564	TCF3	2978	3099	1906	1962	1997	1973
ENSG00000071575	TRIB2	23	30	54	61	74	78
ENSG00000071626	DAZAP1	4267	3903	3949	4081	4098	3567
ENSG00000071655	MBD3	5885.2	5627.88	4632.22	3906.49	4326.78	3084.7
ENSG00000071677	PRLH	0	0	0	0	0	0
ENSG00000071794	HLTF	702.33	1182.98	507.31	595.3	530.26	1280.92
ENSG00000071859	FAM50A	8967	7898	11833	10637	11416	7672
ENSG00000071889	FAM3A	2590	2413	2968	2466	2907	2034
ENSG00000071894	CPSF1	3052	3120	3994	3608	4135	3039
ENSG00000071909	MYO3B	0	0	2	0	0	1
ENSG00000071967	CYBRD1	577	828.09	435	495	406	632
ENSG00000071991	CDH19	0	0	0	0	0	0
ENSG00000071994	PDCD2	2232	2121	2043	2389	2270	2298
ENSG00000072041	SLC6A15	0	0	0	0	0	0
ENSG00000072042	RDH11	2787	2877.98	2941.56	3406.59	3009.33	4118.12
ENSG00000072062	PRKACA	3886	3973	2577	2657	2550	2519
ENSG00000072071	ADGRL1	650.94	693.22	573.79	447.89	622.03	568.83
ENSG00000072080	SPP2	1.57	0	0	0	0	1.51
ENSG00000072110	ACTN1	50910.8	47699.6	33550	36257.1	32956.3	33134.4
ENSG00000072121	ZFYVE26	1724	2211	1803	2059.47	2303.21	2522
ENSG00000072133	RPS6KA6	106.08	205.65	89	77	90	248
ENSG00000072134	EPN2	1255.08	1606.9	1300.14	1624.98	1701.41	2187.89
ENSG00000072135	PTPN18	960	979	1237	1190	1308	1173
ENSG00000072163	LIMS2	1033	1084	1194	1050	1141	991
ENSG00000072182	ASIC4	1	2	3	0	0	3
ENSG00000072195	SPEG	976.02	1084	2111	1901.31	2223	1728
ENSG00000072201	LNX1	0	0	2.64	0	1.54	2.53
ENSG00000072210	ALDH3A2	550.18	666.72	373	448.77	418.67	589
ENSG00000072274	TFRC	1269	1834	887	1125	956	1715
ENSG00000072310	SREBF1	685.84	674	1429.83	1262	1581.26	1219
ENSG00000072315	TRPC5	0	0	1	8	1	0
ENSG00000072364	AFF4	1421	2776	2334	2746	2483	5622
ENSG00000072401	UBE2D1	261	264	265	297	250	426
ENSG00000072415	MPP5	536	828	787	1070.99	868.99	1735.97
ENSG00000072422	RHOBTB1	80	133	104	114	102	148
ENSG00000072501	SMC1A	5194	6508.98	5324	6670	6229.94	9797
ENSG00000072506	HSD17B10	3153	2771	3892	3234	3276	1915
ENSG00000072518	MARK2	1478	1479	2309	2179	2415	2558
ENSG00000072571	HMMR	1298	1192	1403	1396	1262	3422
ENSG00000072609	CHFR	369.56	364.34	634.17	599.08	689.36	563.67
ENSG00000072657	TRHDE	55.62	90.24	43.28	45.86	16.94	91.55
ENSG00000072682	P4HA2	4573.09	4407.78	3597.49	3605.79	3613.82	2974.04
ENSG00000072694	FCGR2B	0	1	0	1	0	1
ENSG00000072736	NFATC3	288.61	422.19	539.62	710.45	733.19	1256.8
ENSG00000072756	TRNT1	340.09	345.19	499.12	595.82	524.93	987.07
ENSG00000072778	ACADVL	8079	7436	10421	9187	9773	6733
ENSG00000072786	STK10	3359.03	3457.75	7101.88	7197.99	7248.87	6405
ENSG00000072803	FBXW11	1776	2470	1288	1652	1448	2277
ENSG00000072818	ACAP1	88.81	76.14	339.46	312.39	262.85	202.13
ENSG00000072832	CRMP1	313.06	362.16	285.74	323.69	336.43	328.31
ENSG00000072840	EVC	2451.94	3266.84	3606.2	4174.31	4635.57	5112.25
ENSG00000072849	DERL2	1503	1402.11	1363.88	1811.11	1765.19	1930.19
ENSG00000072858	SIDT1	0	0	0	0	0	2
ENSG00000072864	NDE1	2620.21	2686.07	2466.53	2539.38	2807.17	2595.8
ENSG00000072952	IRAG1	0	0	0	0	3	4
ENSG00000072954	TMEM38A	128	126	117	143	137	98
ENSG00000072958	AP1M1	3191.01	3281	4590.62	4063	4181	3355.02
ENSG00000073008	PVR	2748.36	2679.01	5020.31	5028.3	4843.85	4094.3
ENSG00000073050	XRCC1	1430.2	1358.72	3737.4	3499.76	3927.38	3386.21
ENSG00000073060	SCARB1	1827	1771	976.33	933	1055	936
ENSG00000073067	CYP2W1	1	0	0	0	0	1
ENSG00000073111	MCM2	13408.9	12254.6	45299.3	39603.1	42965.1	29160.6
ENSG00000073146	MOV10L1	3	2	3	3	4	2
ENSG00000073150	PANX2	279	345	135	129	113	109
ENSG00000073169	SELENOO	1042.93	1039.02	3211.79	2617.78	3340.77	2096.89
ENSG00000073282	TP63	0	0	10	9	9	10
ENSG00000073331	ALPK1	85	130.06	154	155	173	216
ENSG00000073350	LLGL2	238	225.02	313	290	371	268
ENSG00000073417	PDE8A	370	600	588	725	744	1275
ENSG00000073464	CLCN4	392	467	594	698	683	943
ENSG00000073536	NLE1	1644	1530	3405.77	2899.94	3651.94	2364.84
ENSG00000073578	SDHA	12118	10995.1	14184.8	12884.5	12961.9	10043.6
ENSG00000073584	SMARCE1	2377.39	2951.63	2035.8	2572.43	2195.98	3618.06
ENSG00000073598	FNDC8	0	0	5.23	1.06	1.06	3.16
ENSG00000073605	GSDMB	238.49	308.06	292.17	268.16	355.46	308.42
ENSG00000073614	KDM5A	1465.87	2065.31	2359.21	2845.91	2989.39	4152.41
ENSG00000073670	ADAM11	279	260	220	202	259	203
ENSG00000073711	PPP2R3A	240	430	350	352	340	766
ENSG00000073712	FERMT2	2291	3461	2038.89	2564	1928.14	3815.4
ENSG00000073734	ABCB11	5	6.09	2.05	3	2.47	4.04
ENSG00000073737	DHRS9	1	3	1	3	0	0
ENSG00000073754	CD5L	0	0	1	0	0	0
ENSG00000073756	PTGS2	4	1	40	40	30	75
ENSG00000073792	IGF2BP2	2216.03	2832	2795.03	3599.84	3808	5076
ENSG00000073803	MAP3K13	126.01	201.98	209.85	218.89	167.8	356.03
ENSG00000073849	ST6GAL1	7	13	3	3	2	4
ENSG00000073861	TBX21	0	0	2	1	2	2
ENSG00000073905	VDAC1P1	0	3.02	0	0.91	0	0
ENSG00000073910	FRY	82	155	90	99	83	166.19
ENSG00000073921	PICALM	6112	9731	8345	10402	8157	15234
ENSG00000073969	NSF	2246.16	3120.14	1551.51	1938	1928.09	3092.21
ENSG00000074047	GLI2	977	1292	791	833	913	1030
ENSG00000074054	CLASP1	1245.48	2080.68	1511	1952.68	1758.6	3185.43
ENSG00000074071	MRPS34	3060.5	2731	3336.91	3009.97	3157.86	2096.85
ENSG00000074181	NOTCH3	673	706	241	198	235	206
ENSG00000074201	CLNS1A	3007	3187	2546	3006	2822	3203
ENSG00000074211	PPP2R2C	9	21	23	14	10	7
ENSG00000074219	TEAD2	441	471	267.32	249	251	229
ENSG00000074266	EED	1239	1200	2053.98	2257	2281.88	2251
ENSG00000074276	CDHR2	4	1	1	1	4	3
ENSG00000074317	SNCB	3	9	5	8	10	9
ENSG00000074319	TSG101	792	873	1181	1378	1197	1614
ENSG00000074356	NCBP3	1529	1909.74	1860.9	2305.91	2221	3136
ENSG00000074370	ATP2A3	348	331	319	296	347	281
ENSG00000074410	CA12	4	13	2	1	4	3
ENSG00000074416	MGLL	1354	1459	1001.01	1100.02	1112.1	1113.9
ENSG00000074527	NTN4	482	626	199	223	204	309
ENSG00000074582	BCS1L	785	746	971	932.03	1004.27	640.37
ENSG00000074590	NUAK1	1346	1465	3855	4425	4306	4815
ENSG00000074603	DPP8	411	757	783	923	815.66	1626
ENSG00000074621	SLC24A1	144	218	133.31	164.62	177.87	286.85
ENSG00000074657	ZNF532	466	878.99	627	864.97	778	1372.95
ENSG00000074660	SCARF1	63	64	84.02	105	100.14	104.76
ENSG00000074695	LMAN1	935	1540	730	786	677	1674
ENSG00000074696	HACD3	4026.01	4467	3412.01	4021	3463.72	4596.99
ENSG00000074706	IPCEF1	0	0	8.55	1.16	7.4	13.71
ENSG00000074755	ZZEF1	1766.07	2336.15	2968.91	3647.61	4357.21	4747.8
ENSG00000074771	NOX3	0	0	0	0	0	0
ENSG00000074800	ENO1	89628	77723.9	74269	71986	75342.9	55634
ENSG00000074803	SLC12A1	1	0	0	1	0	0
ENSG00000074842	MYDGF	3513	3173	3858	3516	3438	1892
ENSG00000074855	ANO8	178	200	307	298	418	348
ENSG00000074935	TUBE1	190	232	268	345	291	534
ENSG00000074964	ARHGEF10L	534	581	731	607	701	585
ENSG00000074966	TXK	3	4	6	9	8	18
ENSG00000075035	WSCD2	0	0	2	0	0	2
ENSG00000075043	KCNQ2	0	0	0	2	0	2
ENSG00000075073	TACR2	4	4	0	2	1	1
ENSG00000075089	ACTR6	439.16	298.63	276.81	393	337	498
ENSG00000075131	TIPIN	283	349.84	846	947.17	765.63	1311.34
ENSG00000075142	SRI	2088	2165	2104.01	2014	1828	1376
ENSG00000075151	EIF4G3	1370	2250	1324	1611	1430	2516
ENSG00000075188	NUP37	828	797	825	1065	916	1091
ENSG00000075213	SEMA3A	32	55	22	29	11	33
ENSG00000075218	GTSE1	2885.08	3091.33	4173.04	4662.86	4958.59	5975.88
ENSG00000075223	SEMA3C	1105	1564	1504	1793	1392	3298
ENSG00000075234	TTC38	639	551	1797	1614	1948	1315
ENSG00000075239	ACAT1	1664	1905.03	1145.12	1470.6	1321	1774
ENSG00000075240	GRAMD4	377	453	270	277	259	274
ENSG00000075275	CELSR1	99	96	33	46	54	36
ENSG00000075290	WNT8B	0	0	0	1	0	1
ENSG00000075292	ZNF638	276	565	640	698	719	2054
ENSG00000075303	SLC25A40	271	398.92	581	648	612	1112.65
ENSG00000075336	TIMM21	350	515	172	211	216	312
ENSG00000075340	ADD2	1224	1242	736	832	845.02	873
ENSG00000075388	FGF4	0	0	1	0	1	0
ENSG00000075391	RASAL2	467	798.21	840	1183.93	1087.01	1818
ENSG00000075399	VPS9D1	622.91	689.81	1655.81	1443.9	1583	1259.79
ENSG00000075407	ZNF37A	103.07	154.05	109.73	131.95	114.34	321.74
ENSG00000075413	MARK3	871	1025	1100	1218	1147	1562
ENSG00000075415	SLC25A3	12624	11767	11253.3	11389	11659.4	9060.33
ENSG00000075420	FNDC3B	327	600.22	489.01	595.72	500.31	932.05
ENSG00000075426	FOSL2	7536	8129	16931	18117	17158	16875
ENSG00000075429	CACNG5	1	0	4	1.51	3	2
ENSG00000075461	CACNG4	1695	1731	463	446	458	395
ENSG00000075539	FRYL	376	816	493	580	578	1490
ENSG00000075568	TMEM131	1311	1768	1143	1374	1285	2509
ENSG00000075618	FSCN1	7112	6941	6381.02	5995	6178.5	5213
ENSG00000075624	ACTB	151672	164069	95045.3	89452.3	89899.1	89505.1
ENSG00000075643	MOCOS	161.55	152.91	256.53	274.43	324.42	330.91
ENSG00000075651	PLD1	32	55	75	81	85	116
ENSG00000075673	ATP12A	0	0	0	0	0	0
ENSG00000075702	WDR62	2064	2195.08	7167.79	6780.15	8408.05	6882
ENSG00000075711	DLG1	1921.99	2739	710	858.05	709.05	1387
ENSG00000075785	RAB7A	6592	7238	4161	4622	4309.8	5094.19
ENSG00000075790	BCAP29	538.97	400.47	396.61	502.67	402.56	634.56
ENSG00000075826	SEC31B	53.23	76.24	207.86	257.38	299.4	293.02
ENSG00000075856	SART3	3118.99	3207.98	4904.99	5819.97	5929.97	6498.98
ENSG00000075884	ARHGAP15	1	1	0	0	0	0
ENSG00000075886	TUBA3D	0	4	3	1	5	1
ENSG00000075891	PAX2	1	0	0	1	5	1
ENSG00000075914	EXOSC7	1033.69	902.51	1346.66	1364	1381.53	912
ENSG00000075945	KIFAP3	305	408	231	251	223	338
ENSG00000075975	MKRN2	1289	1504.34	1803.01	2182.04	1986.08	2278.04
ENSG00000076003	MCM6	1958	2781	3746	4983	4521	6580
ENSG00000076043	REXO2	1674	1515.92	1311.96	1507.85	1347.94	1275.42
ENSG00000076053	RBM7	405.28	490.59	591.18	659.43	527.45	1036.51
ENSG00000076067	RBMS2	1057.94	1411.38	1127.7	1289.07	1350.44	1602.95
ENSG00000076108	BAZ2A	3347.06	4021.99	3923.31	4671.83	4830.26	5583.6
ENSG00000076201	PTPN23	2540.78	2586.93	4304.11	3978.85	4624.99	3738.92
ENSG00000076242	MLH1	1634	1810	2880	3577.39	3305.11	4069.41
ENSG00000076248	UNG	3395	3294	7148	7559	7757	6999
ENSG00000076258	FMO4	20	24	28	29	39	53
ENSG00000076321	KLHL20	634	893	1114	1336	1111	1931
ENSG00000076344	RGS11	0	1	1	0	2	0.91
ENSG00000076351	SLC46A1	258.94	325.05	307.59	318.79	293.87	248.54
ENSG00000076356	PLXNA2	925	937	636.17	773	790	842
ENSG00000076382	SPAG5	5787	6837.67	6556.98	7804.46	7614.16	9480.89
ENSG00000076513	ANKRD13A	7391.11	9034.81	7163.01	8577.2	7977.08	11481.5
ENSG00000076554	TPD52	468.64	486	290	393.73	338.4	532.3
ENSG00000076555	ACACB	662	729	1599	1602	2115	1944.96
ENSG00000076604	TRAF4	1667.06	1615.76	8726.37	7089.49	7817.88	4696.93
ENSG00000076641	PAG1	17	29	48	80	88	159.44
ENSG00000076650	GPATCH1	289	367	702	890	905	1156
ENSG00000076662	ICAM3	0	0	6.06	39.48	15.46	7.94
ENSG00000076685	NT5C2	1067.34	1215.11	2063.27	2527.41	2262.87	3168.55
ENSG00000076706	MCAM	866	892	949.64	846.59	914.84	830.02
ENSG00000076716	GPC4	0	0	0	0	1	2
ENSG00000076770	MBNL3	0	2	0	0	2	2
ENSG00000076826	CAMSAP3	4	3	14	14	22	13
ENSG00000076864	RAP1GAP	31	33	123	66	114	52
ENSG00000076924	XAB2	1622	1477	5427	4408	4593	3045
ENSG00000076928	ARHGEF1	2468	2314	3065	2623	2697	1882
ENSG00000076944	STXBP2	612	589.8	1220	1065.18	1155.86	812.17
ENSG00000076984	MAP2K7	1124	1119.02	2128.1	2056	2202.28	1866.49
ENSG00000077009	NMRK2	0	0	0	0	1	0
ENSG00000077044	DGKD	1187	1302	2474	2454	2696	2610
ENSG00000077063	CTTNBP2	3	4	6	4	2	4
ENSG00000077080	ACTL6B	0	0	2	2	0	1
ENSG00000077092	RARB	67	183	105	145	96	237
ENSG00000077097	TOP2B	1287	1943	687	776	657	1617
ENSG00000077147	TM9SF3	2486	3374	2081	2279	1946	4014
ENSG00000077150	NFKB2	2474	2373	21317	18951	18229	13101
ENSG00000077152	UBE2T	1333	1441	1636	1851	1500	1595
ENSG00000077157	PPP1R12B	194.01	371.99	477.48	733.39	711.44	1199.51
ENSG00000077232	DNAJC10	477.25	725.95	460.57	545.22	521.07	1170.38
ENSG00000077235	GTF3C1	5969	6126	6842	7135	8225	7380
ENSG00000077238	IL4R	1063.13	1040.56	2742.71	2463	2670.54	2188.32
ENSG00000077254	USP33	751.99	1095.49	1043.02	1360	1084.9	2273.42
ENSG00000077264	PAK3	26	44.04	27	24	17	46.27
ENSG00000077274	CAPN6	0	0	0	0	1	1
ENSG00000077279	DCX	0	0	2	0	0	0
ENSG00000077312	SNRPA	2572	2542	3764	3671	3855	3404
ENSG00000077327	SPAG6	110	111	168	196	169	163
ENSG00000077348	EXOSC5	632	609	953	854	805	437
ENSG00000077380	DYNC1I2	1052	1555	1103	1436	1115	2114
ENSG00000077420	APBB1IP	0	0	0	0	0	0
ENSG00000077454	LRCH4	1266.97	1389.5	2887.71	2605.98	2994.06	2326.59
ENSG00000077458	FAM76B	196	200	467	457	427	1005
ENSG00000077463	SIRT6	466	437	1867	1593	1735	1240
ENSG00000077498	TYR	0	0	0	0	0	0
ENSG00000077514	POLD3	1893	2430	4590	5653	5291	7724
ENSG00000077522	ACTN2	84	125	1274.04	1364	1719	2085
ENSG00000077549	CAPZB	9630	8698	7499	7612	7109	5978
ENSG00000077585	GPR137B	131	144	81	86	78	118
ENSG00000077616	NAALAD2	1	1	3	12	13	27
ENSG00000077684	JADE1	554.95	721.94	1204.91	1390.87	1230	1988.85
ENSG00000077713	SLC25A43	422.58	574.21	311.87	445.78	320.87	533.12
ENSG00000077721	UBE2A	2335	2660.11	2388.33	2885	2426.71	3196
ENSG00000077782	FGFR1	6812	7109	6797.01	6835	7831.98	7565
ENSG00000077800	FKBP6	0	0	0	0	2.52	0
ENSG00000077935	SMC1B	0	0	1	0	1	0
ENSG00000077942	FBLN1	143	170	233	179	186	171
ENSG00000077943	ITGA8	0	1	1	1	1	1
ENSG00000077984	CST7	0	0	1	0	0	1
ENSG00000078018	MAP2	2	6	5	2	8	15
ENSG00000078043	PIAS2	230	330.4	236	270	307	553.86
ENSG00000078053	AMPH	0	0	0	0	0	1
ENSG00000078061	ARAF	2635	2864	3702	3302	3586	2848
ENSG00000078070	MCCC1	234	237	398	522	587	807
ENSG00000078081	LAMP3	1	4	23.9	13	11	7.02
ENSG00000078098	FAP	2	0	0	0	0	1
ENSG00000078114	NEBL	0	1	0	1	0	1
ENSG00000078124	ACER3	742.67	1195.97	1163	1386.15	1274.52	2553.57
ENSG00000078140	UBE2K	2065	2455	1317	1608	1284	2061
ENSG00000078142	PIK3C3	328	451.24	813	973.96	861.28	1776.07
ENSG00000078177	N4BP2	63.99	127	227	226	214.08	616
ENSG00000078237	TIGAR	398.66	443.73	519.92	644.23	622.28	869.49
ENSG00000078246	TULP3	1195	1476	1663	1988	2051	2407
ENSG00000078269	SYNJ2	3919.99	4938.34	4794.02	5456.99	4873	6105
ENSG00000078295	ADCY2	3	1	1	3	3.01	2
ENSG00000078304	PPP2R5C	952	1358.98	758.98	879.98	708.01	1312.04
ENSG00000078319	PMS2P1	646.54	621.9	717.46	736.47	709.59	577.21
ENSG00000078328	RBFOX1	239	197	481	559	443	450
ENSG00000078369	GNB1	14236	15482	11112	12404.2	12255	13681
ENSG00000078399	HOXA9	0	0	1	1	0	3
ENSG00000078401	EDN1	254	315	345	371	276	449
ENSG00000078403	MLLT10	229	378	250	274	233	558.02
ENSG00000078487	ZCWPW1	122.2	106.15	115.64	154.63	159.89	198.57
ENSG00000078549	ADCYAP1R1	0	1	8	0	6	1
ENSG00000078579	FGF20	4	2	1	0	2	5
ENSG00000078589	P2RY10	0	1	0	0	0	2
ENSG00000078596	ITM2A	0	0	0	4	0	1
ENSG00000078618	NRDC	2586.89	3588.79	1834.95	2494.81	2283.87	3462.26
ENSG00000078668	VDAC3	4610	4175	3146	3968	3781	3483
ENSG00000078674	PCM1	615	1270	519	535	440	1397
ENSG00000078687	TNRC6C	290.28	448.76	643.19	727.94	765.8	1112.37
ENSG00000078699	CBFA2T2	699.89	853.79	1153.46	1379	1548.99	1787.97
ENSG00000078725	BRINP1	0	0	3	0	0	2
ENSG00000078747	ITCH	1231.16	1711.19	1775.71	2077.09	1799.58	3388.58
ENSG00000078795	PKD2L2	1	1	6.87	2.07	5.96	3.08
ENSG00000078804	TP53INP2	1185	1352	1781	1893	1885	2114
ENSG00000078808	SDF4	5159	4962	3644	3152	3418	2554
ENSG00000078814	MYH7B	4.06	5.99	12	15	18	24
ENSG00000078898	BPIFB2	0	0	0	0	0	0
ENSG00000078900	TP73	163.65	189.16	544.15	502.94	598.88	509.82
ENSG00000078902	TOLLIP	1863	1827	2487	2219	2417	1813
ENSG00000078967	UBE2D4	166.13	205	165.4	146.12	163.09	207
ENSG00000079101	CLUL1	2	4	4	2	2.03	2
ENSG00000079102	RUNX1T1	0	2	3	6	3	6
ENSG00000079112	CDH17	0	3	0	0	2	1
ENSG00000079134	THOC1	419	608	1056	1128	930	2362
ENSG00000079150	FKBP7	56	79	53	61	74	113
ENSG00000079156	OSBPL6	258	370	224	274	255	488
ENSG00000079215	SLC1A3	6	5	13	18	18	30
ENSG00000079246	XRCC5	7750	10255	7778	10116	8674	12874
ENSG00000079257	LXN	137	136	82	100	108	145
ENSG00000079263	SP140	73.08	59.51	64.76	90.26	101.31	89.76
ENSG00000079277	MKNK1	551.08	607	640	639.02	728	770
ENSG00000079308	TNS1	3995	4702	4028	4870	5161	5838
ENSG00000079313	REXO1	1309.61	1371.04	2785.17	2646.09	2808.55	2365.08
ENSG00000079332	SAR1A	2435.68	2877.25	2389.74	2796.02	2313.09	2575.09
ENSG00000079335	CDC14A	70	145	514	654	572	1093
ENSG00000079337	RAPGEF3	482.95	466.84	483	392	471.89	356
ENSG00000079385	CEACAM1	2	1.86	3	3.01	3	3
ENSG00000079387	SENP1	669	1218.95	1448.3	1799.31	1641.87	3169.15
ENSG00000079393	DUSP13	0	0	0	0	1	0
ENSG00000079432	CIC	2107	2519	2519	2442	2839	2536
ENSG00000079435	LIPE	249	264	729	672	860	696
ENSG00000079459	FDFT1	2320	2118	2745	2839.08	2908.59	2111.91
ENSG00000079462	PAFAH1B3	1717.5	1587.55	2004.59	1684.35	1773.61	1009.87
ENSG00000079482	OPHN1	520.87	692.51	699.8	904.46	837.61	1218
ENSG00000079557	AFM	1	0	0	0	0	1
ENSG00000079616	KIF22	4472	4177	9035	7750	8272	5398.94
ENSG00000079689	SCGN	0	0	0	0	0	0
ENSG00000079691	CARMIL1	119	195	115	138	116	212
ENSG00000079739	PGM1	2346	2116	1541	1630	1617	1360
ENSG00000079785	DDX1	884	1273	1425	1740	1551	2853
ENSG00000079805	DNM2	6079.21	5840.85	10672.9	9301.37	10258.6	7550.79
ENSG00000079819	EPB41L2	3026	4115	3150	3939	3228	6120
ENSG00000079841	RIMS1	0	0	2	0	0	0
ENSG00000079931	MOXD1	403	581	255	383	341	549
ENSG00000079950	STX7	743	1095.25	653.01	791	654	1081.25
ENSG00000079974	RABL2B	645.46	703.23	904.48	787.28	869.9	883.92
ENSG00000079999	KEAP1	2101	2017	2659	2443	2470	1905
ENSG00000080007	DDX43	0	0	2	0	0	0
ENSG00000080031	PTPRH	209	159	623	643	771	600
ENSG00000080166	DCT	0	1	0	1	1	4
ENSG00000080189	SLC35C2	1101	1110	1298	1208	1536	1232
ENSG00000080200	CRYBG3	90.58	197.82	147.81	170.06	152.71	445.32
ENSG00000080224	EPHA6	0	0	0	0	0	0
ENSG00000080293	SCTR	0	0	0	0	0	0
ENSG00000080298	RFX3	21	43	45	60	70	100
ENSG00000080345	RIF1	310.99	565.16	775	746	629.37	2321
ENSG00000080371	RAB21	762.56	994	1069.4	1250.25	1114.33	1743.36
ENSG00000080493	SLC4A4	39	90	78	95	93	136
ENSG00000080503	SMARCA2	526	729.85	430	575	489	903
ENSG00000080511	RDH8	0	0	0	3	1	2
ENSG00000080546	SESN1	104	181	100.71	130	127	215
ENSG00000080561	MID2	188	294	170	244	237	370
ENSG00000080572	DNAAF6	0	0	1	2	2	4
ENSG00000080573	COL5A3	7	2	177	163	190	154
ENSG00000080603	SRCAP	2662.77	3300.31	4901.72	5424.29	6918.35	7197.17
ENSG00000080608	PUM3	235	435	420	466	410	1032
ENSG00000080618	CPB2	1	1	3	1	1	2
ENSG00000080644	CHRNA3	5	16	22	25	36	35
ENSG00000080709	KCNN2	2	6	22	27.01	10	29
ENSG00000080802	CNOT4	329	371.05	1076.72	1345.02	1239.45	1896.23
ENSG00000080815	PSEN1	1013	1158	982	1088	1203	1290
ENSG00000080819	CPOX	958	1087	749	822	673	1028
ENSG00000080822	CLDND1	430	671	541	673	611	1018.54
ENSG00000080823	MOK	579	619.01	798.17	859	846.85	1004.87
ENSG00000080824	HSP90AA1	7528.98	12058.9	4453.97	5836.08	4864.13	10053
ENSG00000080839	RBL1	526.87	854.81	1576.5	1893.35	1716.23	4066.9
ENSG00000080845	DLGAP4	4053	4434	4287	4088	4440.99	4549.82
ENSG00000080854	IGSF9B	110	160	205	265	321	364
ENSG00000080910	CFHR2	0	1	0	1	0	0
ENSG00000080947	CROCCP3	39.55	79.78	74.8	80.92	125.89	140.61
ENSG00000080986	NDC80	1477	1754.48	2009	2363	1826	3885
ENSG00000081014	AP4E1	248	424	594.09	619.07	559	1180
ENSG00000081019	RSBN1	172	267	587	620	680	1223
ENSG00000081026	MAGI3	357.28	413.94	376.2	450.2	458.15	857.97
ENSG00000081041	CXCL2	59.04	93	4157.07	4517.18	3779.83	4128.52
ENSG00000081051	AFP	19	20	28	18	18	16
ENSG00000081052	COL4A4	6	4	5	5	6	13
ENSG00000081059	TCF7	169	182	355	413	409	476
ENSG00000081087	OSTM1	537	499	346	457	345	732
ENSG00000081138	CDH7	0	3	0	2	2	1
ENSG00000081148	IMPG2	0	5	3	2	2	5
ENSG00000081154	PCNP	2359	2330	1752	2057	1602	2789
ENSG00000081177	EXD2	442	465.91	377	525	542	624
ENSG00000081181	ARG2	201.13	175.88	593.07	710.46	685.05	628.4
ENSG00000081189	MEF2C	5	3	7	11	15	33
ENSG00000081237	PTPRC	25	28	18	15	7	21
ENSG00000081248	CACNA1S	0	1	2	0	6	2
ENSG00000081277	PKP1	0	2	0	3	1	1
ENSG00000081307	UBA5	361.73	474	489.64	646.76	607.48	1030.4
ENSG00000081320	STK17B	305.59	483.05	996	1226	999	2151
ENSG00000081377	CDC14B	350.75	605.03	665.75	822.19	778.03	1234.41
ENSG00000081386	ZNF510	285.28	434.45	844.55	1101.48	1068.45	2063.96
ENSG00000081479	LRP2	0	0	0	1	4	3
ENSG00000081665	ZNF506	7	9	13	16	11.06	8.98
ENSG00000081692	JMJD4	849.03	801.58	1839.71	1604.24	1692.54	1048.66
ENSG00000081721	DUSP12	650	682	924	1083	1038	1190
ENSG00000081760	AACS	2088	1959.06	3828.95	3591.86	4376.68	3617.75
ENSG00000081791	DELE1	1571	1840	3858	3941	4159	4000.12
ENSG00000081800	SLC13A1	0.01	0	0	0	0	0
ENSG00000081803	CADPS2	1	10	0	3	5	8
ENSG00000081818	PCDHB4	14.86	13.98	6	10	12	19.63
ENSG00000081842	PCDHA6	0	0	0	0	0	0
ENSG00000081853	PCDHGA2	0	2.15	0	0	0	8.94
ENSG00000081870	HSPB11	1194	851	940.08	1056	900	1217
ENSG00000081913	PHLPP1	633	875.01	1019	1237	1394	1778
ENSG00000081923	ATP8B1	1055	1698.93	948.99	1233.94	1082.99	1962.91
ENSG00000081985	IL12RB2	1	9	6	2	1	4
ENSG00000082014	SMARCD3	308.38	307	486.15	457.88	512	321.48
ENSG00000082068	WDR70	835	1106.69	1417.32	1697.49	1685.67	2248.7
ENSG00000082074	FYB1	0	4	2	2	0	6
ENSG00000082126	MPP4	77	65	103.84	125.83	107.92	171.66
ENSG00000082146	STRADB	640.02	812	410.03	468	504.88	695.74
ENSG00000082153	BZW1	4387.63	6319.22	4431.99	5294.73	4222.2	7955.01
ENSG00000082175	PGR	9	15	18	8	17	19
ENSG00000082196	C1QTNF3	2	12	30.8	35	48	64.26
ENSG00000082212	ME2	739	1126	556	724.28	596.66	1063
ENSG00000082213	C5orf22	412	762	948	1177	1084	2283
ENSG00000082258	CCNT2	150	224	449	511	437	951
ENSG00000082269	FAM135A	76	119	82	71	61	161
ENSG00000082293	COL19A1	0	0	0	0	0	0
ENSG00000082397	EPB41L3	0	0	0	0	0	1
ENSG00000082438	COBLL1	7	9	16	21	15	34
ENSG00000082458	DLG3	351	383	419	477	539	652
ENSG00000082482	KCNK2	150	151	35	69	43	56
ENSG00000082497	SERTAD4	75.19	125	201.32	236	160.22	325.7
ENSG00000082512	TRAF5	96	160	104	121	103.01	192
ENSG00000082515	MRPL22	1273	1057	1414	1510	1406	808
ENSG00000082516	GEMIN5	1435	1882	1286	1678	1729	2383
ENSG00000082556	OPRK1	0	0	0	0	0	2
ENSG00000082641	NFE2L1	8163.64	8149.15	3722	4017.4	4337.13	3904
ENSG00000082684	SEMA5B	0	0	0	0	1	1
ENSG00000082701	GSK3B	1390	2166	813	971	897	1494.79
ENSG00000082781	ITGB5	1108	1133	1201	1100	1202	952
ENSG00000082805	ERC1	2585	3747	1849	2621.29	2473	3233
ENSG00000082898	XPO1	4221.56	6471.66	3773.97	4587.95	3690	7742.29
ENSG00000082929	LINC01587	0	0	0	0	0	0
ENSG00000082996	RNF13	125	202	155	160	149	366
ENSG00000083067	TRPM3	0	4	2	9	7	7.95
ENSG00000083093	PALB2	273	492	697	823	716	1375
ENSG00000083097	DOP1A	88.74	218.37	255.06	329.29	371.17	781.14
ENSG00000083099	LYRM2	920.47	1147.06	1162.97	1316.62	1023.69	1779.3
ENSG00000083123	BCKDHB	386	433	355.1	384.11	323	494
ENSG00000083168	KAT6A	1088	1986	1101	1510.05	1319.02	2249
ENSG00000083223	TUT7	193	394	1122	1280	1161	2901
ENSG00000083290	ULK2	139	239.51	139.29	224	206	355
ENSG00000083307	GRHL2	0	0	0	0	0	0
ENSG00000083312	TNPO1	2363	4191	1640	2040	1834	3697
ENSG00000083444	PLOD1	4387	4343	5157	4585	5208	3849
ENSG00000083454	P2RX5	204.71	198.73	197.36	180.22	165.44	144.91
ENSG00000083457	ITGAE	820	705	694	867.22	835	488
ENSG00000083520	DIS3	277.56	586.58	548.05	583.98	535.17	1597.43
ENSG00000083535	PIBF1	92	99	113	104	125	288
ENSG00000083544	TDRD3	70	123	140.01	171.07	165	252
ENSG00000083622	AC000061.1	0	0	0	0	0	0
ENSG00000083635	NUFIP1	318	377	647	774	754	1275
ENSG00000083642	PDS5B	399	737	445	518	449	1143
ENSG00000083720	OXCT1	1512.21	1589.97	1201.88	1362.31	1283.53	2203.42
ENSG00000083750	RRAGB	120	143	183	189	205	331
ENSG00000083782	EPYC	0	0	0	0	0	0
ENSG00000083799	CYLD	637	765	1312.99	1628	1369	2355
ENSG00000083807	SLC27A5	19.21	12.22	4	9.03	12.58	13.06
ENSG00000083812	ZNF324	303.67	469.88	1629.42	1504.24	1731.91	1225.56
ENSG00000083814	ZNF671	80	81	776.58	757	827	657
ENSG00000083817	ZNF416	193	192	1685.94	1818.9	1935.83	1473.74
ENSG00000083828	ZNF586	112.71	143.26	428.76	490.85	437.89	563.64
ENSG00000083838	ZNF446	613.25	402.04	1006.21	763.06	787.92	665.67
ENSG00000083844	ZNF264	278	313	670.63	768.78	772.61	966
ENSG00000083845	RPS5	14130.7	12600.5	14706.2	11904.4	12471.6	5990.5
ENSG00000083857	FAT1	2982	4412	1717	2444	2295	3766
ENSG00000083896	YTHDC1	818	1086	1061	1339	1061	2210
ENSG00000083937	CHMP2B	508	640	587	742	612	1105
ENSG00000084070	SMAP2	1664	1603	1941	2086	2245	2126
ENSG00000084072	PPIE	1866	1636	3082	2924	3232	2032.99
ENSG00000084073	ZMPSTE24	1059	1302	1017	1160	1013	2100
ENSG00000084090	STARD7	6220.09	7709.89	3372.07	4100.81	4567.19	5281.13
ENSG00000084092	NOA1	624	655	938	1101	1097	1462
ENSG00000084093	REST	373	692	955	1111	940	2115
ENSG00000084110	HAL	1	2	6	2	9	10
ENSG00000084112	SSH1	2270	3203.16	3035.61	3438	3396.11	4338
ENSG00000084207	GSTP1	16851	15765	22503	17869	19375	9434
ENSG00000084234	APLP2	7346.07	8409.74	6032.17	7281.11	7145	9095.41
ENSG00000084444	FAM234B	370	520.08	402	469	520	592
ENSG00000084453	SLCO1A2	5	2	2	3	1	5
ENSG00000084463	WBP11	3624	4356	3414	3771	3520	4798
ENSG00000084623	EIF3I	10247	9369.05	10811	10046	10412.9	6689
ENSG00000084628	NKAIN1	1	1	2	9	11	6
ENSG00000084636	COL16A1	203	209	356	387	307	380
ENSG00000084652	TXLNA	5997	6035	9134	8567	8607	7509
ENSG00000084674	APOB	1	5	1	5	1	1
ENSG00000084676	NCOA1	442	733	454	694	616	1277
ENSG00000084693	AGBL5	2233.02	2209	1901.01	1917.03	2208	1973.03
ENSG00000084710	EFR3B	1172	1335	933	1111.74	1183.29	1180.39
ENSG00000084731	KIF3C	1518	1749	1296	1229	1487	1260
ENSG00000084733	RAB10	2435	2936	1917	2373	2034	3307
ENSG00000084734	GCKR	4	2	11	8	12	12
ENSG00000084754	HADHA	7326	6450	6116	6491	6869	6203.01
ENSG00000084764	MAPRE3	564	604	892	786	881	781
ENSG00000084774	CAD	3980.1	4072.35	2407.55	2476.82	2856.74	2491.5
ENSG00000085063	CD59	10305.8	10811.9	7033.05	8210.63	7803.9	6858.7
ENSG00000085117	CD82	2321.87	2318.7	3939.09	3274.69	3360.58	2369.77
ENSG00000085185	BCORL1	253	278	315	352	390	369
ENSG00000085224	ATRX	1	1	1	3	1	2
ENSG00000085231	AK6	704.6	530.82	400.5	564.95	492.97	659.74
ENSG00000085265	FCN1	0	0	0	0	0	0
ENSG00000085274	MYNN	121.15	106.38	131.79	181.76	155.52	274.66
ENSG00000085276	MECOM	15	12	15	29	25	18
ENSG00000085365	SCAMP1	711	722.98	357.72	462	399.02	779.16
ENSG00000085377	PREP	1266.98	1359.95	1365	1459.95	1547.98	1541.95
ENSG00000085382	HACE1	144	219	299	384	321	720
ENSG00000085415	SEH1L	1647.88	2109.67	1464	1926	1485.02	2171.95
ENSG00000085433	WDR47	227	358	674	882	764	1403
ENSG00000085449	WDFY1	1431.08	2390.53	1779.16	1930.89	1615.01	3348.27
ENSG00000085465	OVGP1	0	1	6	2	5	7
ENSG00000085491	SLC25A24	1636.99	1949.04	1713.43	1921.38	1584.92	3162.78
ENSG00000085511	MAP3K4	444.49	709.56	672.22	791.57	859.39	1184.53
ENSG00000085514	PILRA	1	3.4	6.31	11.17	4.71	14.09
ENSG00000085552	IGSF9	6	1	8	5	8	7
ENSG00000085563	ABCB1	0	2	1	0	0	0
ENSG00000085644	ZNF213	660	637.29	1335	1223.76	1431	1252
ENSG00000085662	AKR1B1	5060.99	4432.08	5960.61	5433.55	5808.01	3446.12
ENSG00000085719	CPNE3	847	1116	591	791	641	1256
ENSG00000085721	RRN3	580.55	956.3	1686.95	2137.08	1970.19	3744.85
ENSG00000085733	CTTN	14029	15333	10949	11579	11329	12066
ENSG00000085741	WNT11	2	2	8	18	16	27
ENSG00000085760	MTIF2	472	628.08	279	341	339	640
ENSG00000085788	DDHD2	436	633	447	524.06	466.47	760
ENSG00000085831	TTC39A	3	5	26	27	23	24
ENSG00000085832	EPS15	770	1303	539	715	582	1103
ENSG00000085840	ORC1	963	1249.13	3070.1	3630.2	4067.22	5248.55
ENSG00000085871	MGST2	59	67	67	80	73	49
ENSG00000085872	CHERP	1810.88	2014.87	2641.78	2918.76	2948.26	3531.89
ENSG00000085978	ATG16L1	1518	1438	3429	3145	3530	2955
ENSG00000085982	USP40	930	1273	721	927.51	966	1272
ENSG00000085998	POMGNT1	2683.88	2467.07	1616.46	1283.83	1425.85	926.34
ENSG00000085999	RAD54L	1335.61	1420.43	2372.94	2402.87	3000.01	2843.89
ENSG00000086015	MAST2	3575.57	3830.89	4041.63	4005.28	4971.13	4342.37
ENSG00000086061	DNAJA1	5059	5348	3476	4321	3920	5474
ENSG00000086062	B4GALT1	1738	2038	2150	2653	2183	2636
ENSG00000086065	CHMP5	1577	1404	1249	1646	1348	1636
ENSG00000086102	NFX1	676	827.91	2216	2676	2265	3210
ENSG00000086159	AQP6	3	6	1	3	1	1.31
ENSG00000086189	DIMT1	704.05	837.25	761.21	932.67	837.03	1028.16
ENSG00000086200	IPO11	628	968	711	872	756	1546
ENSG00000086205	FOLH1	0	0	0	0	0	0
ENSG00000086232	EIF2AK1	2005.58	2455.1	2209.51	2780.2	2598.71	3531.9
ENSG00000086288	NME8	0	0	0	0	0	0
ENSG00000086289	EPDR1	64	94	48	55	41	59
ENSG00000086300	SNX10	0	0	0	0	0	0
ENSG00000086475	SEPHS1	2238	2203	1794	1798	1770	1866
ENSG00000086504	MRPL28	3477.55	3200.78	4503.87	3739.76	3799.46	1928.98
ENSG00000086506	HBQ1	0	0	0	0	0	0
ENSG00000086544	ITPKC	229	235	1060.94	893	1036.98	689
ENSG00000086548	CEACAM6	12.56	17.56	11.69	17	9.48	26.67
ENSG00000086570	FAT2	1	8.48	3.78	4.08	2.27	11
ENSG00000086589	RBM22	1175	1398	2340	2718	2587	3310
ENSG00000086598	TMED2	5433.18	6875.31	4932.54	6244.97	5603.08	7909.37
ENSG00000086619	ERO1B	29	46	68	73	77	136
ENSG00000086666	ZFAND6	1108	1241	1306	1632	1227	1857
ENSG00000086696	HSD17B2	0	0	1	2	0	0
ENSG00000086712	TXLNG	370.01	540.01	415.01	503	422	899
ENSG00000086717	PPEF1	0	0	0	0	1	0
ENSG00000086730	LAT2	52.93	47.53	129.71	116.27	117.45	116.38
ENSG00000086758	HUWE1	9835	13557	8915	12048	13812	18562
ENSG00000086827	ZW10	473	666	740	1041	859	1560
ENSG00000086848	ALG9	627.02	592.48	680.43	776.05	696.09	939.25
ENSG00000086967	MYBPC2	0	0	0	0	0	0
ENSG00000086991	NOX4	0	0	0	0	0	0
ENSG00000087008	ACOX3	1292.09	1330.3	1457.75	1287.29	1429.54	1232.43
ENSG00000087053	MTMR2	797.79	1281.81	966.63	1249.99	1089	2022.65
ENSG00000087074	PPP1R15A	2789	2525.08	36013	33772	37925	28801
ENSG00000087076	HSD17B14	113.46	96.78	158.59	116.59	131.57	69.72
ENSG00000087077	TRIP6	3212.91	3121.95	6285.21	5942.31	6009.65	4280.07
ENSG00000087085	ACHE	17	24	319	325	399	252
ENSG00000087086	FTL	22833	21170	19241	17751	18692	13465
ENSG00000087087	SRRT	6732.09	6195.05	11600.8	11260.7	15439.4	13279.9
ENSG00000087088	BAX	2029	2012	2577	2090	2246	1489
ENSG00000087095	NLK	580	754	529	604	685	995
ENSG00000087111	PIGS	2132	2140	2518	2562	3033	2645
ENSG00000087116	ADAMTS2	252	302	163	211	225	200
ENSG00000087128	TMPRSS11E	0	0	0	0	0	0
ENSG00000087152	ATXN7L3	3089	2871	2859.37	2687	3244	2571
ENSG00000087157	PGS1	839	991.98	3178	3278	3657	2896.08
ENSG00000087191	PSMC5	10959	9812.21	10161.6	10219.7	10542.7	8108.87
ENSG00000087206	UIMC1	854	986	1926	2469	2566.03	3437
ENSG00000087237	CETP	1	0	1	2	0	0
ENSG00000087245	MMP2	249	242	112	86	109	83
ENSG00000087250	MT3	0	0	0	0	0	0
ENSG00000087253	LPCAT2	3	0	1	0	0	0
ENSG00000087258	GNAO1	361	395	416	418	454	445
ENSG00000087263	OGFOD1	834.86	1019.31	1069.72	1482.7	1360.68	1861
ENSG00000087266	SH3BP2	1566	1809.99	2986	2940	3181	3065
ENSG00000087269	NOP14	2418.91	2233.79	4164.42	4680.27	4840.27	5032.48
ENSG00000087274	ADD1	12876	12931	9200.35	9376	9479	9412
ENSG00000087299	L2HGDH	349.15	525.63	642.18	742.65	618.51	1008.76
ENSG00000087301	TXNDC16	81	113	294	349	333	732
ENSG00000087302	RTRAF	3368.3	2950.65	2162.98	2937.92	2562.18	3478.76
ENSG00000087303	NID2	212.7	256.35	54.02	72.08	71.07	87.24
ENSG00000087338	GMCL1	195	286	475	593	515	1062.88
ENSG00000087365	SF3B2	18295.2	16695.6	25485.3	26266.1	26804	23995
ENSG00000087448	KLHL42	632	945	2013.6	2136	2227	2776.32
ENSG00000087460	GNAS	28382	28167.6	23867	24124	24388.4	25054.2
ENSG00000087470	DNM1L	1154.66	1793.99	1319.41	1695.95	1586.89	3133.4
ENSG00000087494	PTHLH	66	84	260	263	285	318
ENSG00000087495	PHACTR3	0	0	0	0	1	2
ENSG00000087502	ERGIC2	827	711	301	335.44	331.06	628.46
ENSG00000087510	TFAP2C	2	1	1	1	5	2
ENSG00000087586	AURKA	3354	4203.99	4007.99	4727	4421.99	5750
ENSG00000087589	CASS4	1	3	11	8	5	10
ENSG00000087842	PIR	129	95	70	112	110	82
ENSG00000087884	AAMDC	755	700	818.69	899.1	871.14	565.18
ENSG00000087903	RFX2	367	423.01	951	1009	1006	1047
ENSG00000087995	METTL2A	1399.35	1228.75	2083.23	2107.16	2342.99	1794.11
ENSG00000088002	SULT2B1	1	3	0	3.05	0	3
ENSG00000088035	ALG6	154	173	43	54	69	91
ENSG00000088038	CNOT3	1490.94	1645.82	1953.05	1724.85	2276.36	2261.16
ENSG00000088053	GP6	1	1	0	3	6	4
ENSG00000088179	PTPN4	84	135	113.26	99	90	226
ENSG00000088205	DDX18	1958.19	2398	1707.87	2135	1718	3431.86
ENSG00000088247	KHSRP	10475	10005	11276	11731	12100	12236
ENSG00000088256	GNA11	5380	5118	3917	3853	4069.79	3621.72
ENSG00000088280	ASAP3	765	730	1824	1655	1983	1454
ENSG00000088298	EDEM2	662	686	868	862	882	668
ENSG00000088305	DNMT3B	189	184	171	173	204	208
ENSG00000088320	REM1	1	0	1	1	0	0
ENSG00000088325	TPX2	9125	10666	10386	12487	11666	15290.2
ENSG00000088340	FER1L4	27	36	47	31	45	46
ENSG00000088356	PDRG1	1526	1385	5690	5400	5502	3116
ENSG00000088367	EPB41L1	3448	3565	1631	1818	1815	1960
ENSG00000088386	SLC15A1	0	1	3	4	0	2
ENSG00000088387	DOCK9	603.6	1084.91	630.21	857.88	770.01	1416.36
ENSG00000088448	ANKRD10	499	601	841	996	900	1126
ENSG00000088451	TGDS	125	127	282	318	287	557
ENSG00000088538	DOCK3	112	168	254	336	303	452
ENSG00000088543	C3orf18	454	454	680	550	662	470
ENSG00000088682	COQ9	798.2	732.34	1924.67	1588.57	1843.47	1262.28
ENSG00000088726	TMEM40	50	51	131	134	107	84
ENSG00000088727	KIF9	129.58	143.76	178.16	244.89	230.91	234.77
ENSG00000088756	ARHGAP28	78	128.7	119	119.21	100	236.04
ENSG00000088766	CRLS1	1007.55	907.35	594.34	703.11	730.98	843.34
ENSG00000088782	DEFB127	0	0	0	0	0	0
ENSG00000088808	PPP1R13B	340.82	443.72	972.59	1031.95	1322.33	1433.49
ENSG00000088812	ATRN	2152	2592	1605.63	1790	1860	2332
ENSG00000088826	SMOX	727	727	4505	3508.11	3805	2315
ENSG00000088827	SIGLEC1	0	0	1	0	1	1
ENSG00000088832	FKBP1A	7637.97	8253.23	5591.73	5981.48	6305.28	6830.13
ENSG00000088833	NSFL1C	6022	5334	6999	6932	7120	5836
ENSG00000088836	SLC4A11	262	319	530	501	633	600
ENSG00000088854	C20orf194	679	867	976	1165	1206	1437.01
ENSG00000088876	ZNF343	261	345.4	642.09	728.02	705.7	939.37
ENSG00000088881	EBF4	384	356	383	298	354	289
ENSG00000088882	CPXM1	10	11	10	7	12	4
ENSG00000088888	MAVS	5956.54	6605.99	4806.87	5018.01	5480.01	5297.89
ENSG00000088899	LZTS3	945	883	1160	1204	1331	1182
ENSG00000088926	F11	0	0	0	0	0	0
ENSG00000088930	XRN2	4430.1	4980.6	4108.09	5213.72	3901.78	6572.7
ENSG00000088970	KIZ	110	148	165	256	213	451
ENSG00000088986	DYNLL1	6420	5620	4235	4552	4445.27	3822
ENSG00000088992	TESC	1	0	1	5	4	3
ENSG00000089006	SNX5	1938.23	2514.26	2750.77	3410.02	3214.83	4977.38
ENSG00000089009	RPL6	22920.2	19546.4	10996.5	13655.6	12075	15079.6
ENSG00000089012	SIRPG	1	0	0	0	0	0
ENSG00000089022	MAPKAPK5	760.47	933.93	1026.74	1259.95	1357.59	1697.84
ENSG00000089041	P2RX7	53.61	70.96	95.8	115.59	126.8	122
ENSG00000089048	ESF1	136	149	242	273	243	787
ENSG00000089050	RBBP9	709	780	638.68	762	642	941.11
ENSG00000089053	ANAPC5	4728	4692.39	4751.7	4858	4888.04	4154.05
ENSG00000089057	SLC23A2	1333	1820	734	831	753	1025
ENSG00000089060	SLC8B1	1047	1059	1161.01	1113.6	1413	1060
ENSG00000089063	TMEM230	2073	2617	1736	1950	1992	2570
ENSG00000089091	DZANK1	77.54	100.77	399	484.09	487.92	716.85
ENSG00000089094	KDM2B	1769.49	2117.37	1906.52	2105.31	2390.66	2487.18
ENSG00000089101	CFAP61	0	1	1	3	0	5
ENSG00000089116	LHX5	0	0	6	6	9	9
ENSG00000089123	TASP1	175	133	232	297	294	394
ENSG00000089127	OAS1	27	41	88	68	65	58
ENSG00000089154	GCN1	8922	8679	6688.88	6288.04	7348	5829.02
ENSG00000089157	RPLP0	74950	63271.5	61888.1	56245.4	57769	36014.8
ENSG00000089159	PXN	17461.4	18991.9	12083.5	12170	12454.8	12492.9
ENSG00000089163	SIRT4	21	23	56	36	45	40
ENSG00000089169	RPH3A	0	1	0	2	2	0
ENSG00000089177	KIF16B	173	284	254	279	257	506
ENSG00000089195	TRMT6	832	938	1290	1628	1337	2287
ENSG00000089199	CHGB	1	1	28	35	21	39
ENSG00000089220	PEBP1	9387	7864	6608.99	6832	6841	5650
ENSG00000089225	TBX5	1	1	2	6	3	4
ENSG00000089234	BRAP	696	820	1683	2087	1893	2899
ENSG00000089248	ERP29	5052	4882.5	7485.47	7122.3	7298.54	4962
ENSG00000089250	NOS1	0	1	1	0	2	4
ENSG00000089280	FUS	19641	18947	24946	25986.5	25107	23044
ENSG00000089289	IGBP1	1003	1065	1314	1648	1691	1691
ENSG00000089327	FXYD5	2307	2288	2095	2014	1966	1682
ENSG00000089335	ZNF302	150	167.88	260.21	298	244.65	550.23
ENSG00000089351	GRAMD1A	973	956	1347	1171	1267	1037
ENSG00000089356	FXYD3	0	0	0	0	0	0
ENSG00000089472	HEPH	0	0	0	0	0	0
ENSG00000089486	CDIP1	964	1040	1476	1363	1396	1118
ENSG00000089505	CMTM1	55.5	116.88	108.14	124.5	108.45	150.88
ENSG00000089558	KCNH4	0	0	6	0	4	3
ENSG00000089597	GANAB	23877.3	23147.8	28258.1	26448.8	28334.4	22894.8
ENSG00000089639	GMIP	518	486	954	790	944	751
ENSG00000089682	RBM41	103	128.02	190.25	212.61	209	459
ENSG00000089685	BIRC5	8080.69	7388.79	11064.6	10395.8	10708.9	7589.94
ENSG00000089692	LAG3	7	17	5	13	14	11
ENSG00000089693	MLF2	10080	9841	9549	8766	9424	7318
ENSG00000089723	OTUB2	86.13	89.47	42.62	53.25	43.03	44.1
ENSG00000089737	DDX24	4050.87	3920.53	4679.38	5523.75	5251.97	6073.9
ENSG00000089775	ZBTB25	259.86	391.68	676.81	754.96	693.04	1120.59
ENSG00000089818	NECAP1	784.07	1014.7	1143.3	1354.61	1359.71	1727.98
ENSG00000089820	ARHGAP4	269.33	241.85	658.37	525.2	491.11	308.76
ENSG00000089847	ANKRD24	4	9	14	15	21	10
ENSG00000089876	DHX32	356.6	520.9	278.25	328.07	333.92	531.31
ENSG00000089902	RCOR1	608	899	820	1069	975	1500
ENSG00000089916	GPATCH2L	366	534	661	756	682	1114
ENSG00000090006	LTBP4	1793	2034	2490.37	2103	2365	1859.07
ENSG00000090013	BLVRB	1029	1024	1502	1205	1342	704
ENSG00000090020	SLC9A1	1138	1380	2273	2146	2601	2736
ENSG00000090054	SPTLC1	2186	2024.85	1784.07	2248.48	1840	2770.61
ENSG00000090060	PAPOLA	1180	2001	981	1277	1144.1	2409
ENSG00000090061	CCNK	1408.34	1543	1637.53	1686.2	1752.69	1963.63
ENSG00000090097	PCBP4	2368	2285	2960	2631	2963	2202
ENSG00000090104	RGS1	0	0	0	0	0	0
ENSG00000090238	YPEL3	1	4	0	1	1	5
ENSG00000090263	MRPS33	569.72	588.95	636.01	832	823.79	702
ENSG00000090266	NDUFB2	2231.73	1961.31	1983.7	1961.38	2194.99	929.95
ENSG00000090273	NUDC	9472.11	8365.1	10607	10061.6	10231	8028.41
ENSG00000090316	MAEA	2715	2932.08	2321.03	2371.86	2516	2545.99
ENSG00000090339	ICAM1	532.08	594.48	13520.9	13119.9	13234.6	11209.6
ENSG00000090372	STRN4	3162	3203	6647	5913	6839	5514
ENSG00000090376	IRAK3	20	40	33	44	57	83
ENSG00000090382	LYZ	9	3.92	12	5.36	4.93	2.49
ENSG00000090402	SI	0	0	0	0	0	0
ENSG00000090432	MUL1	1368	1219	2915	2811	2895	2275
ENSG00000090447	TFAP4	328	281	123	112	122	142
ENSG00000090470	PDCD7	1121	1104	2129.11	2217	2157	2420
ENSG00000090487	SPG21	1775	1872	1355	1487	1551.91	1534.66
ENSG00000090512	FETUB	0	0	0	0	0	0
ENSG00000090520	DNAJB11	1278.9	1138.77	889.49	1088.89	966.89	1360.36
ENSG00000090530	P3H2	152	181	278	377	359	321
ENSG00000090534	THPO	0	2	2	0	0	0
ENSG00000090539	CHRD	5	15	15	14	18	8
ENSG00000090554	FLT3LG	115.76	95	80.09	78.34	78.63	66
ENSG00000090565	RAB11FIP3	1883	1884	1830	1775	2236	1911
ENSG00000090581	GNPTG	825.02	809.83	1125.53	1170.7	1191.58	1058.98
ENSG00000090612	ZNF268	145.02	298.01	390.71	413.5	343.09	949.27
ENSG00000090615	GOLGA3	3647.09	3899.54	2278.47	2346.95	2506.15	2774.28
ENSG00000090621	PABPC4	3238.99	3713.99	3560.23	3894.64	4443	5141.21
ENSG00000090659	CD209	1	0	0	1	5	1
ENSG00000090661	CERS4	219	232	325	272	321	198
ENSG00000090674	MCOLN1	561.36	563.47	1099.5	1004.91	1175.71	1041
ENSG00000090686	USP48	725	1043	680	962	842	1491
ENSG00000090776	EFNB1	492	413	756	727	831	774
ENSG00000090857	PDPR	1663.96	2214.32	2681.06	3300.29	3970.13	4811.04
ENSG00000090861	AARS1	6906.81	6167.93	7361.52	7396.6	8163.8	6752.25
ENSG00000090863	GLG1	3472.9	3765.97	2703.61	3279.61	3421.45	3467.46
ENSG00000090889	KIF4A	3935	4916.99	4392	5717	5355.99	7550.98
ENSG00000090905	TNRC6A	817	1597	983.01	1250	1088	2122
ENSG00000090924	PLEKHG2	564	635	1369.41	1398	1456	1473.47
ENSG00000090932	DLL3	18	22	41	22	22	22
ENSG00000090971	NAT14	910.49	875.48	1732.42	1417.71	1485.53	830.78
ENSG00000090975	PITPNM2	498	521	440	475	438	406
ENSG00000090989	EXOC1	571.96	686.92	756	985.96	815.93	1529.91
ENSG00000091009	RBM27	366.63	591.1	394.23	550.77	420.37	988.8
ENSG00000091010	POU4F3	0	0	7	2	12	9
ENSG00000091039	OSBPL8	692	1133	508	543	456	1481
ENSG00000091073	DTX2	542.54	557.05	1503.87	1288.58	1393.87	1222.31
ENSG00000091106	NLRC4	2	6	2	8	8	12
ENSG00000091127	PUS7	682	892	748.31	931	938	1466.98
ENSG00000091128	LAMB4	1	1	6.4	0	2	5
ENSG00000091129	NRCAM	0	1	0	1	1	1
ENSG00000091136	LAMB1	1528	2010	843	1048	1112.85	1772
ENSG00000091137	SLC26A4	6.99	6	2	3	3	10
ENSG00000091138	SLC26A3	0	0	0	0	0	0
ENSG00000091140	DLD	1676	2009	1271	1464	1282	2514
ENSG00000091157	WDR7	287.26	561	608.4	848.88	718.36	1382.93
ENSG00000091164	TXNL1	1881	1770.34	1809.18	2224.12	1817.64	2304.08
ENSG00000091181	IL5RA	0	0	0	0	0	0
ENSG00000091262	ABCC6	31.98	43.54	61.81	58.7	79.97	67.76
ENSG00000091317	CMTM6	1592	2407	1405	1768	1347	2389
ENSG00000091409	ITGA6	1386	1988	399	469	404	724.98
ENSG00000091428	RAPGEF4	3	1	6	11	23	22
ENSG00000091436	MAP3K20	996.99	1732.88	1066.89	1350.99	1226.77	2038.82
ENSG00000091482	SMPX	0	0	0	0	0	0
ENSG00000091483	FH	2187	1998	1750	1910	1759	1985
ENSG00000091490	SEL1L3	1629	1836	538	578	547	629
ENSG00000091513	TF	25.58	22.7	32.94	35.97	34.79	34.14
ENSG00000091527	CDV3	3851	5427	5674	6885	5681	9008
ENSG00000091536	MYO15A	1	1	10	2	8	8
ENSG00000091542	ALKBH5	3944.84	4060.91	3279.9	3260.33	3910.8	3430.49
ENSG00000091583	APOH	0	0	0	0	1	0
ENSG00000091592	NLRP1	738.67	773.27	1245.67	1382.28	1420.79	1333.42
ENSG00000091622	PITPNM3	235	291	305.01	340.03	368.01	437
ENSG00000091640	SPAG7	1090.95	894.64	1526.2	1531.49	1517.82	985.13
ENSG00000091651	ORC6	955.94	1080.91	2988.83	3392.75	2903.65	3224.17
ENSG00000091656	ZFHX4	227	424	325	440	348	755
ENSG00000091664	SLC17A6	0	0	0	0	0	0
ENSG00000091704	CPA1	0	0	1	0	0	1
ENSG00000091732	ZC3HC1	758	869	1463	1625	1829	1430
ENSG00000091831	ESR1	1	10	8	8	5	11
ENSG00000091844	RGS17	38	45	33	64	29	95
ENSG00000091879	ANGPT2	1	0	3	2	2	2
ENSG00000091947	TMEM101	1092	1139	1354	1119	1188	750
ENSG00000091972	CD200	10	23	41	40.35	33	66
ENSG00000091986	CCDC80	4159	4776	1121	1385.96	1294	1778
ENSG00000092009	CMA1	0	0	0	0	1	0
ENSG00000092010	PSME1	3275	3021	3230	3059	3038	2075
ENSG00000092020	PPP2R3C	496	425	424.82	535.46	475.42	777.27
ENSG00000092036	HAUS4	1215.02	1096.77	1786.84	1785.68	1727.93	1303.32
ENSG00000092051	JPH4	30	36	30	28	42	36
ENSG00000092054	MYH7	83.03	132.75	152.59	221.81	111.03	258.39
ENSG00000092067	CEBPE	3	0	1	1	0	1
ENSG00000092068	SLC7A8	31	30	32	33	31	16
ENSG00000092094	OSGEP	879	821	1215.99	1102.99	1303	986.96
ENSG00000092096	SLC22A17	455	496	696	634	768	536
ENSG00000092098	RNF31	1222.6	1085.96	3045.38	2513.38	3174.76	2293.28
ENSG00000092108	SCFD1	600	652	676	613	618	1344
ENSG00000092140	G2E3	148	229	373	452	369	963
ENSG00000092148	HECTD1	1015	1828.89	659	843	703	1644.65
ENSG00000092199	HNRNPC	21333.1	20071.9	22534.6	25008.5	22419.6	22756.9
ENSG00000092200	RPGRIP1	1	1	2	1	1	2
ENSG00000092201	SUPT16H	3897.72	6580.62	1388.09	1648.5	1335.15	2603.67
ENSG00000092203	TOX4	3484.48	3414.74	5080.31	5386.25	5177.33	4845.45
ENSG00000092208	GEMIN2	230	224	193	262	258.11	350
ENSG00000092295	TGM1	50	56	60	56	60	34
ENSG00000092330	TINF2	2161	2058	3998	3663	3928	3083
ENSG00000092345	DAZL	0	0	0	0	0	0
ENSG00000092377	TBL1Y	0	0	0	0	0	0
ENSG00000092421	SEMA6A	10.66	18.49	22.22	10	24.36	19
ENSG00000092439	TRPM7	186.31	383.45	427.03	527.38	516.11	1429.43
ENSG00000092445	TYRO3	1497.18	1479.52	2921.9	2696.61	3003.39	2178
ENSG00000092470	WDR76	966	1261.83	2989	3858.32	3291.95	5043
ENSG00000092529	CAPN3	8.54	3	2.3	18	11	16.47
ENSG00000092531	SNAP23	783.02	1080.98	1874.58	2427.67	1767.78	2960.42
ENSG00000092607	TBX15	0	1	4	2	7	10
ENSG00000092621	PHGDH	4858	4534	4806	4359	4824	3165
ENSG00000092758	COL9A3	2	2	6	4	7	4
ENSG00000092820	EZR	33223	28898	41233	40442	39571	37995
ENSG00000092841	MYL6	41845.6	36471.6	42583.8	39513	40562.6	19432.2
ENSG00000092847	AGO1	1928.16	2474	1105	1320.12	1339.06	1723
ENSG00000092850	TEKT2	0	1	2	0	0	0
ENSG00000092853	CLSPN	1542.48	2658.16	3397.78	4247.32	3820.28	7754.79
ENSG00000092871	RFFL	563.39	763.04	2034.96	2409.27	2129.43	3092.26
ENSG00000092929	UNC13D	39.18	40	47.01	42	46	23
ENSG00000092931	MFSD11	439.79	493.68	800.85	898.9	996.71	946.09
ENSG00000092964	DPYSL2	2608	3507	802	978	855	1306
ENSG00000092969	TGFB2	317.27	483.6	448.06	552.6	377.26	763
ENSG00000092978	GPATCH2	196	254	607	793.88	631	1178
ENSG00000093000	NUP50	1100	2008	1264.82	1559	1345	2556
ENSG00000093009	CDC45	2064	2009	5634	5664	5793	4913
ENSG00000093010	COMT	2084	1980.02	2017	1782	1860.02	1402.04
ENSG00000093072	ADA2	16	18	23	10	32	18.95
ENSG00000093100	AC016026.1	382.01	412.37	635.49	590.51	637.38	716.48
ENSG00000093134	VNN3	0	0	0	0	0	0
ENSG00000093144	ECHDC1	488	527	674	716	672	1292
[truncated: 14,384 more rows]
