# Supplementary material for: A survey of optimal strategy for signature-based drug repositioning and an application to liver cancer
Source: eLife journal article supplement (doi:10.7554/elife.71880), 2022-02-18

Raw unedited plots

Collagen I

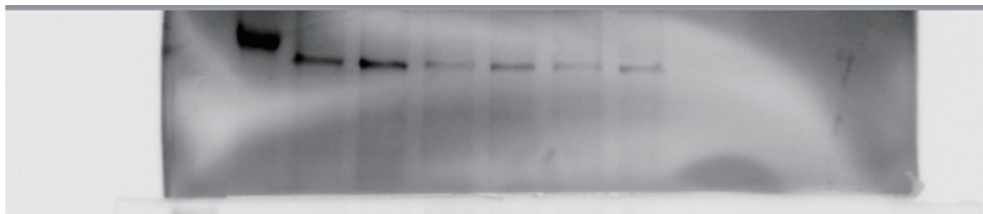

$\alpha$ -SMA

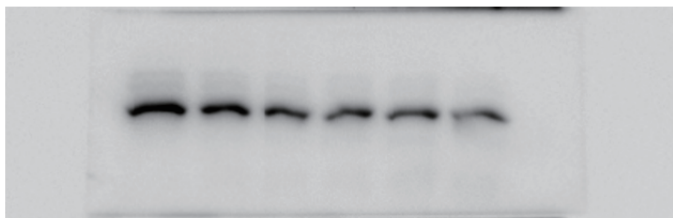

HSP90

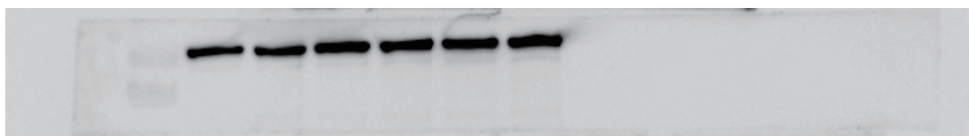

Labelled plots

ctrl 0 0.1 0.5 1 5 ( $\mu$ M)

Collagen I

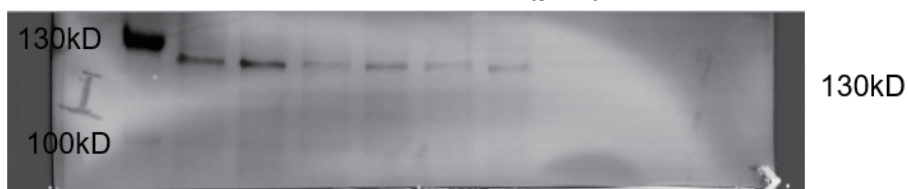

ctrl 0 0.1 0.5 1 5 ( $\mu$ M)

$\alpha$ -SMA

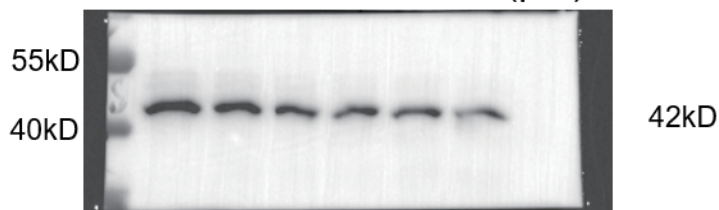

ctrl 0 0.1 0.5 1 5 ( $\mu$ M)

HSP90

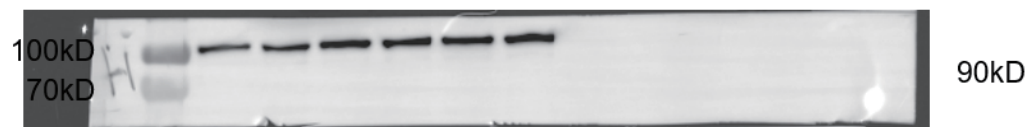

Supplement: supp [file elife-71880-supp-v1.zip › elife_poa_e71880_Figure_8_source_data_2.pdf]
