# Supplementary material for: A survey of optimal strategy for signature-based drug repositioning and an application to liver cancer
Source: eLife journal article supplement (doi:10.7554/elife.71880), 2022-02-18
Supplement: supp [file elife-71880-supp-v1.zip › elife_poa_e71880_Supplementary_file_1.xlsx]

## Sheet: Sheet1
Supplementary file 1A: Pharmacogenomic datasets used in this study. A summary of the basic information of included pharmacogenomic datasets.
Dataset name	Data type	Platform/Assay	Drug response metrics	No. of cell lines	No. of compounds	[PMID]
LINCS	Pharmacologic perturbation	L1000	/	77 (two HCC cell lines)	19811	29195078
ChEMBL	Manually curated database	/	IC50, EC50, etc.	/	/	30398643
CTRP	Cell viability measurements	CellTiter Glo	AUC	860 (22 HCC cell lines)	481	26656090
LIMORE	Cell viability measurements	CellTiter Glo	IC50, Activity Area, Emax	81 HCC cell lines	90	31378681
PRISM	Cell viability measurements	PRISM Viability Assay	IC50, EC50, AUC	482 (17 HCC cell lines)	1448	32613204

## Sheet: Sheet2
Supplementary file 1B: Transcriptomic datasets used in this study. A summary of the basic information of included transcriptomic datasets.
Dataset name	Country	Year	Platform	Data type	Organism	Follow-up data	Sample size	[References]
E-TABM-36	USA	2007	Affymetrix U133A	Microarray	Homo sapiens	Present	57	22105560
GSE14520	China	2010	Affymetrix U133A	Microarray	Homo sapiens	Present	242	22202459
GSE54236	Italy	2014	Agilent-014850	Microarray	Homo sapiens	Present	78	25666192
GSE76427	Singapore	2015	Illumina HumanHT-12 v4.0	Microarray	Homo sapiens	Present	115	29117471
GSE84005	China	2016	Affymetrix Human Exon 1.0	Microarray	Homo sapiens	Absent	38	/
GSE6764	USA	2007	Affymetrix U133 Plus 2.0	Microarray	Homo sapiens	Absent	75	17393520
GSE15654	USA	2009	Illumina HumanRef-8	Microarray	Homo sapiens	Present	216	23333348
GSE89377	South Korea	2016	Illumina HumanHT-12 V3.0	Microarray	Homo sapiens	Absent	107	/
GSE84044	China	2016	Affymetrix U133 Plus 2.0	Microarray	Homo sapiens	Absent	124	28262670
GSE27640	USA	2011	Illumina MouseRef-8 v2.0	Microarray	Mus musculus	/	4	24677197
GSE71379	USA	2015	Illumina MouseRef-8 v2.0	Microarray	Mus musculus	/	5	27960085
GSE19057	USA	2009	Illumina ratRef-12 v1.0	Microarray	Rattus norvegicus	/	6	24677197
GSE63726	USA	2014	Illumina ratRef-12 v1.0	Microarray	Rattus norvegicus	/	6	27960085
CHCC-HBV	China	2019	Illumina HiSeq X Ten	RNA-seq	Homo sapiens	Present	159	31585088
