# Supplementary material for: A survey of optimal strategy for signature-based drug repositioning and an application to liver cancer
Source: eLife journal article supplement (doi:10.7554/elife.71880), 2022-02-18
Supplement: supp [file elife-71880-supp-v1.zip › elife_poa_e71880_Supplementary_file_2.xlsx]

## Sheet: Sheet1
Supplementary file 2: Cosine similarity within different drugs of LINCS. L2 and L3-level similarities were presented resepectively.
Compound-level (L2) similarity scores			MOA-level (L3) similarity scores
Compound name	Similarity scores		MOA name	Similarity scores	Compound number
BI-2536	0.681512		HDAC inhibitor	0.466092	13
vorinostat	0.6573		IKK inhibitor	0.44733	5
doxorubicin	0.656008		mTOR inhibitor	0.417741	11
trichostatin-a	0.652772		CDK inhibitor	0.402106	8
BRD-K92317137	0.624898		topoisomerase inhibitor	0.383412	9
homoharringtonine	0.61504		protein synthesis inhibitor	0.350177	7
KU-0060648	0.609654		PI3K inhibitor	0.340955	7
ZG-10	0.605262		HSP inhibitor	0.308352	6
pirarubicin	0.597073		NFkB pathway inhibitor	0.284228	9
belinostat	0.59357		JAK inhibitor	0.274746	6
apicidin	0.588626		glycogen synthase kinase inhibitor	0.252931	6
JNK-9L	0.587313		PARP inhibitor	0.244319	6
dacinostat	0.585613		BCL inhibitor	0.208597	5
dorsomorphin	0.584219		ATPase inhibitor	0.193467	6
ixazomib	0.583551		SRC inhibitor	0.186223	8
TG-101348	0.571646		Bcr-Abl kinase inhibitor	0.178537	5
PCI-24781	0.570185		Aurora kinase inhibitor	0.16431	7
BRD-K83670234	0.568678		MEK inhibitor	0.163	10
BRD-K53932786	0.559433		selective serotonin reuptake inhibitor (SSRI)	0.153836	6
cycloheximide	0.556825		tubulin polymerization inhibitor	0.144353	13
HC-toxin	0.556621		EGFR inhibitor	0.143242	17
BRD-K90999434	0.554531		FLT3 inhibitor	0.143242	9
NVP-AUY922	0.552446		KIT inhibitor	0.143198	9
mitoxantrone	0.550238		RAF inhibitor	0.124539	6
scriptaid	0.547746		HMGCR inhibitor	0.113692	8
puromycin	0.546018		PDGFR tyrosine kinase receptor inhibitor	0.112846	12
XMD-1150	0.5421		retinoid receptor agonist	0.111913	8
merck-ketone	0.540841		VEGFR inhibitor	0.108927	12
CGP-60474	0.540491		tricyclic antidepressant	0.101727	5
PHA-793887	0.533017		benzodiazepine receptor agonist	0.0997475	8
lestaurtinib	0.528892		p38 MAPK inhibitor	0.0986095	8
PP-30	0.521679		tachykinin antagonist	0.0935081	7
BRD-K26304855	0.518856		bacterial cell wall synthesis inhibitor	0.0839191	11
HG-5-113-01	0.517261		opioid receptor antagonist	0.0742161	6
brefeldin-a	0.51724		progesterone receptor agonist	0.0698561	11
piperlongumine	0.514736		opioid receptor agonist	0.0645432	5
camptothecin	0.511048		glucocorticoid receptor agonist	0.0631173	25
KU-0063794	0.509004		calcium channel blocker	0.0603971	18
kinetin-riboside	0.508771		PPAR receptor agonist	0.0592319	18
JAK3-inhibitor-VI	0.507659		dopamine reuptake inhibitor	0.0566128	5
NVP-TAE684	0.505767		histamine receptor agonist	0.054939	7
phorbol-12-myristate-13-acetate	0.5016		acetylcholine receptor agonist	0.0543724	9
bisindolylmaleimide	0.499185		estrogen receptor antagonist	0.0512458	8
aminopurvalanol-a	0.499093		prostanoid receptor antagonist	0.0509117	5
AZD-8055	0.498964		GABA receptor modulator	0.0494565	7
CT-200783	0.498415		tyrosine kinase inhibitor	0.0494451	9
BX-795	0.496852		cytochrome P450 inhibitor	0.0477296	8
BRD-K75081836	0.496036		serotonin receptor agonist	0.0471841	22
MG-132	0.495823		DNA synthesis inhibitor	0.0411526	6
VU-0418946-1	0.494343		local anesthetic	0.0409343	5
VU-0410183-2	0.481154		serotonin receptor antagonist	0.0402357	45
PIK-90	0.478663		adenosine receptor antagonist	0.0392824	8
cucurbitacin-i	0.477622		dopamine receptor agonist	0.0390396	17
bufalin	0.474807		dopamine receptor antagonist	0.0386978	42
clopidogrel	0.473793		adrenergic receptor agonist	0.0380028	27
torin-2	0.471532		adrenergic receptor antagonist	0.0373478	34
MK-1775	0.470103		nitric oxide synthase inhibitor	0.0371924	5
BRD-K28366633	0.468922		monoamine oxidase inhibitor	0.0300435	7
pyrvinium-pamoate	0.468454		sterol demethylase inhibitor	0.0296061	5
prostratin	0.467226		carbonic anhydrase inhibitor	0.0274831	6
entinostat	0.466092		histamine receptor antagonist	0.0256569	29
mocetinostat	0.465897		potassium channel activator	0.0242229	7
TPCA-1	0.46521		estrogen receptor agonist	0.0239896	15
mitomycin-c	0.459017		sodium channel blocker	0.0236214	19
everolimus	0.456833		GABA receptor antagonist	0.0233022	9
PAC-1	0.456573		leukotriene receptor antagonist	0.0223143	5
MD-II-008-P	0.455892		cyclooxygenase inhibitor	0.0180885	34
chromomycin-a3	0.455795		norepinephrine reuptake inhibitor	0.0173612	5
BRD-K56411643	0.45391		sigma receptor antagonist	0.0158227	5
CP-466722	0.449568		angiotensin converting enzyme inhibitor	0.015247	5
BRD-K78385490	0.448104		potassium channel blocker	0.0136893	8
XMD-16144	0.44797		phosphodiesterase inhibitor	0.0127766	27
BRD-K53423944	0.447883		acetylcholine receptor antagonist	0.012372	21
IKK-2-inhibitor-V	0.44733		glutamate receptor antagonist	0.0110249	21
cinobufagin	0.445499		angiotensin receptor antagonist	0.00305888	7
pyroxamide	0.445279
BRD-K62459624	0.444333
BRD-K77547920	0.443737
EMF-sumo1-11	0.442144
roscovitine	0.441123
BRD-A36275421	0.440655
temsirolimus	0.438974
SJ-172550	0.438651
XMD-885	0.438456
BRD-K00313977	0.435045
tubastatin-a	0.43376
JWE-035	0.432962
BRD-K73261812	0.43264
BRD-A11087911	0.430786
ellipticine	0.430536
PKCbeta-inhibitor	0.429584
ingenol	0.419331
MK-2206	0.419234
PI-103	0.41843
neratinib	0.417755
WYE-125132	0.417741
BRD-K06217810	0.417485
BRD-K03829970	0.415673
H-9	0.415214
digoxin	0.413823
ST-4062971	0.413577
XMD-892	0.412913
niclosamide	0.411266
fostamatinib	0.410793
JW-7-24-1	0.409234
AKT-inhibitor-1-2	0.408399
SB-216763	0.407962
BRD-K06765193	0.407731
triciribine	0.407701
BRD-K89224880	0.407394
7b-cis	0.404751
parthenolide	0.403777
MW-STK33-1C	0.403265
BRD-K14027855	0.403027
F-1566-0341	0.403026
BRD-K19724398	0.402672
SB-218078	0.402496
methylene-blue	0.400703
BMS-536924	0.399899
proscillaridin	0.39989
cymarin	0.399702
BRD-K18724229	0.399528
BRD-A81530502	0.399134
MD-040	0.398119
EMF-bca1-16	0.397211
YK-4279	0.396954
strophanthidin	0.39446
SA-792709	0.394274
BRD-K95138506	0.394273
L-690488	0.393999
BRD-K95606637	0.388917
BRD-K81647657	0.386454
OSI-027	0.386168
sirolimus	0.384893
torin-1	0.384819
teniposide	0.383412
BMS-641988	0.38318
amonafide	0.382872
BRD-K49094915	0.382616
sitagliptin	0.381514
KU-C104337	0.379045
obatoclax	0.378066
YM-155	0.376491
BRD-K98824517	0.375611
BRD-K18726304	0.375502
MW-STK33-2B	0.374657
BRD-K23149109	0.374495
ZSTK-474	0.374117
amsacrine	0.372949
ST-4075437	0.372817
ouabain	0.372743
BRD-K08448573	0.371972
QL-X-138	0.371809
NSC-3852	0.37133
RS-I-002-6	0.371184
pevonedistat	0.370976
BAX-channel-blocker	0.370581
PI-828	0.369151
FCCP	0.368826
BRD-K31706415	0.367905
serdemetan	0.36616
BRD-K82732294	0.365925
APHA-compound-8	0.365409
mosapride	0.364305
AZD-7762	0.364184
kenpaullone	0.363088
SA-247714	0.362564
celastrol	0.362469
ARG-CSC-81	0.360189
TW-37	0.35757
auranofin	0.356938
BMS-754807	0.356811
deforolimus	0.356729
parthenolide-(alternate-stereo)	0.356708
BRD-K68313733	0.356434
tozasertib	0.356303
palbociclib	0.356155
IKK-16	0.355876
WZ-4-145	0.353224
alvespimycin	0.352157
ruxolitinib	0.352002
AC-55649	0.351899
rucaparib	0.350193
thiostrepton	0.350177
ARP-101	0.349752
pitavastatin	0.348882
AS-605240	0.348308
JLK-6	0.345593
PU-H71	0.343907
thiothixene	0.343203
XMD-1185H	0.34216
GDC-0941	0.340955
MST-312	0.340588
BRD-U86222656	0.339921
AKT-inhibitor-IV	0.339899
BRD-K55722623	0.339625
SA-423131	0.339446
BRD-K14788918	0.339192
BRD-K53638321	0.339016
PJ-34	0.338994
BRD-A60386802	0.33871
CD-437	0.338701
CGK-733	0.338074
BRD-K28774715	0.337057
ABT-751	0.336589
BRD-K52321331	0.335979
BRD-K36354764	0.33528
CAY-10618	0.33482
BRD-K37043259	0.334422
BRD-K28916077	0.333948
THZ-2-98-01	0.332883
tyrphostin-AG-1478	0.332772
rilmenidine	0.332504
BRD-K72451865	0.329413
ryuvidine	0.328113
BRD-K42499654	0.325888
CGP-71683	0.325436
BRD-K49010888	0.325202
I-070759	0.324648
BRD-A37735495	0.324174
BIIB-021	0.323564
H-7	0.318866
perhexiline	0.318842
BRD-K64366758	0.317163
HLI-373	0.316935
DMeOB	0.315598
4-(2-amino-ethyl)-benzenesulfonamide	0.31471
BRD-K21064560	0.314684
elesclomol	0.314397
BRD-K48950795	0.314306
citalopram	0.313077
BRD-A61825514	0.3128
BRD-K05331696	0.311713
RHO-kinase-inhibitor-III[rockout]	0.311356
RS-17053	0.3109
cytochalasin-d	0.309281
ochratoxin-a	0.308282
BRD-K70161581	0.308105
cinalukast	0.307738
PP-1	0.307399
BRD-K61175124	0.306849
CAM-9-027-3	0.306289
quinoclamine	0.305208
KU-C104493	0.30465
ALW-II-49-7	0.303849
BRD-K44510578	0.303285
BRD-K80346834	0.302875
midostaurin	0.302803
SSR-69071	0.301769
KU-C104123	0.301663
BRD-K74486276	0.301401
isoliquiritigenin	0.301372
PATI-1-2-3	0.300629
brazilin	0.29922
WAY-170523	0.298939
BRD-K88668992	0.298802
BRD-K07061353	0.297336
ispinesib	0.296558
BRD-K18163752	0.295611
albendazole	0.295457
benzylpenicillin	0.294854
BRD-K36772364	0.294361
quinine	0.294312
BRD-K58900438	0.29376
angiogenesis-inhibitor	0.293267
BRD-K86899078	0.293077
VU-0447127-2	0.291414
acyclovir	0.291218
BRD-K71303366	0.290411
FPL-64176	0.289925
15-delta-prostaglandin-j2	0.28923
aloisine	0.289102
BRD-K55216615	0.287853
cyclosporin-a	0.287801
BRD-A94570195	0.287413
paroxetine	0.287352
XMD-1499	0.287094
BAPTA-AM	0.286434
BRD-K78062244	0.286102
raltitrexed	0.285941
ST-4029573	0.285291
BRD-K04188046	0.285016
sulforaphane	0.284751
phenoxazine	0.284459
mepacrine	0.284228
veliparib	0.283997
tyrphostin-AG-879	0.283967
tyrphostin-A9	0.283884
SA-424589	0.282501
BRD-K07005393	0.282263
afatinib	0.281922
BAS-09104376	0.281921
BRD-K74596421	0.281414
gamma-linolenic-acid	0.280751
BRD-A81282034	0.280075
UK-356618	0.279479
maraviroc	0.279186
flupirtine	0.278553
AT-SUMO-1	0.278474
BRD-A18725729	0.278429
SA-424577	0.277951
BRD-K94493764	0.277941
M2-PK-activator	0.277786
BRD-K71670746	0.277458
BRD-A98444709	0.277376
BRD-K26211296	0.277301
rolitetracycline	0.274467
amcinonide	0.274432
BRD-K82524003	0.274181
flumazenil	0.274136
evodiamine	0.27398
BRD-A41114263	0.273963
CCCP	0.273661
indirubin-3-monoxime	0.273453
BRD-A49581300	0.273297
BRD-K60067222	0.273239
pifithrin-mu	0.272797
BRD-A18411371	0.272591
BRD-K99633092	0.272493
ezetimibe	0.272249
BRD-K65955264	0.272213
BRD-K05684908	0.271907
BRD-K14328427	0.27158
probenecid	0.270981
BRD-K55116708	0.270839
ST-91	0.270533
BRD-K35716340	0.270524
triacsin-c	0.270447
flavokavain-b	0.269334
5-nonyloxytryptamine	0.269221
BRD-K85818861	0.269208
mycophenolic-acid	0.268512
BRD-K19166598	0.26534
MLN-8054	0.264789
BRD-A26595446	0.263557
BRD-A70311631	0.263266
PP-2	0.263187
BRD-K70693222	0.26226
sappanone-a	0.262068
rottlerin	0.261973
phenethyl-isothiocyanate	0.261286
PT-630	0.261274
GSK-1904529A	0.261229
BRD-K43806450	0.261036
KU-C104486	0.260563
wortmannin	0.260482
BRD-K94390040	0.260354
meloxicam	0.260272
BRD-K03358980	0.260081
mebendazole	0.259646
manumycin-a	0.258997
SA-3676	0.258868
BRD-K38625260	0.258726
suloctidil	0.25844
BRD-A25170757	0.257165
SIB-1893	0.256984
BRD-K15107389	0.255961
BRD-K00007652	0.255834
BRD-A70591769	0.255747
BRD-K24053449	0.255377
QS-11	0.255011
BRD-A75301702	0.25344
BRD-K78206606	0.253354
neurodazine	0.252912
BRD-K20914082	0.252782
BRD-K52914903	0.252393
BRD-K89451433	0.251999
BRD-K23282736	0.25136
EMF-sumo1-2	0.251041
GW-843682X	0.251037
ON-01910	0.250923
terfenadine	0.250122
DC-45-A2	0.249514
BRD-K14939371	0.249183
BRD-K58141791	0.248991
BRD-K58288048	0.24863
BRD-K56593336	0.248549
irinotecan	0.248105
BRD-K82092559	0.247937
BRD-K51377689	0.247826
mafenide	0.247652
canertinib	0.246682
BRD-K43131268	0.246463
mianserin	0.246301
U-0126	0.245991
U0126	0.245407
valproic-acid	0.245255
BMS-299897	0.244814
BRD-K80786583	0.24453
SA-247384	0.243029
BRD-K84762162	0.242953
BRD-K06405410	0.242903
STO-609	0.242764
BRD-K26048285	0.242096
oligomycin-a	0.241252
mevastatin	0.241132
BG-FA-0953	0.240984
BRD-K62818989	0.240732
SPB02303	0.239918
SKI-II	0.239405
vemurafenib	0.239367
SA-425500	0.239289
SKF-86002	0.238278
farnesol	0.238212
BRD-K31453413	0.237854
bosutinib	0.237161
AG-957	0.237014
IKK-2-inhibitor	0.236864
BRD-K53327986	0.236729
BRD-K18861610	0.236539
niguldipine	0.236378
syrosingopine	0.236244
EI-231	0.235084
MW-STK33-2A	0.234864
BRD-K18059480	0.234621
BRD-K76236182	0.233937
erlotinib	0.232696
TWS-119	0.232408
BRD-K62768020	0.232126
bithionol	0.231832
BRD-K34974324	0.231739
BRD-K51083659	0.23133
BRD-K86027709	0.231157
menadione	0.230695
ICI-89406	0.230612
capsazepine	0.230492
KU-C104223	0.230433
BRD-A96272097	0.229889
nonoxynol-9	0.229871
BRD-K84450674	0.229583
NPK76-II-72-1	0.229486
ubenimex	0.228312
anabasine	0.228293
BRD-K35638681	0.228058
PD-198306	0.227092
XL-147	0.227046
KM-03949SC	0.22617
AG-592	0.22613
BRD-K37124285	0.22612
NNC-55-0396	0.226043
BRD-K60297835	0.226041
BRD-A94297859	0.22585
SA-103006	0.225778
BRD-K50521229	0.225444
sulpiride	0.224853
BRD-K55536701	0.224524
KIN001-127	0.224287
BRD-K76938712	0.224255
BRD-K69516039	0.223593
ergocornine	0.223404
ST-4028268	0.223118
BRD-K67090983	0.222886
BRD-A42737819	0.222864
STK-249718	0.222528
olmesartan-medoxomil	0.222281
thioridazine	0.222183
BRD-K91517665	0.222174
BRD-K55844427	0.221634
mirin	0.221625
BRD-A68061604	0.220141
nocodazole	0.219365
BRD-K48803730	0.218966
TL-HRAS-61	0.218956
XMD-132	0.218261
lasalocid	0.218017
BRD-K51998148	0.218011
danusertib	0.218005
BRD-A41997916	0.217732
MW-STK33-1A	0.21748
BRD-K51155404	0.217122
BRD-K63239300	0.216645
UNC-0321	0.21659
BRD-K52801121	0.216391
dephostatin	0.21605
JZL-184	0.214914
BRD-K04695623	0.214863
BRD-K99381377	0.214847
BRD-K09191212	0.21457
LY-303511	0.214335
L-ascorbyl-6-palmitate	0.214178
BRD-K05197617	0.21408
bifemelane	0.214039
BRD-K53592093	0.213908
BRD-K37127624	0.213906
BRD-K65404805	0.213743
ivermectin	0.21374
chloroquine	0.213614
FTI-276	0.2128
phenolphthalein	0.212549
BRD-K91184774	0.212068
BRD-K82196068	0.212022
tremulacin	0.211675
nicergoline	0.211623
BRD-K42489623	0.210856
BRD-A69429454	0.210634
BRD-K59556282	0.210585
ML-167	0.210252
L-690330	0.210165
BRD-K60070073	0.20988
clofarabine	0.209858
WR-216174	0.209841
BRD-K46869836	0.209807
cholic-acid	0.209186
BRD-K99502566	0.208919
navitoclax	0.208597
cladribine	0.20832
BRD-A81936046	0.208076
KB-R7943	0.207875
ST-4034917	0.207202
WZ-3146	0.207196
BRD-K25144184	0.20692
CGS-15943	0.206795
HG-6-64-01	0.206615
tyrphostin-AG-112	0.206508
BRD-K30511626	0.206129
tibolone	0.206053
AZ-628	0.205745
BRD-K59019422	0.205652
hinokitiol	0.205582
NF-449	0.205551
L-745870	0.205436
hyperforin	0.204987
BRD-K56477805	0.204864
BRD-K09460252	0.204793
endo-IWR-1	0.204641
BRD-K58618158	0.204262
AS-703026	0.204216
BRD-A13461302	0.203762
BRD-K21822525	0.203555
BRD-K86682249	0.203506
carbetocin	0.203258
protein-tyrosine-phosphatase-inhibitor-IV	0.20304
nortriptyline	0.202976
BRD-K73125384	0.202934
plinabulin	0.202097
mycophenolate-mofetil	0.201394
SA-103123	0.201174
BRD-K21482967	0.200852
MDL-29951	0.200666
geldanamycin	0.200331
EI-273	0.200149
palonosetron	0.199892
BRD-K79779816	0.199718
trifluoperazine	0.199708
BRD-K47917680	0.199565
BRD-K45582470	0.199543
tramadol	0.199498
TAK-715	0.199374
BRD-K71726959	0.199326
RAN-29	0.198879
BRD-K47764688	0.198413
BRD-K34412705	0.198258
BRD-K93578426	0.198099
SB-431542	0.197946
BRD-K28112517	0.197796
ALW-II-38-3	0.197746
JAK3-inhibitor-V	0.197489
EI-346-erlotinib-analog	0.197003
RITA	0.196646
diflorasone	0.196487
BRD-K17025677	0.19636
BRD-K89843224	0.19628
quercetin	0.196223
BRD-K57309821	0.195784
MW-A1-12	0.195657
amlodipine	0.195603
SB-415286	0.19559
BIBX-1382	0.195501
BRD-K23027438	0.195197
VER-155008	0.194465
cediranib	0.194239
saracatinib	0.19391
BRD-K46373671	0.193443
RJC-00245SC	0.193287
BRD-K85266146	0.192911
NSC-663284	0.192898
L-368899	0.192789
QX-314	0.192512
PSB-069	0.191846
BRD-A59145032	0.191616
BRD-K01834163	0.191056
BRD-K65242613	0.19099
BRD-K67258146	0.190843
TTNPB	0.190826
SB-225002	0.190719
BRD-A16820783	0.190467
DUP-697	0.190067
HG-5-88-01	0.190055
CCT-018159	0.19003
cyproheptadine	0.18975
AICA-ribonucleotide	0.189586
iodophenpropit	0.189583
glipizide	0.18909
KU-C104248	0.188896
gatifloxacin	0.188873
VU-0415533-1	0.188614
prima-1-met	0.188352
BRD-K77480336	0.188153
BRD-K31260488	0.187874
BRD-K13277629	0.187622
BRD-K55612480	0.187578
BRD-A57300602	0.187532
BRD-K79131428	0.187297
BRD-K31856043	0.186721
balsalazide	0.186534
BRD-K98404142	0.18647
ZK-93423	0.186363
SB-525334	0.186348
thapsigargin	0.186346
KU-C104226	0.18574
wiskostatin	0.185622
nomegestrol-acetate	0.185601
promazine	0.185109
BRD-K23657553	0.18505
SA-247615	0.1841
BRD-K41925105	0.183624
BRD-K53501402	0.183609
cytochalasin-b	0.183502
SB-202190	0.182874
BRD-K83816656	0.182401
BRD-K65904652	0.182331
T-98475	0.182117
BRD-K02598395	0.181945
BRD-K74126469	0.181269
BRD-K66902379	0.181163
PD-0325901	0.180623
KU-C104132	0.180455
BRD-K82034465	0.180078
BRD-K88735704	0.179797
tipifarnib-P2	0.179621
BRD-K99756483	0.179595
BRD-K04676863	0.179539
KF-38789	0.179452
VU-0400071-3	0.179317
VU-0365118-1	0.178941
BRD-K19181733	0.178886
hydroxycholesterol	0.178663
dasatinib	0.178537
BRD-K48036219	0.178523
BRD-A84524947	0.178501
BRD-K45205755	0.178327
CO-102862	0.17812
BRD-K96167523	0.177688
BRD-K52524742	0.177448
BRD-K18249495	0.177314
lypressin	0.177304
triflupromazine	0.177024
BRD-K92981876	0.176068
BRD-K57457519	0.175963
ST-001903	0.175739
LY-2183240	0.175544
EMF-sumo1-8	0.175058
apigenin	0.174952
CGP-57380	0.17436
butein	0.174307
GSK-461364	0.174272
penfluridol	0.174133
ST-014075	0.174095
prostaglandin	0.173899
BRD-A00474148	0.17389
alrestatin	0.173802
sertraline	0.173795
BRD-K73945663	0.173458
ricinine	0.17319
fasudil	0.173166
BRD-K32568627	0.173086
RLM-2-12	0.172212
BRD-K59460069	0.172141
BRD-K25884242	0.172136
colforsin	0.171338
tivozanib	0.171213
aprepitant	0.171148
BRD-A30083233	0.170794
BRD-K96147838	0.170692
IC-261	0.170608
BRD-K57037351	0.170108
BRD-K70974948	0.169795
BRD-K81807412	0.169768
ST-4042556	0.16971
BRD-K64970062	0.16963
desoxypeganine	0.169091
potassium-canrenoate	0.168933
farnesylthioacetic-acid	0.168853
BRD-K38698447	0.168778
BRD-K99582188	0.168653
bongkrek-acid	0.168472
xanthohumol	0.168373
GW-311616	0.168127
BRD-A32449311	0.168064
BAY-11-7082	0.167959
BRD-K34092011	0.167901
BRD-K70714754	0.167542
BRD-K32927008	0.167539
GANT-61	0.16713
chlorpromazine	0.166894
aurora-a-inhibitor-i	0.166728
BRD-K23774426	0.166554
BRD-K68038686	0.166264
simvastatin	0.166257
arctigenin	0.165966
icilin	0.165931
rimcazole	0.165896
H-8	0.165864
linsitinib	0.165646
BRD-K68007270	0.165606
XMD-1527	0.165562
SD-6-035-A7	0.165483
nicotinyl-alcohol-tartrate	0.165372
BRD-K43226598	0.165256
imiquimod	0.165123
BRD-K83620635	0.164648
ABT-737	0.164623
BRD-K05520923	0.164354
reversine	0.16431
IAA-94	0.164168
BRD-K27290412	0.164089
HA-1004	0.164087
KU-C103671	0.16376
BRD-A83706824	0.163492
selamectin	0.163385
RG-14620	0.163341
BRD-K71915010	0.163321
BRD-K54168141	0.163122
BRD-K51608872	0.162983
fatostatin	0.162639
BRD-K24346336	0.162418
SB-269970	0.162212
BRD-K72817452	0.161813
BRD-K30064966	0.161223
BRD-K39829853	0.160996
withaferin-a	0.160679
BRD-K56855930	0.160492
synephrine	0.160439
EMF-sumo1-3	0.160239
BRD-K78189262	0.160163
BRD-K98834634	0.16008
nobiletin	0.160035
BRD-K04156788	0.159832
LY-364947	0.159801
BRD-A11095214	0.159695
NNC-05-2090	0.159689
vesamicol	0.159478
BRD-K87426499	0.15947
eriochrome-black-t	0.159335
BRD-K33619512	0.159276
BRD-K25784575	0.158901
resorcinol	0.158776
BRD-A09984573	0.158478
cytosporone-b	0.15834
myriocin	0.158183
docosatrienoic-acid	0.157942
tipifarnib	0.157828
tosyl-phenylalanyl-chloromethyl-ketone	0.157421
BRD-K43581698	0.157408
BRD-K99423120	0.15733
AG-370	0.157008
BRD-K66448556	0.156897
BRD-K52341396	0.156524
HTMT	0.155746
ARG-CSC-26	0.155675
BRD-A47832959	0.155274
propranolol	0.155254
terreic-acid-(-)	0.155153
vincamine	0.154818
thenoyltrifluoroacetone	0.154716
GANT-58	0.154663
BRD-K87040771	0.154134
SKF-96365	0.154025
BRD-K01121114	0.153939
BRD-K84874839	0.153414
BRD-K20032655	0.153151
CG-930	0.153028
BRD-K33045404	0.152813
BRD-K74840245	0.152674
BRD-K82384352	0.152662
sorafenib	0.152164
BRD-K76293260	0.152128
flufenamic-acid	0.152126
nicotinamide	0.151673
BRD-K06476055	0.151515
BRD-K10114046	0.151313
cilomilast	0.151107
maprotiline	0.15104
BL-050	0.150952
betahistine	0.15063
pimozide	0.150563
JTE-907	0.150493
BRD-K72462751	0.150368
BRD-K88714443	0.150351
MW-RAS9	0.150261
GW-405833	0.150173
BRD-K74690444	0.15009
cyclopamine	0.149914
alitretinoin	0.149779
devazepide	0.149746
BRD-K62970326	0.14973
BRD-K06311439	0.14968
perphenazine	0.149333
BRD-K50204028	0.149239
BRD-K99750259	0.149049
sonidegib	0.149034
BRD-K57678861	0.149014
BRD-K55827386	0.148438
BRD-K31600199	0.148
BRD-A73747855	0.147949
BRD-K25979535	0.147739
orantinib	0.147407
BRD-K69021489	0.147385
lenalidomide	0.147306
deoxycholic-acid	0.146845
barasertib-HQPA	0.146654
BRD-K59139557	0.146647
U-74389F	0.146601
BRD-K38594532	0.146402
BRD-K59754458	0.146193
temozolomide	0.145793
BRD-K73315009	0.145713
mibefradil	0.145316
BRD-K50280607	0.145138
oxalomalic-acid	0.144881
KU-C103867	0.144831
paclitaxel	0.144641
BRD-K74606027	0.144526
BRD-K54405293	0.144465
fenbendazole	0.144353
naringenin	0.144338
zebularine	0.143998
BRD-K94987138	0.143657
BRD-K89784888	0.143282
dovitinib	0.143242
tandutinib	0.143198
BRD-K11072542	0.143107
herniarin	0.142802
BRD-K65983740	0.142752
BRD-K69676861	0.142517
BRD-K79381128	0.142399
BRD-A85712510	0.142187
dexamethasone	0.142172
BRD-K63399564	0.142164
BRD-K55034844	0.142093
AGK-2	0.141892
BRD-K91047982	0.141479
BRD-K06555716	0.141032
NU-7026	0.140764
BRD-K42419294	0.140725
KU-C103658	0.14069
XAV-939	0.140658
BRD-K05452595	0.140637
BRD-K43913647	0.140613
BRD-K39187410	0.140576
BRD-K22449070	0.14036
esculin	0.140107
BRD-K93215584	0.139881
domperidone	0.139863
BRD-K00429057	0.139792
tyrphostin-AG-527	0.139774
Y-134	0.139446
BRD-A24054354	0.139428
BRD-K02735834	0.139311
rosmarinic-acid	0.139199
BRD-K14340219	0.139185
enzastaurin	0.138813
PD-173074	0.138749
BRD-K81300454	0.138657
BRD-K84571636	0.138521
SB-218795	0.138482
K784-3391	0.137415
betamethasone	0.137345
rotenonic-acid	0.137336
BRD-K09922072	0.137273
BRD-K47731572	0.137161
lithocholic-acid	0.137136
MY-5445	0.137093
ST-4070169	0.137072
YM-298198	0.137039
vinorelbine	0.137023
capecitabine	0.137009
BRD-K17754811	0.136974
BRD-K12182524	0.136901
BRD-A82628254	0.136792
forskolin	0.136577
BRD-K40846327	0.13656
BRD-K07877311	0.136494
BRD-K19922318	0.136435
BRD-K74155249	0.136334
ARG-CSC-91	0.13615
nafcillin	0.135846
BRD-K08451418	0.13563
Broad-Sai-071	0.135522
BRD-K58628167	0.135394
BRD-K71917235	0.135392
BRD-K03122949	0.135053
BRD-K98739056	0.135018
BRD-K77987635	0.135005
BRD-A86792397	0.134913
pioglitazone	0.134858
NM-PP1	0.134697
diphenyleneiodonium	0.134443
masitinib	0.134418
norgestimate	0.134365
BRD-K10855750	0.134277
BRD-K41240505	0.134259
GW-7647	0.134009
retinol	0.134001
BRD-A05565054	0.133979
fluoxetine	0.133877
tyrphostin-AG-1288	0.133789
BRD-K64024097	0.133662
TUL-XX023	0.133503
atorvastatin	0.133332
STK-064652	0.13327
BRD-K25719068	0.133217
isorotenone	0.132624
BRD-K74931283	0.132585
ZD-7155	0.132347
sinensetin	0.132334
HA-14-1	0.132262
BRD-K55071917	0.13223
BRD-K49553303	0.132194
KU-C104133	0.132148
estradiol-cypionate	0.132137
BRD-K84803513	0.132012
LE-135	0.131908
epothilone-a	0.131812
CGP-53353	0.13162
PD-98059	0.131618
BRD-K76691125	0.131573
L-733060	0.131435
KUC103423N	0.131287
BRD-K80962769	0.131097
ebelactone-b	0.130988
PTB1	0.130878
NTNCB	0.130736
BRD-K74447990	0.130709
BRD-K98634983	0.130694
BRD-K12623437	0.1306
TCPOBOP	0.130502
BRD-K13580623	0.130402
BRD-K18364651	0.130179
BRD-K78524708	0.1301
prostaglandin-a1	0.12999
geranylgeraniol	0.129975
BRD-K97522823	0.129973
BRD-K84421793	0.129814
D-64131	0.12981
BAY-K-8644-(S)-(-)	0.129592
BRD-A06909528	0.129397
BRD-K88511582	0.129386
carvedilol	0.129324
BRD-K02175743	0.129273
BRD-K79459005	0.129259
BRD-K60757524	0.129042
BRD-K64979116	0.128831
JAK3-inhibitor-I	0.12863
BRD-K35024477	0.128476
SD-6-035-A3	0.128389
enrofloxacin	0.128381
4-hydroxyretinoic-acid	0.128251
BRD-K73951926	0.128147
BRD-K96194181	0.128088
KUC103903N	0.127863
SU-4312	0.127764
BRD-K27630390	0.127735
BRD-K53461563	0.127478
KM-01366	0.127372
BRD-K07079548	0.127339
BRD-K22384978	0.12728
U-18666A	0.127261
zosuquidar	0.127248
MDM2-inhibitor	0.127108
BRD-K33164466	0.127013
BRD-K98546361	0.126779
BRD-K29160485	0.126704
BRD-K23217072	0.126587
BRD-K75418381	0.126334
BRD-K16057611	0.126316
BRD-K86905031	0.126253
SA-89068	0.125987
BRD-K06071925	0.125955
BRD-K00442147	0.125902
guggulsterone	0.125821
BRD-K08174547	0.125617
SU-1498	0.125465
altrenogest	0.125254
D-64406	0.124862
BRD-K51189903	0.124392
MEK1-2-inhibitor	0.124386
SNS-314	0.124015
SEW-00445	0.123971
troglitazone	0.123932
RS-39604	0.123292
S-206352	0.123282
L-755507	0.12321
BRD-K75296800	0.123029
isoflupredone-acetate	0.122676
BRD-K90996982	0.122624
oxibendazole	0.122457
caffeic-acid	0.122285
PSH-022	0.122013
5-methoxytryptamine	0.121894
BRD-K16541732	0.121863
BRD-K96704648	0.121748
BRD-K92489476	0.121647
BRD-K58519325	0.121496
pirinixic-acid	0.121038
K-858	0.121013
ST-4029010	0.12097
cinacalcet	0.120964
BRD-K45763312	0.120869
TGX-221	0.120862
vinblastine	0.120814
BRD-K90970920	0.120768
BRD-K07161233	0.120716
BRD-K55557659	0.120716
fluvoxamine	0.120715
BRD-K83691318	0.120423
benazepril	0.120267
BRD-K14636731	0.119621
MDL-72832	0.119613
piceatannol	0.119611
EMF-csc-9	0.119551
KU-C104228	0.119341
nicardipine	0.119315
SD-6-035-A9	0.119254
MDL-28170	0.118937
KU-C103869	0.118898
BRD-K82747512	0.118488
BRD-A36059655	0.118374
BRD-K06592610	0.118339
SC-68376	0.118299
NNC-711	0.117901
BRD-K30802967	0.117745
terguride	0.117642
BRD-K82594686	0.117593
PSB-06126	0.117558
BRD-K74623475	0.117435
PCA-4248	0.117193
DY-131	0.116917
BRD-K53610452	0.116848
KU-C103655	0.116777
docetaxel	0.116655
ARG-A1-22	0.116451
BRD-K86901264	0.116421
BRD-A82197375	0.116277
BRD-K47147974	0.11621
GW-441756	0.116185
SD-6-035-B3	0.11609
BRD-K25774147	0.116005
BRD-K91028164	0.115805
BRD-K58479490	0.115738
BRD-K44978960	0.115725
hemado	0.1156
AR-C133057XX	0.115455
ARG-CSC-18	0.115422
Ro-90-7501	0.115136
BRD-K10143126	0.115035
BRD-K00028814	0.114951
BRD-K02502363	0.114697
RAN-14B	0.114611
veratridine	0.114568
BRD-K44781077	0.114544
butoconazole	0.114477
methantheline	0.114345
floxuridine	0.114099
PQ-401	0.114059
KU-C103420N	0.113725
BRD-K23582869	0.113546
eriodictyol	0.113483
BRD-K67778494	0.113129
BRD-K28680267	0.113005
cyclopiazonic-acid	0.112955
BRD-K19593010	0.112838
BRD-K43267173	0.112775
BRL-50481	0.11267
BRD-K99465084	0.112585
EO-1428	0.112293
decafluorobutane	0.112056
KM-00519SC	0.112017
UGISS-451	0.111976
lopinavir	0.111843
methocarbamol	0.111808
BRD-K59794046	0.111744
YC-1	0.111736
BRD-K17773477	0.111572
BRD-K74189021	0.111557
SD-8-006	0.111366
leucodin	0.11125
BRD-K16046246	0.111157
BRD-K28789065	0.110395
BRD-K54331210	0.110367
BRD-K41668190	0.110308
depudecin	0.110279
mometasone	0.110107
anagrelide	0.110022
ST-208960	0.109978
LE-300	0.109935
BRD-K03651937	0.109916
clofibric-acid	0.109751
tyrphostin-AG-555	0.109169
DMBI	0.109109
beclomethasone-dipropionate	0.109063
BRD-A93507363	0.109039
OBAA	0.108963
carbidopa	0.108953
phentermine	0.108917
securinine	0.108729
I-070754	0.108667
SD-6-035-A2	0.108577
rolipram	0.108442
BRD-K00289828	0.108295
BRD-K52446745	0.108105
ICI-162846	0.108056
diethylcarbamazine	0.108024
BRD-K58347372	0.107753
PLX-4720	0.10766
L-741626	0.107564
KU-C103898N	0.107456
alfadolone-acetate	0.107388
cuneatin	0.107017
H-89	0.106948
BRD-K81249836	0.106846
papaverine	0.106832
naftidrofuryl	0.106801
BRD-K70369221	0.106797
cisapride	0.10675
BRD-K08463963	0.106683
BRD-K42541148	0.106486
BRD-K39921295	0.10645
BRD-A56800788	0.106269
tetramethylsilane	0.106165
fludroxycortide	0.106104
BRD-K36817836	0.106037
cyclopentolate	0.105843
BRD-K70771662	0.105804
BRD-K36317223	0.105604
rescinnamine	0.105398
BRD-K86846944	0.105317
BRD-K75641083	0.105291
mepyramine	0.105279
baccatin-III	0.105241
SD-6-035-B4	0.105209
PPT	0.105017
KU-C104230	0.104967
felodipine	0.104879
ticlopidine	0.104772
rhamnetin	0.10473
BRD-K41931739	0.104709
ST-209453	0.104665
KIN001-244	0.104625
VU-0011562	0.104616
AR-A014418	0.104616
BRD-K67519589	0.104442
BRD-K49861754	0.104411
altanserin	0.104055
ST-022313	0.103981
BRD-K76612204	0.10397
BRD-K32101742	0.10387
BRD-K58784778	0.103857
BRD-K85694079	0.103592
EMF-sumo1-12	0.103524
TG-100115	0.103459
dexchlorpheniramine	0.103418
ST-014147	0.10341
etamivan	0.103306
SB-216641	0.103185
BRD-K99135512	0.103006
BRD-K86492010	0.10294
ponalrestat	0.102915
STOCK1S-03920	0.102902
BRD-A39599596	0.102755
L-701252	0.102585
BRD-K36895979	0.102565
chlorphenamine	0.10254
KUC104547N	0.102447
PIT	0.102244
BRD-K08799950	0.101893
DAU-5884	0.101881
cefdinir	0.101808
BRD-K86108784	0.101734
trimipramine	0.101727
BRD-K93296644	0.1017
BRD-A07614565	0.101486
azithromycin	0.10144
BRD-K23978082	0.101321
KM-03472SC	0.101249
AY-9944	0.101237
BRD-K10649245	0.10114
BRD-K41845021	0.101113
BRD-A06276885	0.101107
ropinirole	0.101033
epoxycholesterol	0.100958
ST-019366	0.100876
coumestrol	0.100754
BRD-K44575778	0.10057
BRD-K70086257	0.100512
BRD-A13914662	0.100186
PD-102807	0.0997586
cyclo-[Arg-Gly-Asp-D-Phe-Val]	0.0996557
BRD-K09716788	0.0996047
rhizocarpic-acid	0.0996032
BRD-K46692335	0.099589
naltriben	0.0995201
BRD-K27539181	0.0994464
chloroxine	0.0994062
beclometasone	0.0994
tetrahydropalmatine	0.0993251
BRD-K87730440	0.0991187
BRD-K54657957	0.0985366
BRD-K66908362	0.0984846
ZM-447439	0.0984242
BRD-K42644990	0.0984028
gefitinib	0.0980652
SDM-25N	0.0980221
FR-180204	0.0980066
indolophenanthridine	0.0978908
BRD-K12393722	0.0978572
BRD-K67470788	0.0978539
BRD-K54674054	0.0978363
eicosatetraynoic-acid	0.0978309
BRD-K73334721	0.0977392
BRD-K31754360	0.0977101
BRD-A32214171	0.0976532
tyrphostin-AG-494	0.097533
raltegravir	0.0975326
UBP-302	0.0974264
BRD-K51126483	0.0973297
fraxidin	0.0972493
GR-113808	0.0972452
BRD-K01800709	0.0972279
reserpine	0.0972092
osthol	0.0971947
BRD-K76846644	0.0971918
WZ-7043	0.097089
BRD-A19928752	0.0970666
BRD-K48204702	0.0970241
BRD-K82206012	0.0969955
SB-590885	0.0969132
BRD-K46532897	0.0968496
KU-C104227	0.0968379
tetramisole	0.0967647
betamethasone-acetate	0.0967414
BRD-K25608435	0.0965316
ARG-CSC-22	0.0963577
BRD-K18749194	0.0962044
luzindole	0.0960599
BRD-K84106030	0.0959881
BRD-K31887147	0.0958096
SA-422830	0.0956404
naphazoline	0.0955619
tracazolate	0.0955423
fexaramine	0.0954484
BRD-K62019540	0.0953772
amperozide	0.0953644
BRD-K57019930	0.0953343
BRD-K41284916	0.095302
BML-190	0.0952507
TH02453-036-P1	0.0950059
BRD-K53214709	0.0949929
BRD-K14270862	0.0949583
CGP-52432	0.0948657
BRD-K40955748	0.0948094
BRD-K64754843	0.094767
lawsone	0.094756
teicoplanin	0.0947152
BRD-K63979920	0.0946643
BRD-K73285375	0.0942886
SRT-1720	0.0942661
gitoxigenin	0.0942623
BRD-K81609421	0.0942004
BRD-K37549600	0.0940966
BRD-K69231968	0.0940766
fluvastatin	0.0940525
SPB02137	0.0940309
PD-184352	0.093974
GW-1929	0.0939624
CFM-1571	0.0937563
N-(3-acetamidophenyl)-3-chlorobenzamide	0.0937482
nialamide	0.0936926
GR-159897	0.0935081
FIT	0.093431
BRD-K59840856	0.0933149
BRD-K94544211	0.0932396
rutin	0.0932306
cirazoline	0.0932213
KU-C104502N	0.0929579
BRD-K65742362	0.0928459
BRD-K38455110	0.0926985
epicatechin-gallate-(-)	0.0925521
tebuthiuron	0.0923672
CL-218872	0.0921074
mebeverine	0.0920949
BRD-K33586157	0.092038
acitretin	0.0919186
BRD-K30523950	0.0919092
BRD-K33116223	0.0917956
isotretinoin	0.0917399
eugenitol	0.0917102
BRD-K07452532	0.0917023
BRD-K99146421	0.0916334
BRD-K73481389	0.0916233
BRD-K98519396	0.0916113
BRD-K59705555	0.0914199
imatinib	0.0912731
BRD-K55630727	0.0912386
SQ-22536	0.0911435
BRD-A74608937	0.0910653
BRD-K28377013	0.0909211
salsolinol	0.0908842
nizatidine	0.0908514
DAPT-GSI-IX	0.0906971
thiotepa	0.0906955
gabazine	0.0904918
BRD-K80094086	0.0902377
darinaparsin	0.0900294
BRD-A61189834	0.0899835
BRD-K88008216	0.0899336
BRD-K37340241	0.0898909
arcyriaflavin-a	0.0898137
BRD-K38599483	0.0898016
BRD-K61921568	0.0896701
BRD-A95944315	0.0895881
CGP-13501	0.0893219
BRD-K00430421	0.0892859
scoulerine	0.0892657
BRD-K58191509	0.089237
KU-C104122	0.0891461
mephentermine	0.0888025
BRD-K39757396	0.0887805
BRD-K44540157	0.0887408
BRD-K77239206	0.0885359
BRD-A95937159	0.0885342
BRD-A60784279	0.0884574
VU-0447134-2	0.0884272
SA-423167	0.0881824
BRD-K37932103	0.0881694
VU-0366968	0.088021
BRD-K35961280	0.0879366
SA-102096	0.0876503
doxapram	0.087606
ribavirin	0.0875454
BRD-A62647958	0.0875304
BRD-K09902564	0.0875072
BRD-K02920722	0.0874703
BRD-K45256078	0.0874155
MW-MITF9	0.0873836
BRD-K91836367	0.0873362
SDZ-21009	0.0871773
verteporfin	0.0871048
KN-62	0.087066
carmoxirole	0.0870399
fluprostenol	0.0869703
prednisone	0.0869294
CL-82198	0.0868152
lisuride	0.0866324
BRD-K66909449	0.0866106
BRD-K21005091	0.0865138
prednisolone-acetate	0.0864562
BRD-K77762110	0.0864478
resveratrol	0.0864212
triclosan	0.0863058
taurodeoxycholic-acid	0.0861863
BRD-A54632525	0.085958
BRD-A89494828	0.0858908
NSC-693868	0.0858535
buthionine-sulfoximine	0.0857845
BRD-A68721828	0.0857268
BRD-K42006476	0.0856994
BRD-K74561903	0.0853724
halcinonide	0.0852312
PRE-084	0.0852294
BRD-K63938928	0.0852165
BRD-K48716658	0.0851044
BRD-K69159985	0.085092
BRD-K74980345	0.0850618
SD-6-035-A6	0.0850441
BRD-K58674774	0.0849925
SB-239063	0.0849262
BRD-A94567954	0.0848045
BRD-A29721261	0.084633
BRD-K14395638	0.0846082
BRD-K12105018	0.0846053
BRD-A93015352	0.0845886
GW-9662	0.0845402
dantron	0.0844125
diethylstilbestrol	0.084343
tyrphostin-B44	0.0842654
oxindole-I	0.0842451
BRD-K64304398	0.0841193
cefotiam	0.0840674
FR-122047	0.083948
cefixime	0.0839191
naltrindole	0.0838889
corticosterone	0.0838038
CP-55940	0.0837984
metergoline	0.0836796
BRD-K25094947	0.0836457
quetiapine	0.0835931
meclizine	0.0835031
BRD-K40300908	0.0834286
BRD-K67742177	0.0833514
BRD-K44484254	0.0833218
pseudoephedrine	0.0831984
BRD-K63801873	0.082491
BRD-A43087975	0.0824361
1-benzylimidazole	0.0823295
17-hydroxyprogesterone-caproate	0.082322
acetyl-geranygeranyl-cysteine	0.0823017
BRD-K21786893	0.0821118
BRD-A90643929	0.0820275
ICI-199441	0.0819231
SD-6-035-A8	0.0818646
L-161982	0.0817467
BRD-K76357752	0.0816064
BRD-K24426149	0.0812665
cetirizine	0.0812651
ivachtin	0.0812078
erythromycin-estolate	0.0811827
BRD-K23103632	0.0810923
BRD-K91134378	0.0810912
FK-888	0.0810341
NS-1619	0.0806084
androstenedione	0.0805909
BRD-A71339955	0.0805701
entecavir	0.0805433
BRD-K61359235	0.0803928
RHC-80267	0.0801982
BRD-K93302072	0.0801829
BRD-K35429092	0.0801199
BRD-K06432680	0.0798413
granisetron	0.0796847
SA-84512	0.0796208
BRD-K61192129	0.0795954
BRD-K76951091	0.0794565
proxymetacaine	0.0792956
arachidonamide	0.0792906
goserelin	0.0792322
STK-661558	0.07918
SA-424936	0.0791766
donepezil	0.0791497
KI-8751	0.0791057
thiorphan	0.0789976
ZK-93426	0.0789783
PHA-665752	0.0789614
KU-55933	0.0789535
BRD-K64099269	0.0789424
BRD-K52640952	0.0788351
TC-2559	0.0788227
tubacin	0.0788209
verapamil	0.0787994
tiabendazole	0.078773
brompheniramine	0.078679
sertaconazole	0.0786345
chlorambucil	0.0785194
proguanil	0.0783676
hesperidin	0.0783017
BRD-A12643502	0.0781081
maackiain	0.0780325
GDC-0879	0.0779324
GNF-2	0.0778601
BRD-K60932973	0.0778507
BRD-K71138616	0.0778218
Ro-60-0175	0.0778134
BRD-K78167523	0.0777979
BRD-K30715099	0.0777889
RS-100329	0.07774
BRD-K59946561	0.0775358
fenoterol	0.0774755
noscapine	0.0773642
KU-C104255	0.0773428
BRD-K37323001	0.0772553
dicycloverine	0.077233
BRD-K75477256	0.0772049
BRD-K67808578	0.0771998
bulleyaconitine-a	0.0770661
BRD-K58698715	0.0770467
BRD-K70508482	0.0768947
lidocaine	0.0768524
BRD-K08887444	0.0768295
BRD-K74271701	0.0767324
GW-6471	0.0766753
oleoylethanolamide	0.0766003
BRD-A68274214	0.07657
R-96544	0.0763677
BRD-K16180117	0.0762465
BRD-K81397638	0.076133
amitriptyline	0.0760752
MRS-1845	0.0760695
BRD-A21812217	0.0760209
BRD-A13346522	0.075962
BRD-K46558254	0.0758378
BRD-K06623064	0.0757965
CGP-7930	0.0757622
BRD-K93331292	0.0757408
arecaidine-propargyl-ester	0.0757117
GSK-0660	0.0756215
ondansetron	0.0755037
BRD-K14975149	0.075499
BRD-K95673125	0.0754028
fillalbin	0.0753095
BI-78D3	0.075268
BRD-K39289507	0.0752073
BRD-K89005359	0.0751449
phosphodiesterase-V-inhibitor-II	0.0751277
BRD-A24225650	0.0751255
palmitoylethanolamide	0.0750971
BRD-K77014406	0.0749406
LY-225910	0.0748112
primaquine	0.0747191
LY-320135	0.0745237
zolmitriptan	0.074484
ZK-164015	0.0744244
axitinib	0.0743367
BRD-K90417362	0.07431
BRD-K71599932	0.0742457
BRD-K67798612	0.0742097
KB188-III-56	0.0742059
BRD-K31553917	0.0741891
fenofibrate	0.0740219
BRD-K63587518	0.0739565
tyrphostin-1	0.073938
Ro-04-5595	0.0736233
dihydroergocristine	0.0736112
buspirone	0.0735636
BRD-K37141476	0.0734937
BRD-K88059273	0.0734537
norketamine	0.0733491
BRD-K35514965	0.073294
azauridine	0.0732506
BRD-K29622226	0.0732421
EMD-386088	0.0732078
BRD-K92932331	0.0731832
BRD-K26257340	0.0731366
AG-494	0.0731298
dexketoprofen	0.073077
BRD-K07395346	0.0729944
BRD-K87387614	0.0729506
BRD-K46681113	0.0729457
BRD-A42969626	0.0728039
VU-0415374-1	0.0726331
VU-0404997-2	0.0726179
BRD-K80602561	0.0725446
BRD-K59563627	0.0725367
KU-C104142	0.0724667
GSK-429286A	0.0724228
BRD-K36490574	0.0723875
KM-04644SC	0.0723313
BRD-A55609290	0.0722694
BRD-K96083840	0.0722659
flavoxate	0.0722557
BRD-A39121618	0.072228
perindopril	0.0720906
methylprednisolone	0.0720077
GR-235	0.0717482
KU-C103882	0.0716471
BRD-A32241587	0.0716335
JX-401	0.0715281
chlordiazepoxide	0.0715118
piperidolate	0.0714825
spiperone	0.0714784
EMF-sumo1-4	0.0714698
ethambutol	0.0713976
ginsenoside	0.0713331
IB-MECA	0.0712228
BRD-K00390580	0.0711769
calpeptin	0.0711146
BRD-K49403449	0.0710844
BRD-A45657137	0.0710519
BRD-K76935234	0.0709688
KUC104542N	0.0708802
BRD-K35858371	0.0706147
KUC104240N	0.0705749
tenoxicam	0.0705512
clomifene	0.0705195
BE-2254	0.0701639
hydroquinidine	0.0699885
GP-2a	0.0699798
DH-97	0.0699234
BRD-K07872006	0.0698949
medroxyprogesterone	0.0698561
BRD-K86231656	0.0698561
doconexent	0.0698332
relcovaptan	0.0697732
SB-334867	0.0697309
BRD-K71142328	0.0694566
BRD-K94381355	0.0694196
BRD-K16925374	0.0693674
oxyphenonium	0.0693646
BRD-K28293491	0.0693128
erythromycin-ethylsuccinate	0.069155
BRD-K76073118	0.0691228
meclofenamic-acid	0.0690973
HTS-11203SC	0.068969
SD-6-035-A11	0.0689499
RK-682	0.0689311
BRD-K78844995	0.0689176
BRD-K08777248	0.0687701
sulmazole	0.0686584
BRD-K15888437	0.0684056
BRD-K68158690	0.0682895
BRD-K86565213	0.0682503
bromhexine	0.0681723
BRD-K90041947	0.0681478
BCL2-inhibitor	0.0681197
butyl-paraben	0.0679683
endecaphyllin-x	0.0679543
T-0070907	0.0678576
BRD-K65411918	0.0678342
BRD-A51929314	0.0678112
zibotentan	0.0677716
BRD-K76896292	0.0677407
BRD-K48576794	0.0677202
BRD-K62719675	0.0676556
umbelliferone	0.0676547
butabindide	0.0675231
BRD-K05672354	0.0673897
BRD-A13964793	0.0673848
BRD-K30779094	0.0673137
CI-966	0.0672526
bepridil	0.0672454
diazoxide	0.0671621
PSH-012	0.0669729
protriptyline	0.0668738
BRD-A89049230	0.066855
BRD-U32049204	0.0667282
NU-1025	0.066726
ST-019365	0.0665914
tofacitinib	0.0665661
reichstein	0.0665427
BRD-K39866321	0.0663716
SA-427543	0.0663142
BRD-K40480443	0.06601
BRD-K93899689	0.0657465
BRD-K70977695	0.0657353
ST-4029487	0.0656613
BRD-K50532160	0.0655844
Merck60	0.0655434
BRD-K19056367	0.0654815
prochlorperazine	0.0654529
BRD-K33459729	0.0653271
tyrphostin-51	0.0652205
quinelorane	0.0651865
L-692585	0.0650495
metaxalone	0.0650247
prednisolone-hemisuccinate	0.0650157
tyrphostin-AG-538	0.0649956
taurocholic-acid	0.0649158
thioproperazine	0.0648493
cabergoline	0.0647611
bendroflumethiazide	0.0647287
SD-6-035-A12	0.064642
JAS07-004	0.0646074
clemastine	0.0646063
flunisolide	0.06455
nalbuphine	0.0645432
VU-0400195-3	0.0645089
PK-11195	0.0644629
BRD-K69569876	0.0643767
ST-4066738	0.0643556
ritanserin	0.0643238
BRD-K14844937	0.0642565
BRD-K68020183	0.064176
lysergol	0.0641711
BRD-K46645809	0.0640672
BRD-K46555627	0.0639789
BML-257	0.0638783
tyrphostin-AG-556	0.0638309
pregnenolone-succinate	0.0637877
hippeastrine	0.0637584
clonidine	0.0635306
lobelanidine	0.0634308
estradiol-benzoate	0.0634056
vanoxerine	0.0633292
AMG-9810	0.0633114
purmorphamine	0.06323
GP-1a	0.0632224
emodic-acid	0.0631313
triamcinolone	0.0631173
BRD-K50360938	0.0630264
BRD-K28800414	0.0629629
BRD-K31412180	0.0625211
enobosarm	0.0625008
sphingosine	0.0622366
BIX-02188	0.0622211
BRD-K04516579	0.0622104
BRD-K76595177	0.0621662
ichthynone	0.0619766
BRD-K10906552	0.0618621
BRD-A58482795	0.0616579
BRD-K19196783	0.0616094
NSC-95397	0.0615312
hydralazine	0.0612888
BRD-K30463976	0.061263
BRD-K08438429	0.0612219
BRD-K30704475	0.0611992
BRD-K88542532	0.0611609
BRD-K27151060	0.0611441
BRD-K11778372	0.0611189
BRD-K69695287	0.0611096
morphothebaine	0.0610482
BRD-K33926001	0.0610122
BRD-K53331454	0.0609882
BRD-K46594703	0.0609781
ST-019386	0.0608801
BRD-K50177987	0.0608259
EMF-sumo1-7	0.0607926
GBR-12783	0.0607016
MW-A1-14	0.0606688
dehydrocholic-acid	0.0606629
exemestane	0.0606032
rivaroxaban	0.0605997
lavendustin-a	0.0605433
BRD-K23980805	0.060531
BRD-K64881093	0.0605306
vincristine	0.0604778
BRD-K10833576	0.0604485
BRD-A88878656	0.0604424
BRD-K45735142	0.0603764
BRD-K56983253	0.0601359
fluticasone-propionate	0.0600989
UB-165	0.0600425
digoxigenin	0.0598894
diclofenamide	0.0597624
LY-341495	0.059716
clocortolone-pivalate	0.0596926
SB-408124	0.0596248
BRD-K30804015	0.0595496
SR-57227A	0.0594891
pindolol	0.0593841
L-152804	0.0593135
RS-16566	0.0592767
embelin	0.0591541
BRD-K38634661	0.0590537
budesonide	0.0590404
RG-13022	0.0588325
benzopurpurin-4b	0.0587544
BRD-K00954209	0.0587201
BD-1063	0.0586687
larixinic-acid	0.0586424
BRD-K33606495	0.0585842
diphenidol	0.058577
BRD-K91355947	0.0585229
fluticasone	0.0581518
MRS-1220	0.0580257
BRD-K93127801	0.0578511
BRD-K03704870	0.0576371
F-1061-0166	0.0575641
dipropyl-5ct	0.0575279
antimycin-a	0.0575247
BRD-K53923665	0.0575048
NECA	0.0573999
BRD-K32238524	0.0573262
BRD-K85147876	0.0573176
BRD-K51454562	0.0572463
BRD-K33762302	0.057216
farnesylthiotriazole	0.0571335
BRD-A71707563	0.0570343
FTase-inhibitor-B581	0.0568687
SJB-AF-2	0.0568137
BRD-K85051645	0.0567904
BRD-K15885023	0.0567122
tyrphostin-AG-82	0.0567002
boldine	0.0566834
GBR-13069	0.0566128
CP-724714	0.0566055
BRD-K32656671	0.0565459
BRD-K63368502	0.0565363
clomipramine	0.056452
BRD-K92754162	0.056342
GR-32191	0.0563407
cefotaxime	0.0563141
olopatadine	0.0561153
niacin	0.0561067
ketoprofen	0.0558871
BRD-K29138830	0.0558857
NNC-63-0532	0.0558575
BRD-K93155496	0.0558374
W-7	0.055759
carbamazepine	0.0556871
lovastatin	0.0556643
BRD-K15428056	0.0556041
BRD-K71879957	0.0555813
KU-C104145	0.0555484
xaliproden	0.0555156
iloprost	0.0554807
retinyl-acetate	0.0553063
BRD-K99433267	0.0552014
BRD-A74699940	0.0551003
amthamine	0.054939
BRD-K39010473	0.0548187
BRD-K04363266	0.054785
pifithrin-alpha	0.0547813
praziquantel	0.0547243
quizartinib	0.0546965
salvinorin-a	0.0546257
EMD-66684	0.0544551
PNU-120596	0.0543724
ZM-241385	0.0543504
BRD-K03857568	0.0542149
BRD-A17718497	0.0541058
BRD-K56024573	0.0539707
L-750667	0.0539459
MR-16728	0.0539121
BRD-A82913781	0.0539094
immethridine	0.0538585
BRD-K12621773	0.0538164
SB-200646	0.053713
BRD-K76999748	0.0536713
BRD-K18814832	0.0536209
BRD-K18096819	0.0535765
nifedipine	0.0535488
SB-221284	0.0534576
HTS-12264SC	0.0534335
JAS07-007	0.0533903
BRD-K86217247	0.0533365
GR-127935	0.0532951
pinacidil	0.053171
BRD-K23841751	0.0530928
BRD-K89696951	0.0530219
BRD-K14833463	0.0529497
benzonatate	0.0528818
BRD-K11778076	0.0528771
tyrphostin-AG-825	0.0527863
ornidazole	0.0526418
lavendustin-c	0.0526276
linopirdine	0.0525638
BRD-A25416824	0.0524505
BRD-A94381689	0.0522983
BRD-A40560522	0.0522781
motesanib	0.0521662
ST-4034902	0.0521525
IRL-2500	0.0521222
ARG-A1-2	0.0520078
calcifediol	0.0519621
piroxicam	0.051896
BRD-K82024442	0.0517723
toltrazuril	0.05173
VU-0402604	0.051688
PD-160170	0.0516748
raloxifene	0.0516029
VU-0402605	0.0515908
BRD-K60965159	0.0515404
RDR-01440SC	0.0515183
atomoxetine	0.0514804
SRC-kinase-inhibitor-II	0.0514324
BRD-K59939374	0.0513122
BRD-K82492171	0.0511743
PP-3	0.0511514
rizatriptan	0.0510905
BRD-K73707305	0.051065
BRD-K28284219	0.051036
BRD-K70751730	0.0509464
benzydamine	0.0509117
danazol	0.0508887
ST-012525	0.0507946
deguelin	0.0506383
SA-85901	0.050625
harpagoside	0.050508
SCH-23390	0.0504422
clobetasol	0.0503734
W-9	0.0503535
tyrphostin-AG-835	0.050317
BRD-K11757396	0.0499656
Ro-19-4605	0.0498427
RU-24969	0.0498245
tamoxifen	0.0497994
brinzolamide	0.0496232
clomethiazole	0.0494565
tyrphostin-AG-18	0.0494451
adipiodone	0.049365
isoxicam	0.0492952
BRD-K51696048	0.0492567
heraclenol	0.049244
BRD-K45895591	0.0492203
BRD-K57293132	0.0490949
Ro-16-6941	0.0489735
BRD-K01806521	0.048926
BRD-K87113270	0.0488398
BRD-K90700939	0.0488107
BRD-K53335770	0.0486937
siguazodan	0.0486741
ciglitazone	0.0486305
alverine	0.0486266
SR-59230A	0.048587
7-hydroxy-PIPAT	0.0483311
gavestinel	0.0482756
escitalopram	0.0481402
ibuprofen-(S)	0.0480477
BRD-K67414432	0.0480204
tyrphostin-AG-1296	0.0480153
BRD-K29500995	0.0479891
PF-3845	0.0479562
tretinoin	0.0479192
BRD-K85237725	0.0479003
BRD-K64058329	0.0478853
TER-14687	0.0477538
BRD-K95842463	0.0474398
BRD-K03176945	0.0473879
BRD-K01089529	0.0472993
NK42-I-109-1	0.0472972
BRD-K57836103	0.0472809
BRD-A84102390	0.0472762
picotamide	0.0472016
BRD-K65258912	0.047115
totaralolal	0.0469933
BRD-K32321439	0.0468974
benzamil	0.0467617
ungerine	0.0466435
aniracetam	0.0466367
ciclacillin	0.0465083
BRD-A96006241	0.0464165
BRD-K40566034	0.0463598
KU-C103904N	0.0463465
meprylcaine	0.0462011
BRD-K76363932	0.0461942
nitrendipine	0.0461789
quercetagetin	0.046169
BRD-K25835021	0.0461563
BRD-K69795440	0.0460867
BRD-K35191571	0.0460643
BRD-K92107474	0.0459882
VU-0366037-2	0.045911
lupanine	0.0457945
BRD-K20123385	0.0457237
nadolol	0.0455662
BRD-K84102257	0.0454889
carbinoxamine	0.0454572
BRD-K98856658	0.0454196
bemesetron	0.0454052
KU-C103884	0.0453989
BRD-K94296811	0.0453141
VU-0447126-2	0.0452584
CHEMBL-374350	0.0452269
dinoprostone	0.0451318
pipamperone	0.045106
isoxsuprine	0.0450784
guanfacine	0.0449614
deltaline	0.0449358
imperatorin	0.0449356
BRD-K03339442	0.0449195
BRD-K51774655	0.0446277
BRD-A77704559	0.0446093
loreclezole	0.0446055
BRD-K75302809	0.04455
CP-94253	0.0445436
SEW-05685	0.0445399
BRD-K57786095	0.0444687
BRD-K37883585	0.0444515
nateglinide	0.0444185
BRD-K88784410	0.0443102
KI-16425	0.0442896
SB-203580	0.0441699
BRD-K82137294	0.0441553
AMN-082	0.044093
ryanodine	0.043963
T-0156	0.0439531
RS-56812	0.0439483
BRD-K98288062	0.0439004
diarylpropionitrile	0.0438457
BRD-K74989018	0.0438454
isocarboxazid	0.0437665
BRD-K60729220	0.0437086
benperidol	0.0436231
BRD-A81372523	0.0436054
BRD-K11147885	0.043596
dihydrexidine	0.0433747
skimmianine	0.0433612
ZM-306416	0.0431788
BRD-K37984227	0.0430626
BRD-K24754728	0.0430537
toremifene	0.043024
BRD-K19973744	0.0430086
carbacyclin	0.0429362
oxaprozin	0.0426871
BRD-K24214483	0.0426625
AG-490	0.042637
cilostamide	0.0425628
somatostatin	0.0424631
CGS-12066B	0.0424425
KUC104235N	0.0423349
BRD-K87371039	0.0422673
BW-723C86	0.0422426
phenazone	0.0422006
BRD-K71140693	0.0421296
BRD-A77577770	0.042093
UTMB-00530	0.042036
BRD-A69421747	0.0419534
androstanol	0.0419339
SR-95639A	0.0419264
BRD-K85580279	0.0419186
SD-6-035-B2	0.0419036
duloxetine	0.0418999
dobutamine	0.0418282
BRD-K73700643	0.0418152
anastrozole	0.0417194
SDZ-WAG-994	0.0416604
hypericin	0.0414135
BRD-K78223772	0.0413307
[truncated: 915 more rows]
