# Supplementary material for: A survey of optimal strategy for signature-based drug repositioning and an application to liver cancer
Source: eLife journal article supplement (doi:10.7554/elife.71880), 2022-02-18
Supplement: supp [file elife-71880-supp-v1.zip › elife_poa_e71880_Supplementary_file_3.xlsx]

## Sheet: Sheet1
Supplementary file 3: Benchmarking dataset for AUC-based standard.
Compound name	IC50 value	Group
afatinib	2.70582	Effevtive
amonafide	9.78	Effevtive
amperozide	95	Ineffective
amsacrine	5.21	Effevtive
antimycin-a	100	Ineffective
apigenin	70.18	Ineffective
artesunate	12.7	Ineffective
asiatic-acid	22.45	Ineffective
AT-7519	0.226049	Effevtive
auranofin	5.6	Effevtive
axitinib	38.7	Ineffective
AZD-7762	0.147242	Effevtive
azithromycin	126.5	Ineffective
belinostat	0.8043	Effevtive
benzylpenicillin	10000	Ineffective
betulinic-acid	24.6	Ineffective
BI-2536	0.217487	Effevtive
bosutinib	4.4519	Effevtive
brazilin	12.03	Ineffective
brefeldin-a	0.35	Effevtive
bufalin	0.5945	Effevtive
BX-912	11.4118	Ineffective
calcitriol	50	Ineffective
camptothecin	0.335	Effevtive
carbamazepine	158.489	Ineffective
carprofen	165.959	Ineffective
carvedilol	17.378	Ineffective
celastrol	4.01	Effevtive
celecoxib	10.03	Ineffective
chlorambucil	111.8	Ineffective
chloroquine	30	Ineffective
cinobufagin	3.7775	Effevtive
cladribine	0.04	Effevtive
clozapine	47.863	Ineffective
CP-466722	4.85874	Effevtive
cucurbitacin-i	15.8	Ineffective
cycloheximide	56.12	Ineffective
dactinomycin	0.01	Effevtive
dasatinib	8.15696	Effevtive
daunorubicin	4.91	Effevtive
decitabine	20	Ineffective
deoxycholic-acid	100	Ineffective
docetaxel	0.2	Effevtive
dovitinib	1.8563	Effevtive
doxorubicin	1.065	Effevtive
entinostat	30.0604	Ineffective
enzastaurin	20	Ineffective
epirubicin	0.985	Effevtive
erlotinib	0.12	Effevtive
everolimus	20	Ineffective
floxuridine	8.91	Effevtive
fluconazole	300	Ineffective
fluphenazine	4.38258	Effevtive
fluvastatin	0.028	Effevtive
gedunin	100	Ineffective
gefitinib	10	Ineffective
geldanamycin	0.3	Effevtive
genistein	100	Ineffective
imatinib	17.5	Ineffective
irinotecan	4	Effevtive
ispinesib	2	Effevtive
lamivudine	10	Ineffective
lapatinib	6.27	Effevtive
linezolid	25	Ineffective
lovastatin	0.079	Effevtive
methysergide	10	Ineffective
mitoxantrone	14.825	Ineffective
mocetinostat	4.15	Effevtive
mycophenolic-acid	100	Ineffective
nimesulide	35.21	Ineffective
nocodazole	0.6	Effevtive
nonoxynol-9	61	Ineffective
noscapine	1	Effevtive
NVP-TAE684	2.34914	Effevtive
omeprazole	10	Ineffective
paclitaxel	0.084	Effevtive
palbociclib	2.06731	Effevtive
parachlorophenol	1700	Ineffective
pazopanib	10.8217	Ineffective
PD-173074	5.41779	Effevtive
pentamidine	159.71	Ineffective
perphenazine	16.2181	Ineffective
PF-562271	5.94816	Effevtive
phenoxazine	204.174	Ineffective
PI-103	4.28872	Effevtive
piperlongumine	5.36168	Effevtive
pirarubicin	0.538559	Effevtive
pravastatin	7.55	Effevtive
primaquine	101	Ineffective
puromycin	42.08	Ineffective
pyrimethamine	20	Ineffective
quercetin	12	Ineffective
raltitrexed	1.3	Effevtive
resveratrol	79.95	Ineffective
roscovitine	8.61132	Effevtive
rottlerin	20	Ineffective
ruxolitinib	20	Ineffective
simvastatin	3.33291	Effevtive
sorafenib	6.3	Effevtive
staurosporine	6.73	Effevtive
sulforaphane	19.47	Ineffective
tacrolimus	100	Ineffective
tamoxifen	14.85	Ineffective
telmisartan	10	Ineffective
temsirolimus	2	Effevtive
tipifarnib	1.90955	Effevtive
tozasertib	63.4	Ineffective
ubenimex	257.26	Ineffective
vemurafenib	5.48	Effevtive
vinblastine	0.081	Effevtive
vincristine	0.2	Effevtive
vinorelbine	23.12	Ineffective
vorinostat	4.1	Effevtive
xanthohumol	35	Ineffective
YM-155	0.0834979	Effevtive
zaprinast	10	Ineffective
zolantidine	76	Ineffective
