# Supplementary material for: A survey of optimal strategy for signature-based drug repositioning and an application to liver cancer
Source: eLife journal article supplement (doi:10.7554/elife.71880), 2022-02-18
Supplement: supp [file elife-71880-supp-v1.zip › elife_poa_e71880_Supplementary_file_4.xlsx]

## Sheet: Sheet1
Supplementary file 4: Benchmarking dataset for KS statistic-based standard.
Compound name	NCT number	Clinical phase
axitinib	NCT01210495,NCT01352728	Phase 2
belinostat	NCT00321594	Phase 1,2
brivanib	NCT00825955,NCT00437424,NCT00355238	Phase 1,2,3
capecitabine	NCT00216437,NCT00464295	Phase 1,2
celecoxib	NCT00057980,NCT00293436	Phase 1,2
dasatinib	NCT00459108	Phase 2
dexamethasone	NCT02987907,NCT04251715	Phase 2,3
docetaxel	NCT00532441,NCT00006010	Phase 2
dovitinib	NCT01232296	Phase 2
doxorubicin	NCT01655693,NCT00083226,NCT00077389,NCT00003912,NCT00471965	Phase 2,3
epirubicin	NCT00820053	Phase 2
erlotinib	NCT00047333,NCT00047346	Phase 1,2
everolimus	NCT01009801,NCT01379521,NCT01488487,NCT01005199,NCT02081755	Phase 1,2,4
floxuridine	NCT00587067	Phase 2
gefitinib	NCT00071994	Phase 2
irinotecan	NCT00087282,NCT00635323,NCT00861783	Phase 1,2
ispinesib	NCT00058487	Phase 2
mitomycin-c	NCT00183885	Phase 2
MK-2206	NCT01239355	Phase 2
orantinib	NCT00784290,NCT01465464	Phase 1,2,3
pazopanib	NCT00370513	Phase 1
pentamidine	NCT02210182	Phase 1
pirarubicin	NCT02585479	Phase 2,3
sorafenib	NCT00105443	Approved
temsirolimus	NCT01008917,NCT01079767	Phase 1,2
thalidomide	NCT00921531,NCT00519688	Phase 2,3
tivozanib	NCT01807156,NCT03970616	Phase 1,2
