# Supplementary material for: A survey of optimal strategy for signature-based drug repositioning and an application to liver cancer
Source: eLife journal article supplement (doi:10.7554/elife.71880), 2022-02-18
Supplement: supp [file elife-71880-supp-v1.zip › elife_poa_e71880_Supplementary_file_5.xlsx]

## Sheet: Sheet1
Supplementary file 5. A summary of four query signatures used for benchmarking signature matching methods.
Sig1 (LIRI, RNAseq)				Sig2 (GSE54236, Array)				Sig3 (Gastro, Chen et al., 2017)				Sig4 (NC, Chen et al., 2017)
Symbol	log Fold change	Orientation		Symbol	log Fold change	Orientation		Symbol	log Fold change	Orientation		Symbol	log Fold change	Orientation
SFN	3.73933	Up-regulated		TOP2A	1.93897	Up-regulated		TERT	9.23183	Up-regulated		TERT	9.56555	Up-regulated
TOP2A	3.46497	Up-regulated		CCNB2	1.86657	Up-regulated		HOXA10	5.46416	Up-regulated		HOXA10	5.75631	Up-regulated
MYBL2	3.44568	Up-regulated		KIF20A	1.82086	Up-regulated		EGF	5.3391	Up-regulated		EGF	5.26724	Up-regulated
CDC20	3.43528	Up-regulated		BIRC5	1.69952	Up-regulated		MYBL2	4.89794	Up-regulated		MYBL2	4.86176	Up-regulated
UBE2C	3.31702	Up-regulated		CDK1	1.65007	Up-regulated		BIRC5	4.86259	Up-regulated		BIRC5	4.81763	Up-regulated
KIF20A	3.22421	Up-regulated		MELK	1.64672	Up-regulated		CDC20	4.62927	Up-regulated		CDC20	4.56266	Up-regulated
MELK	3.18238	Up-regulated		CCNB1	1.59748	Up-regulated		KIF2C	4.59512	Up-regulated		KIF2C	4.51517	Up-regulated
SPP1	3.12415	Up-regulated		UBE2C	1.5952	Up-regulated		SPP1	4.43465	Up-regulated		UBE2C	4.29943	Up-regulated
BIRC5	3.06361	Up-regulated		AURKA	1.33653	Up-regulated		MELK	4.38187	Up-regulated		SPP1	4.29498	Up-regulated
CCNB2	3.04752	Up-regulated		CENPE	1.25398	Up-regulated		SFN	4.37023	Up-regulated		MELK	4.29482	Up-regulated
CDK1	2.89821	Up-regulated		BUB1B	1.20121	Up-regulated		TOP2A	4.27446	Up-regulated		CDKN2A	4.23132	Up-regulated
CCNB1	2.86092	Up-regulated		SPP1	1.18888	Up-regulated		KIF20A	4.27153	Up-regulated		KIF20A	4.21204	Up-regulated
AURKB	2.77624	Up-regulated		KIF14	1.18263	Up-regulated		UBE2C	4.25618	Up-regulated		TOP2A	4.17737	Up-regulated
AURKA	2.74736	Up-regulated		CCNA2	1.17751	Up-regulated		CDKN2A	4.23066	Up-regulated		CCNB2	4.15295	Up-regulated
NUSAP1	2.28764	Up-regulated		AURKB	1.09234	Up-regulated		CCNB2	4.15906	Up-regulated		SFN	4.03617	Up-regulated
BMP4	2.16519	Up-regulated		TXNRD1	1.08809	Up-regulated		BUB1B	3.97592	Up-regulated		BUB1B	3.9552	Up-regulated
STMN1	1.90357	Up-regulated		CHEK1	1.05751	Up-regulated		PLK1	3.95857	Up-regulated		AURKB	3.9069	Up-regulated
TXNRD1	1.81762	Up-regulated		PLK1	1.05517	Up-regulated		AURKB	3.83261	Up-regulated		PLK1	3.87337	Up-regulated
COL1A1	1.74302	Up-regulated		KIF2C	1.03649	Up-regulated		CCNA2	3.78707	Up-regulated		CDC45	3.68913	Up-regulated
CCNA2	1.67576	Up-regulated		TERT	1.01891	Up-regulated		CDK1	3.72554	Up-regulated		CDK1	3.68215	Up-regulated
IGF2BP2	1.66545	Up-regulated		CDC45	1.0028	Up-regulated		CDC45	3.70541	Up-regulated		CCNA2	3.63053	Up-regulated
GMNN	1.62577	Up-regulated		CDC20	1.00166	Up-regulated		CENPE	3.69527	Up-regulated		CENPE	3.60186	Up-regulated
PAFAH1B3	1.56516	Up-regulated		FGFR2	-1.09166	Down-regulated		CCNB1	3.49226	Up-regulated		CCNB1	3.40004	Up-regulated
RPL39L	1.55822	Up-regulated		GSTZ1	-1.26974	Down-regulated		ORC1L	3.42695	Up-regulated		KIF14	3.3362	Up-regulated
EZH2	1.52659	Up-regulated		GHR	-1.3407	Down-regulated		KIF14	3.37795	Up-regulated		ORC1L	3.32377	Up-regulated
HIST2H2BE	1.36997	Up-regulated		PHGDH	-1.35234	Down-regulated		E2F2	3.11594	Up-regulated		E2F2	3.04613	Up-regulated
P4HA2	1.36551	Up-regulated		EPHA3	-1.39703	Down-regulated		NT5DC2	2.8974	Up-regulated		AURKA	2.79855	Up-regulated
PDGFA	1.35799	Up-regulated		IGFBP3	-1.51599	Down-regulated		PYCR1	2.75426	Up-regulated		NT5DC2	2.78879	Up-regulated
MCM3	1.35781	Up-regulated						AURKA	2.73547	Up-regulated		EPHB2	2.68339	Up-regulated
PLP2	1.35114	Up-regulated						EZH2	2.69412	Up-regulated		EZH2	2.67072	Up-regulated
TARBP1	1.32355	Up-regulated						CCNE2	2.69065	Up-regulated		PYCR1	2.6516	Up-regulated
COL4A1	1.25665	Up-regulated						CCNF	2.41243	Up-regulated		CCNE2	2.52832	Up-regulated
NCAPD2	1.25147	Up-regulated						NUSAP1	2.37439	Up-regulated		LAMA3	2.48515	Up-regulated
PSMD4	1.17158	Up-regulated						CDC25A	2.31227	Up-regulated		IGF2BP2	2.43397	Up-regulated
PLOD3	1.16917	Up-regulated						IGF2BP2	2.19848	Up-regulated		CCNF	2.36768	Up-regulated
RFX5	1.14049	Up-regulated						GMNN	2.19732	Up-regulated		NUSAP1	2.34468	Up-regulated
HIST1H2BK	1.12452	Up-regulated						POLE2	2.19054	Up-regulated		CDC25A	2.32443	Up-regulated
NT5DC2	1.09937	Up-regulated						STMN1	2.15272	Up-regulated		GMNN	2.15854	Up-regulated
SUV39H1	1.08347	Up-regulated						ZFP36	-2.07365	Down-regulated		POLE2	2.14107	Up-regulated
LAGE3	1.06682	Up-regulated						SOCS2	-2.30621	Down-regulated		CBR3	2.13887	Up-regulated
VPS72	1.04454	Up-regulated						GHR	-2.33457	Down-regulated		STMN1	2.12946	Up-regulated
RRS1	1.04055	Up-regulated						PTGS2	-2.54257	Down-regulated		PDGFA	1.99454	Up-regulated
HSPB1	1.03811	Up-regulated						EGR1	-2.58517	Down-regulated		PAFAH1B3	1.98763	Up-regulated
PPOX	1.03553	Up-regulated						FOS	-2.99365	Down-regulated		MAPK13	1.86084	Up-regulated
CHEK2	1.01529	Up-regulated										RPL39L	1.83836	Up-regulated
FAT1	1.01285	Up-regulated										TARBP1	1.81169	Up-regulated
SQSTM1	1.00466	Up-regulated										COL4A1	1.81115	Up-regulated
ANO10	1.00413	Up-regulated										HSPB1	1.70959	Up-regulated
NFIL3	-1.0072	Down-regulated										PSRC1	1.64428	Up-regulated
TLR4	-1.01083	Down-regulated										WDR67	1.6383	Up-regulated
GADD45A	-1.01191	Down-regulated										CHEK1	1.56199	Up-regulated
AGL	-1.03553	Down-regulated										SPAG4	1.55533	Up-regulated
ID2	-1.09652	Down-regulated										PLP2	1.54995	Up-regulated
MSRA	-1.15278	Down-regulated										MCM3	1.52536	Up-regulated
ATF5	-1.18249	Down-regulated										PHGDH	-1.51509	Down-regulated
DUSP6	-1.20866	Down-regulated										ACAA1	-1.51616	Down-regulated
SERPINE1	-1.21039	Down-regulated										AGL	-1.5321	Down-regulated
TRIB1	-1.22043	Down-regulated										JUN	-1.56095	Down-regulated
CAT	-1.22617	Down-regulated										CXCL2	-1.63373	Down-regulated
CCL2	-1.23943	Down-regulated										DUSP6	-1.77849	Down-regulated
PHGDH	-1.33588	Down-regulated										TBXA2R	-1.82717	Down-regulated
ACAA1	-1.34667	Down-regulated										IL1B	-1.85588	Down-regulated
EGR1	-1.39958	Down-regulated										GADD45B	-1.97196	Down-regulated
ZFP36	-1.49825	Down-regulated										IGFBP3	-1.98489	Down-regulated
GADD45B	-1.56927	Down-regulated										GSTZ1	-2.00657	Down-regulated
GSTZ1	-1.5693	Down-regulated										TRIB1	-2.01251	Down-regulated
FOS	-1.6285	Down-regulated										ZFP36	-2.17525	Down-regulated
IGFBP3	-1.93632	Down-regulated										SOCS2	-2.20098	Down-regulated
CXCL2	-1.96711	Down-regulated										SERPINE1	-2.20815	Down-regulated
GHR	-2.04139	Down-regulated										GHR	-2.48175	Down-regulated
												PTGS2	-2.49218	Down-regulated
												EGR1	-2.60738	Down-regulated
												FOS	-3.12649	Down-regulated
