# Supplementary material for: A survey of optimal strategy for signature-based drug repositioning and an application to liver cancer
Source: eLife journal article supplement (doi:10.7554/elife.71880), 2022-02-18
Supplement: supp [file elife-71880-supp-v1.zip › elife_poa_e71880_Supplementary_file_6.xlsx]

## Sheet: Sheet1
Supplementary file 6A: Results of AUC-based performance evaluation of six signature matching methods. The DR-AUC values averaged across all the conditions (AvgAUC) were summarized. Note that higher AvgAUC values indicated better performance and values in bold denote m
Method name	SigLIRI			SigGSE54236			Siggastro			SigNC
	AvgAUC	P value		AvgAUC	P value		AvgAUC	P value		AvgAUC	P value
XSum	0.617	0.072		0.624	0.057		0.62	0.065		0.624	0.057
XCos	0.603	0.116		0.601	0.123		0.57	0.296		0.573	0.275
XCor	0.598	0.135		0.608	0.1		0.535	0.597		0.565	0.334
XSpe	0.594	0.154		0.584	0.207		0.509	0.813		0.569	0.304
KS test	0.583	0.213		0.398	1		0.591	0.169		0.566	0.327
RGES	0.588	0.185		0.607	0.104		0.62	0.065		0.581	0.224

## Sheet: Sheet2
Supplementary file 6B: Results of KS-based performance evaluation of six signature matching methods. The DR-ES values averaged across all the conditions (AvgES) were summarized. Note that lower AvgES values denoted better performance and values in bold denote minimum
Method name	SigLIRI			SigGSE54236			Siggastro			SigNC
	AvgES	P value		AvgES	P value		AvgES	P value		AvgES	P value
XSum	-0.541	0.014		-0.45	0.079		-0.497	0.037		-0.529	0.019
XCos	-0.375	0.201		-0.339	0.278		-0.456	0.073		-0.509	0.029
XCor	-0.395	0.161		-0.19	0.505		-0.419	0.121		-0.475	0.056
XSpe	-0.344	0.265		0.258	0.559		-0.371	0.21		-0.376	0.2
KS test	-0.46	0.068		-0.312	0.34		-0.427	0.111		-0.439	0.095
RGES	-0.464	0.065		-0.349	0.252		-0.43	0.107		-0.477	0.055

## Sheet: Sheet3
Supplementary file 6C. Selecting the optimal parameter for XSum method. Summary of the average DR-AUC/DR-ES values of each topN groups. Values in bold denote maximum (DR-AUC) or minimum (DR-ES) values.
Sig name	TopN	TopN	TopN	TopN	TopN	TopN	TopN	TopN	TopN
	50-100	100-150	150-200	200-250	250-300	300-350	350-400	400-450	450-489
Average DR-AUC
SigLIRI	0.606	0.614	0.625	0.623	0.621	0.623	0.618	0.612	0.607
SigGSE54236	0.604	0.629	0.632	0.631	0.629	0.63	0.623	0.62	0.612
Siggastro	0.604	0.622	0.627	0.622	0.623	0.626	0.622	0.618	0.616
SigNC	0.612	0.625	0.63	0.627	0.626	0.628	0.627	0.623	0.617
Average DR-ES
SigLIRI	-0.465	-0.507	-0.535	-0.582	-0.566	-0.555	-0.551	-0.559	-0.548
SigGSE54236	-0.438	-0.451	-0.443	-0.471	-0.462	-0.454	-0.45	-0.444	-0.433
Siggastro	-0.509	-0.518	-0.53	-0.524	-0.497	-0.478	-0.47	-0.473	-0.472
SigNC	-0.518	-0.53	-0.554	-0.552	-0.537	-0.519	-0.514	-0.519	-0.512
