# Supplementary material for: A survey of optimal strategy for signature-based drug repositioning and an application to liver cancer
Source: eLife journal article supplement (doi:10.7554/elife.71880), 2022-02-18
Supplement: supp [file elife-71880-supp-v1.zip › elife_poa_e71880_Supplementary_file_7.xlsx]

## Sheet: Sheet1
Supplementary file 7. The list of genes in Sig(evo).
Symbol	GeneID	Orientation
ABHD4	63874	Up
ASCC3	10973	Up
AURKA	6790	Up
AURKB	9212	Up
BAX	581	Up
BIRC5	332	Up
BMP4	652	Up
CANT1	124583	Up
CCNA2	890	Up
CCNB2	9133	Up
CCND1	595	Down
CCNE2	9134	Up
CDC20	991	Up
CDCA4	55038	Up
CHEK1	1111	Up
COASY	80347	Up
COL1A1	1277	Up
CPSF4	10898	Up
CRK	1398	Down
CTNNAL1	8727	Up
DAG1	1605	Up
DAXX	1616	Up
DCK	1633	Up
DNAJB6	10049	Up
DNMT3A	1788	Up
DRAP1	10589	Up
E2F2	1870	Up
EGR1	1958	Down
EIF4G1	1981	Up
FAM20B	9917	Up
FBXO21	23014	Down
FZD1	8321	Down
GMNN	51053	Up
GNB5	10681	Up
GNPDA1	10007	Up
GRN	2896	Up
HIST2H2BE	8349	Up
HN1L	90861	Up
IFNAR1	3454	Down
IGFBP3	3486	Down
IKBKE	9641	Up
IPO13	9670	Up
KIAA0100	9703	Up
KIF14	9928	Up
KIF20A	10112	Up
KIF2C	11004	Up
LAGE3	8270	Up
LAP3	51056	Down
LBR	3930	Up
LRRC41	10489	Up
MAMLD1	10046	Up
MAPK9	5601	Up
MBNL2	10150	Down
MCM3	4172	Up
MELK	9833	Up
MPZL1	9019	Up
MVP	9961	Up
MYO10	4651	Down
NFKBIA	4792	Down
NRIP1	8204	Down
NT5DC2	64943	Up
NUDCD3	23386	Up
NUP93	9688	Up
NUSAP1	51203	Up
NVL	4931	Up
PAFAH1B3	5050	Up
PCNA	5111	Up
PLA2G4A	5321	Down
PLOD3	8985	Up
PNKP	11284	Up
PPOX	5498	Up
PRKCD	5580	Up
PSMD2	5708	Up
PSMD4	5710	Up
PWP1	11137	Up
RAD51C	5889	Up
RAD9A	5883	Up
RAI14	26064	Up
RFC2	5982	Up
RFX5	5993	Up
RHEB	6009	Up
SCARB1	949	Up
SHC1	6464	Up
SPRED2	200734	Down
SPTAN1	6709	Up
STAT3	6774	Down
STMN1	3925	Up
STX4	6810	Up
SUV39H1	6839	Up
TARBP1	6894	Up
THAP11	57215	Up
TIMELESS	8914	Up
TLR4	7099	Down
TMCO1	54499	Up
TOP2A	7153	Up
TP53BP1	7158	Up
TRAM2	9697	Down
TRIB1	10221	Down
TXNRD1	7296	Up
ZNF586	54807	Up
