# Supplementary material for: A survey of optimal strategy for signature-based drug repositioning and an application to liver cancer
Source: eLife journal article supplement (doi:10.7554/elife.71880), 2022-02-18
Supplement: supp [file elife-71880-supp-v1.zip › elife_poa_e71880_Supplementary_file_8.xlsx]

## Sheet: Sheet1
Supplementary file 8: Results of computational drug repositioning for liver cancer.
Compound name	Xsum_score	MOA	Clinical_phase
homoharringtonine	-98.9001	protein synthesis inhibitor	Launched
IKK-2-inhibitor-V	-64.3261	IKK inhibitor|NFkB pathway inhibitor	Phase 1
selamectin	-61.3721	nematocide	Launched
clofarabine	-45.0519	ribonucleotide reductase inhibitor	Launched
triclosan	-44.5699	antibacterial agent	Launched
penfluridol	-43.4303	T-type calcium channel blocker	Launched
menadione	-42.3287	mitochondrial DNA polymerase inhibitor|phosphatase inhibitor	Launched
nonoxynol-9	-42.0915	membrane integrity inhibitor	Launched
spiperone	-41.7174	dopamine receptor antagonist	Launched
amsacrine	-39.9495	topoisomerase inhibitor	Launched
quercetin	-39.9465	polar auxin transport inhibitor	Launched
pimozide	-38.9021	dopamine receptor antagonist	Launched
triciribine	-38.878	AKT inhibitor	Phase 1/Phase 2
obatoclax	-35.6422	BCL inhibitor	Phase 3
ubenimex	-34.695	leukotriene synthesis inhibitor	Launched
vanoxerine	-34.2937	dopamine reuptake inhibitor	Phase 3
amonafide	-32.2053	topoisomerase inhibitor	Phase 3
cilnidipine	-30.3811	calcium channel blocker	Launched
pentamidine	-29.9951	anti-pneumocystis agent	Launched
ZK-93423	-29.2694	benzodiazepine receptor agonist	Phase 3
formoterol	-28.9575	adrenergic receptor agonist	Launched
YM-155	-28.9356	survivin inhibitor	Phase 2
ivermectin	-27.9384	benzodiazepine receptor agonist	Launched
GW-501516	-27.9326	PPAR receptor agonist	Phase 2
cladribine	-27.8911	adenosine deaminase inhibitor|ribonucleotide reductase inhibitor	Launched
canertinib	-26.248	EGFR inhibitor	Phase 3
parachlorophenol	-26.2189	antiinfective drug	Launched
irinotecan	-25.0046	topoisomerase inhibitor	Launched
erlotinib	-24.869	EGFR inhibitor	Launched
fipronil	-24.5809	chloride channel blocker|GABA gated chloride channel blocker	Launched
digitoxin	-24.5371	ATPase inhibitor	Launched
estradiol-cypionate	-24.1501	estrogen receptor agonist	Launched
pyrvinium-pamoate	-23.9742	androgen receptor antagonist	Launched
dobutamine	-23.724	adrenergic receptor agonist	Launched
balsalazide	-23.541	cyclooxygenase inhibitor	Launched
digoxin	-22.9685	ATPase inhibitor	Launched
mebendazole	-22.8749	tubulin polymerization inhibitor	Launched
yohimbine	-22.6596	adrenergic receptor antagonist	Launched
PHA-793887	-22.6083	CDK inhibitor	Phase 1
dexamethasone	-22.5543	glucocorticoid receptor agonist	Launched
venlafaxine	-22.0209	adrenergic inhibitor|norepinephrine reuptake inhibitor|serotonin鈥搉orepinephrine reuptake inhibitor (SNRI)	Launched
mitotane	-22.0196	antineoplastic agent	Launched
nisoxetine	-21.4022	norepinephrine reuptake inhibitor	Phase 1
SNS-314	-21.4003	Aurora kinase inhibitor	Phase 1
mocetinostat	-21.3987	HDAC inhibitor	Phase 2
gossypol	-21.2673	BCL inhibitor|MCL1 inhibitor	Phase 2
fluphenazine	-21.1555	dopamine receptor antagonist	Launched
epirubicin	-20.9244	topoisomerase inhibitor	Launched
thiostrepton	-20.9055	FOXM1 inhibitor|protein synthesis inhibitor	Launched
everolimus	-20.8507	mTOR inhibitor	Launched
isamoltane	-20.4153	adrenergic receptor antagonist	Phase 1
camptothecin	-20.4136	topoisomerase inhibitor	Phase 3
roscovitine	-20.3353	CDK inhibitor	Phase 2
zatebradine	-20.1229	HCN channel blocker	Phase 3
PF-562271	-19.7145	focal adhesion kinase inhibitor	Phase 1
hesperidin	-19.631	flavanone glycoside	Launched
dexrazoxane	-19.3991	chelating agent|topoisomerase inhibitor	Launched
sulconazole	-18.9565	sterol demethylase inhibitor	Launched
chlorambucil	-18.7075	DNA inhibitor	Launched
PNU-22394	-18.5899	serotonin receptor agonist	Phase 2
genistein	-18.317	tyrosine kinase inhibitor	Phase 2/Phase 3
masitinib	-18.253	KIT inhibitor|PDGFR tyrosine kinase receptor inhibitor|SRC inhibitor	Launched
BIBX-1382	-18.1513	EGFR inhibitor	Phase 1
mafenide	-17.9965	carbonic anhydrase inhibitor	Launched
benzonatate	-17.8824	local anesthetic	Launched
piretanide	-17.7076	glucocorticoid receptor agonist	Launched
zibotentan	-17.3749	endothelin receptor antagonist	Phase 3
tibolone	-17.3604	androgen receptor agonist|estrogen receptor agonist|progesterone receptor agonist	Launched
bupropion	-17.2563	dopamine reuptake inhibitor	Launched
caffeine	-17.0311	adenosine receptor antagonist|phosphodiesterase inhibitor	Launched
dactinomycin	-17.0086	RNA polymerase inhibitor	Launched
methylprednisolone	-16.7705	glucocorticoid receptor agonist	Launched
piperine	-16.4409	monoamine oxidase inhibitor	Phase 1
entinostat	-16.4047	HDAC inhibitor	Phase 3
ezetimibe	-16.4035	cholesterol inhibitor|Niemann-Pick C1-like 1 protein antagonist	Launched
metoprolol	-16.2428	adrenergic receptor antagonist	Launched
trapidil	-16.2331	PDGFR tyrosine kinase receptor inhibitor	Launched
icariin	-16.1158	phosphodiesterase inhibitor	Phase 3
niclosamide	-16.0888	DNA replication inhibitor|STAT inhibitor	Launched
chloroxine	-15.851	opioid receptor antagonist	Launched
ispinesib	-15.8335	kinesin inhibitor	Phase 2
ixazomib	-15.7595	proteasome inhibitor	Launched
palbociclib	-15.7261	CDK inhibitor	Launched
xaliproden	-15.1456	serotonin receptor agonist	Phase 3
ondansetron	-15.1196	serotonin receptor antagonist	Launched
etomidate	-15.0422	GABA receptor modulator	Launched
atomoxetine	-14.8817	norepinephrine transporter inhibitor	Launched
cortisone	-14.8755	glucocorticoid receptor agonist	Launched
coumarin	-14.8644	vitamin K antagonist	Launched
irbesartan	-14.6753	angiotensin receptor antagonist	Launched
danusertib	-14.6447	Aurora kinase inhibitor|growth factor receptor inhibitor	Phase 2
BI-2536	-14.6224	PLK inhibitor	Phase 2
fasudil	-14.5847	rho associated kinase inhibitor	Launched
cetirizine	-14.5349	histamine receptor antagonist	Launched
pazopanib	-14.5298	KIT inhibitor|PDGFR tyrosine kinase receptor inhibitor|VEGFR inhibitor	Launched
azithromycin	-14.3397	bacterial 50S ribosomal subunit inhibitor	Launched
ZK-93426	-14.1297	benzodiazepine receptor antagonist	Phase 1
cabergoline	-13.9831	dopamine receptor agonist	Launched
lestaurtinib	-13.97	FLT3 inhibitor|growth factor receptor inhibitor|JAK inhibitor	Phase 3
fluspirilene	-13.9628	dopamine receptor antagonist	Launched
thiothixene	-13.7542	dopamine receptor antagonist	Launched
vincristine	-13.7467	tubulin polymerization inhibitor	Launched
papaverine	-13.7295	phosphodiesterase inhibitor	Launched
anagrelide	-13.6028	phosphodiesterase inhibitor	Launched
tolazamide	-13.5885	ATP channel blocker	Launched
gliquidone	-13.5026	sulfonylurea	Launched
dicloxacillin	-13.3067	bacterial cell wall synthesis inhibitor	Launched
acitretin	-13.2845	retinoid receptor agonist	Launched
doxorubicin	-13.2282	topoisomerase inhibitor	Launched
auranofin	-13.2132	NFkB pathway inhibitor	Launched
diclofenac	-13.1937	cyclooxygenase inhibitor	Launched
serdemetan	-13.1706	MDM inhibitor	Phase 1
nortriptyline	-13.122	tricyclic antidepressant	Launched
biperiden	-13.0926	acetylcholine receptor antagonist	Launched
hypericin	-13.0843	tyrosine kinase inhibitor	Phase 3
norgestimate	-13.0558	progesterone receptor agonist	Launched
ingenol	-12.9466	PKC activator	Launched
benzamil	-12.8598	sodium channel blocker	Phase 2
famciclovir	-12.7886	DNA polymerase inhibitor	Launched
ouabain	-12.7451	ATPase inhibitor	Launched
rucaparib	-12.4405	PARP inhibitor	Phase 3
nitrendipine	-12.4108	calcium channel blocker	Launched
naringenin	-12.2595	aromatase inhibitor|TRPV antagonist	Phase 1
amodiaquine	-12.2514	histamine receptor agonist	Launched
midostaurin	-12.2278	FLT3 inhibitor|KIT inhibitor|PKC inhibitor	Launched
pinacidil	-12.2201	ATP channel activator|potassium channel activator	Launched
daunorubicin	-11.9445	RNA synthesis inhibitor|topoisomerase inhibitor	Launched
meclizine	-11.8349	constitutive androstane receptor (CAR) agonist	Launched
plinabulin	-11.7432	tubulin polymerization inhibitor	Phase 3
lypressin	-11.7377	vasopressin receptor agonist	Launched
levocabastine	-11.7318	histamine receptor antagonist	Launched
icilin	-11.7231	TRPV agonist	Phase 1
cediranib	-11.6981	KIT inhibitor|VEGFR inhibitor	Phase 3
phenelzine	-11.6757	monoamine oxidase inhibitor	Launched
gamma-linolenic-acid	-11.564	cyclooxygenase inhibitor|prostanoid receptor agonist	Phase 2
nafcillin	-11.5061	bacterial cell wall synthesis inhibitor	Launched
fenobam	-11.2948	glutamate receptor antagonist	Phase 2
amperozide	-11.1644	dopamine receptor antagonist	Launched
alaproclate	-11.1481	serotonin receptor antagonist	Phase 2
saquinavir	-10.8726	HIV protease inhibitor	Launched
benazepril	-10.7164	angiotensin converting enzyme inhibitor	Launched
phenoxybenzamine	-10.6533	adrenergic receptor antagonist	Launched
rifapentine	-10.4991	RNA polymerase inhibitor	Launched
teniposide	-10.3087	topoisomerase inhibitor	Launched
forskolin	-10.2963	adenylyl cyclase activator	Launched
diloxanide	-10.2634	protein synthesis inhibitor	Launched
vinorelbine	-10.1892	tubulin polymerization inhibitor	Launched
guanfacine	-9.96002	adrenergic receptor agonist	Launched
tetramisole	-9.72552	immunostimulant	Launched
riboflavin	-9.65605	vitamin B	Launched
amlodipine	-9.58551	calcium channel blocker	Launched
methysergide	-9.47104	serotonin receptor antagonist	Launched
acadesine	-9.36504	AMPK activator	Phase 3
glipizide	-9.28021	sulfonylurea	Launched
hydrocortisone	-9.27772	glucocorticoid receptor agonist	Launched
pirarubicin	-9.23189	topoisomerase inhibitor	Launched
cyproheptadine	-9.16556	histamine receptor antagonist	Launched
ozagrel	-9.10371	thromboxane synthase inhibitor	Launched
SDZ-NKT-343	-9.08982	tachykinin antagonist	Phase 1
quinapril	-9.02746	angiotensin converting enzyme inhibitor	Launched
metaxalone	-9.00345	muscle relaxant	Launched
OSI-027	-8.97708	mTOR inhibitor	Phase 1
enzastaurin	-8.91035	PKC inhibitor	Phase 3
pioglitazone	-8.89683	insulin sensitizer|PPAR receptor agonist	Launched
econazole	-8.88592	lanosterol demethylase inhibitor|sterol demethylase inhibitor	Launched
AT-7519	-8.83663	CDK inhibitor	Phase 2
aminopentamide	-8.78971	acetylcholine receptor antagonist	Launched
vicriviroc	-8.77388	CC chemokine receptor antagonist	Phase 3
nefopam	-8.73439	cyclooxygenase inhibitor	Launched
DMP-543	-8.64826	acetylcholine release enhancer	Phase 2
podophyllotoxin	-8.62249	microtubule inhibitor|tubulin polymerization inhibitor	Launched
dydrogesterone	-8.6136	progesterone receptor agonist	Launched
perhexiline	-8.59209	carnitine palmitoyltransferase inhibitor	Launched
carbamazepine	-8.47901	carboxamide antiepileptic	Launched
lamivudine	-8.46523	nucleoside reverse transcriptase inhibitor	Launched
haloperidol	-8.44027	dopamine receptor antagonist	Launched
afatinib	-8.42358	EGFR inhibitor	Launched
doconexent	-8.38568	PPAR receptor agonist	Launched
aminoglutethimide	-8.27172	glucocorticoid receptor antagonist	Launched
nicotinamide	-8.23855	protein synthesis stimulant	Launched
ZSTK-474	-8.18744	PI3K inhibitor	Phase 1/Phase 2
trioxsalen	-8.16602	DNA synthesis inhibitor	Launched
pyrimethamine	-8.10614	dihydrofolate reductase inhibitor	Launched
brinzolamide	-8.06919	carbonic anhydrase inhibitor	Launched
quinelorane	-8.05997	dopamine receptor agonist	Phase 3
carprofen	-8.04514	cyclooxygenase inhibitor	Launched
cefotaxime	-8.03392	bacterial cell wall synthesis inhibitor	Launched
indole-3-carbinol	-7.96094	aryl hydrocarbon receptor agonist|indoleamine 2,3-dioxygenase inhibitor	Phase 2/Phase 3
HA-1004	-7.933	calcium channel blocker	Phase 2
oxfendazole	-7.7354	anthelmintic agent	Launched
YM-976	-7.71577	phosphodiesterase inhibitor	Phase 1
rizatriptan	-7.62526	serotonin receptor agonist	Launched
celecoxib	-7.58483	cyclooxygenase inhibitor	Launched
beclomethasone-dipropionate	-7.57789	glucocorticoid receptor agonist	Launched
pantoprazole	-7.5252	ATPase inhibitor	Launched
eplerenone	-7.48303	cytochrome P450 inhibitor	Launched
pirenzepine	-7.4806	acetylcholine receptor antagonist	Launched
lofexidine	-7.30438	adrenergic receptor agonist	Launched
alvespimycin	-7.28449	HSP inhibitor	Phase 2
raltitrexed	-7.15759	thymidylate synthase inhibitor	Launched
ABT-737	-7.12314	BCL inhibitor	Phase 1/Phase 2
cromakalim	-7.04535		Phase 2
escitalopram	-7.04349	selective serotonin reuptake inhibitor (SSRI)	Launched
floxuridine	-6.99484	DNA synthesis inhibitor	Launched
fluticasone-propionate	-6.89032	glucocorticoid receptor agonist	Launched
procaterol	-6.8443	adrenergic receptor agonist	Launched
MD-920	-6.66068	NFkB pathway inhibitor	Phase 1
trazodone	-6.6125	adrenergic receptor antagonist|serotonin receptor antagonist|serotonin reuptake inhibitor	Launched
ketorolac	-6.60997	cyclooxygenase inhibitor	Launched
olopatadine	-6.47285	histamine receptor antagonist	Launched
ruxolitinib	-6.33802	JAK inhibitor	Launched
benperidol	-6.32948	dopamine receptor antagonist	Launched
BMY-14802	-6.31934	sigma receptor antagonist	Phase 2
Y-26763	-6.24734	potassium channel activator	Phase 1
diethyltoluamide	-6.20962	ionotropic receptor IR40a activator	Launched
prochlorperazine	-6.18375	dopamine receptor antagonist	Launched
midodrine	-6.1785	adrenergic receptor agonist	Launched
methylene-blue	-6.05485	guanylyl cyclase inhibitor|nitric oxide production inhibitor	Launched
ipratropium	-5.7499	acetylcholine receptor antagonist	Launched
alverine	-5.6886	muscle relaxant	Launched
bezafibrate	-5.68369	PPAR receptor agonist	Launched
erythromycin-ethylsuccinate	-5.68252	cytochrome P450 inhibitor|protein synthesis inhibitor	Launched
praziquantel	-5.66252	anthelmintic agent	Launched
nifedipine	-5.6602	calcium channel blocker	Launched
CO-102862	-5.65805	sodium channel blocker	Phase 1
estradiol	-5.58728	estrogen receptor agonist	Launched
BE-2254	-5.57302	adrenergic receptor antagonist	Phase 2
paclitaxel	-5.53411	tubulin polymerization inhibitor	Launched
acarbose	-5.51262	glucosidase inhibitor	Launched
nilutamide	-5.45282	androgen receptor antagonist	Launched
terazosin	-5.38609	adrenergic receptor antagonist	Launched
emetine	-5.33615	protein synthesis inhibitor	Phase 2
reserpine	-5.31087	vesicular monoamine transporter inhibitor	Launched
roquinimex	-5.30564	angiogenesis inhibitor|tumor necrosis factor production inhibitor	Phase 3
imiquimod	-5.24713	interferon inducer|toll-like receptor agonist	Launched
esculin	-5.10684	antioxidant	Phase 1
CL-218872	-5.05871	benzodiazepine receptor agonist	Phase 1
neratinib	-5.03876	EGFR inhibitor	Launched
picotamide	-5.0349	thromboxane receptor antagonist|thromboxane synthase inhibitor	Launched
imatinib	-4.95933	Bcr-Abl kinase inhibitor|KIT inhibitor|PDGFR tyrosine kinase receptor inhibitor	Launched
sertraline	-4.95127	selective serotonin reuptake inhibitor (SSRI)	Launched
fexofenadine	-4.90465	histamine receptor antagonist	Launched
flucloxacillin	-4.88896	bacterial cell wall synthesis inhibitor	Launched
thiethylperazine	-4.88176	dopamine receptor antagonist	Launched
irsogladine	-4.77902	phosphodiesterase inhibitor	Launched
bemegride	-4.74029	chemoreceptor agonist	Launched
moxonidine	-4.69629	imidazoline receptor agonist	Launched
estrone	-4.67574	estrogen receptor agonist|estrogenic hormone	Launched
oxantel	-4.63014	anthelmintic agent	Launched
desipramine	-4.612	tricyclic antidepressant	Launched
piperacetazine	-4.45053	dopamine receptor antagonist	Launched
molsidomine	-4.38499	guanylate cyclase stimulant	Launched
diclofenamide	-4.27959	carbonic anhydrase inhibitor	Launched
aniracetam	-4.18416	glutamate receptor agonist	Launched
ropivacaine	-4.16148	sodium channel blocker	Launched
salmeterol	-3.96052	adrenergic receptor agonist	Launched
mycophenolate-mofetil	-3.88628	dehydrogenase inhibitor|inositol monophosphatase inhibitor	Launched
vinpocetine	-3.77199	phosphodiesterase inhibitor|sodium channel blocker	Launched
rutin	-3.73125	antioxidant|capillary stabilizing agent|nitric oxide scavenger	Launched
probucol	-3.60386	atherogenesis inhibitor	Launched
sulmazole	-3.58651	adenosine receptor antagonist	Phase 1
propofol	-3.4927	benzodiazepine receptor agonist	Launched
phenethyl-isothiocyanate	-3.46637	anticancer agent	Phase 2
nizatidine	-3.42978	histamine receptor antagonist	Launched
prednisolone-acetate	-3.3278	glucocorticoid receptor agonist	Launched
medrysone	-3.22659	glucocorticoid receptor agonist	Launched
tamoxifen	-3.09492	estrogen receptor antagonist|selective estrogen receptor modulator (SERM)	Launched
bumetanide	-3.08749	solute carrier family member inhibitor	Launched
risperidone	-3.04023	dopamine receptor antagonist|serotonin receptor antagonist	Launched
fluoxetine	-3.01565	selective serotonin reuptake inhibitor (SSRI)	Launched
talipexole	-2.99419	adrenergic receptor agonist|dopamine receptor agonist	Launched
estradiol-valerate	-2.97507	estrogen receptor agonist	Launched
fenbufen	-2.93971	cyclooxygenase inhibitor	Launched
tiabendazole	-2.90547	angiogenesis inhibitor	Launched
levcromakalim	-2.89396	potassium channel activator	Phase 3
buthionine-sulfoximine	-2.86216	glutathione transferase inhibitor	Phase 1
bromocriptine	-2.83484	dopamine receptor agonist	Launched
potassium-canrenoate	-2.83025	mineralocorticoid receptor antagonist	Launched
pizotifen	-2.78657	serotonin receptor antagonist	Launched
bifemelane	-2.70213	acetylcholine release enhancer	Launched
olmesartan-medoxomil	-2.68045	angiotensin receptor antagonist	Launched
ticlopidine	-2.60328	purinergic receptor antagonist	Launched
deoxycholic-acid	-2.58288	biliverdin reductase A activator|G protein-coupled receptor agonist	Launched
tofacitinib	-2.57163	JAK inhibitor	Launched
clozapine	-2.43482	dopamine receptor antagonist|serotonin receptor antagonist	Launched
ioxaglic-acid	-2.41366	radiopaque medium	Launched
GDC-0941	-2.36726	PI3K inhibitor	Phase 2
entecavir	-2.33565	DNA replication inhibitor|nucleoside reverse transcriptase inhibitor	Launched
methocarbamol	-2.19902	muscle relaxant	Launched
nifurtimox	-2.1819	DNA inhibitor	Launched
halcinonide	-2.16778	glucocorticoid receptor agonist	Launched
mepivacaine	-2.10886	potassium channel blocker|sodium channel blocker	Launched
hydralazine	-2.06749	vasodilator	Launched
ketotifen	-2.03468	histamine receptor agonist|leukotriene receptor antagonist|phosphodiesterase inhibitor	Launched
itraconazole	-1.9934	cytochrome P450 inhibitor	Launched
valsartan	-1.9232	angiotensin receptor antagonist	Launched
meclofenamic-acid	-1.89119	cyclooxygenase inhibitor|prostanoid receptor antagonist	Launched
PU-H71	-1.86845	HSP inhibitor	Phase 1
fananserin	-1.83529	dopamine receptor antagonist|serotonin receptor antagonist	Phase 2
tinidazole	-1.8297	antiprotozoal agent	Launched
dihydroergotamine	-1.81677	serotonin receptor agonist	Launched
sonidegib	-1.75837	smoothened receptor antagonist	Launched
meloxicam	-1.71858	cyclooxygenase inhibitor	Launched
bepridil	-1.70931	calcium channel blocker	Launched
pregnenolone	-1.67612	glutamate receptor modulator	Launched
nelfinavir	-1.66145	HIV protease inhibitor	Launched
warfarin	-1.63128	vitamin K antagonist	Launched
ethisterone	-1.52119	progestogen hormone	Launched
axitinib	-1.51339	PDGFR tyrosine kinase receptor inhibitor|VEGFR inhibitor	Launched
doxapram	-1.40355	potassium channel blocker	Launched
trimetozine	-1.35623	sedative	Launched
ABT-751	-1.2527	tubulin polymerization inhibitor	Phase 2
metolazone	-1.20225	carbonic anhydrase inhibitor	Launched
pyroxamide	-1.19548	HDAC inhibitor	Phase 1
flunisolide	-1.13625	cytochrome P450 inhibitor	Launched
amitriptyline	-0.977683	norepinephrine inhibitor|norepinephrine reuptake inhibitor|serotonin receptor antagonist|serotonin鈥搉orepinephrine reuptake inhibitor (SNRI)	Launched
phenazopyridine	-0.964733	local anesthetic	Launched
prednisolone	-0.955181	glucocorticoid receptor agonist	Launched
donepezil	-0.936378	acetylcholinesterase inhibitor	Launched
decitabine	-0.904262	DNA methyltransferase inhibitor	Launched
hexylcaine	-0.899536	sodium channel blocker	Launched
hydroquinidine	-0.866858	antiarrhythmic	Launched
immethridine	-0.800861	histamine receptor agonist	Phase 1
PK-11195	-0.798506	benzodiazepine receptor antagonist	Phase 1
ilomastat	-0.779085	matrix metalloprotease inhibitor	Phase 3
BMS-754807	-0.766975	IGF-1 inhibitor	Phase 2
acyclovir	-0.752325	DNA polymerase inhibitor	Launched
FPL-55712	-0.749064	leukotriene receptor antagonist	Phase 1
pentoxifylline	-0.674746	phosphodiesterase inhibitor	Launched
zaldaride	-0.672104	calmodulin antagonist	Phase 3
propafenone	-0.665075	antiarrhythmic	Launched
FK-888	-0.640744	tachykinin antagonist	Phase 2
CI-966	-0.627035	GAT inhibitor	Phase 1
PAC-1	-0.59611	caspase activator	Phase 1
gefitinib	-0.547394	EGFR inhibitor	Launched
citalopram	-0.391876	selective serotonin reuptake inhibitor (SSRI)	Launched
altanserin	-0.314819	serotonin receptor antagonist	Phase 2
nateglinide	-0.287534	insulin secretagogue	Launched
tranilast	-0.24973	angiogenesis inhibitor	Launched
clomethiazole	-0.204744	GABA receptor antagonist|GABA receptor modulator	Launched
cyclopenthiazide	-0.170929	thiazide diuretic	Launched
chloroquine	-0.157994	antimalarial agent	Launched
lonidamine	-0.0309054	glucokinase inhibitor	Launched
norgestrel	0.00856203	progesterone receptor agonist	Launched
alprenolol	0.0684171	adrenergic receptor antagonist	Launched
HMN-214	0.100268	PLK inhibitor	Phase 1
dasatinib	0.171223	Bcr-Abl kinase inhibitor|ephrin inhibitor|KIT inhibitor|PDGFR tyrosine kinase receptor inhibitor|SRC inhibitor|tyrosine kinase inhibitor	Launched
carteolol	0.190711	adrenergic receptor antagonist	Launched
iloprost	0.195934	platelet aggregation inhibitor|prostanoid receptor agonist	Launched
PD-184352	0.23913	MEK inhibitor	Phase 2
metergoline	0.269728	dopamine receptor agonist|serotonin receptor antagonist	Launched
budesonide	0.295583	glucocorticoid receptor agonist	Launched
flupentixol	0.438617	dopamine receptor antagonist	Launched
primaquine	0.467439	antimalarial agent|DNA inhibitor	Launched
trimethobenzamide	0.491815	histamine receptor antagonist	Launched
proguanil	0.529734	dihydrofolate reductase inhibitor	Launched
resveratrol	0.531786	cytochrome P450 inhibitor|SIRT activator	Launched
lapatinib	0.549361	EGFR inhibitor	Launched
ranolazine	0.551698	sodium channel blocker	Launched
tetradecylthioacetic-acid	0.562349	lipid peroxidase inhibitor	Phase 2
oxymetazoline	0.566984	adrenergic receptor agonist	Launched
quizartinib	0.685495	FLT3 inhibitor	Phase 3
parthenolide	0.711592	NFkB pathway inhibitor	Phase 1
oxibendazole	0.743508	tubulin polymerization inhibitor	Launched
JTE-907	0.764177	cannabinoid receptor inverse agonist	Phase 1
naphazoline	0.818215	adrenergic receptor agonist	Launched
cefixime	0.957312	bacterial cell wall synthesis inhibitor	Launched
meptazinol	1.05625	opioid receptor agonist	Launched
MK-2206	1.09392	AKT inhibitor	Phase 2
BRL-37344	1.29413	adrenergic receptor agonist	Phase 2
zosuquidar	1.31068	P glycoprotein inhibitor	Phase 3
ibudilast	1.37312	leukotriene receptor antagonist|phosphodiesterase inhibitor	Launched
quinidine	1.37747	sodium channel blocker	Launched
triamterene	1.38782	sodium channel blocker	Launched
andarine	1.43065	androgen receptor modulator	Phase 1
terguride	1.44583	dopamine receptor agonist|serotonin receptor antagonist	Launched
talniflumate	1.46886	cyclooxygenase inhibitor	Launched
losartan	1.54952	angiotensin receptor antagonist	Launched
toltrazuril	1.58799	antiprotozoal agent	Launched
CGS-20625	1.60053	benzodiazepine receptor agonist|GABA benzodiazepine site receptor partial agonist	Phase 1
carvedilol	1.6522	adrenergic receptor antagonist	Launched
dihydroergocristine	1.71667	adrenergic receptor antagonist|prolactin inhibitor	Launched
moexipril	1.7309	angiotensin converting enzyme inhibitor	Launched
ZD-2079	1.74144	adrenergic receptor agonist	Phase 2
elesclomol	1.77024	oxidative stress inducer	Phase 3
E-4031	1.77819	potassium channel blocker	Phase 1
vinblastine	1.82172	microtubule inhibitor|tubulin polymerization inhibitor	Launched
clomifene	1.83544	estrogen receptor antagonist	Launched
ketanserin	1.85233	serotonin receptor antagonist	Launched
ibuprofen-(S)	1.85347	cyclooxygenase inhibitor	Launched
thiorphan	1.8547	membrane metalloendopeptidase inhibitor	Phase 1
17-hydroxyprogesterone-caproate	1.88093	progesterone receptor agonist	Launched
butoconazole	1.91787	bacterial cell wall synthesis inhibitor	Launched
amantadine	1.98996	glutamate receptor antagonist	Launched
calcitriol	2.02011	vitamin D receptor agonist	Launched
procarbazine	2.06593	monoamine oxidase inhibitor	Launched
semaxanib	2.18379	VEGFR inhibitor	Phase 3
lamotrigine	2.18924	serotonin receptor antagonist|sodium channel blocker	Launched
chenodeoxycholic-acid	2.22498	11-beta hydroxysteroid dehydrogenase inhibitor|FXR agonist	Launched
sorafenib	2.23569	FLT3 inhibitor|KIT inhibitor|PDGFR tyrosine kinase receptor inhibitor|RAF inhibitor|RET tyrosine kinase inhibitor|VEGFR inhibitor	Launched
RWJ-21757	2.2465	toll-like receptor agonist	Phase 2
calcifediol	2.34723	vitamin D receptor agonist	Launched
protriptyline	2.42261	tricyclic antidepressant	Launched
colforsin	2.56094	adenylyl cyclase activator	Phase 2
bendroflumethiazide	2.5711	sodium/potassium/chloride transporter inhibitor	Launched
tenoxicam	2.60592	cyclooxygenase inhibitor	Launched
phentolamine	2.67683	adrenergic receptor antagonist	Launched
isocarboxazid	2.71993	monoamine oxidase inhibitor	Launched
doxylamine	2.76785	histamine receptor antagonist	Launched
temozolomide	2.93449	DNA alkylating agent	Launched
flavoxate	2.95285	acetylcholine receptor antagonist	Launched
medroxyprogesterone	2.97319	progesterone receptor agonist	Launched
clofibrate	3.03891	PPAR receptor agonist	Launched
moxifloxacin	3.09799	bacterial DNA gyrase inhibitor	Launched
betaxolol	3.10986	adrenergic receptor antagonist	Launched
DPPE	3.14501	histamine receptor antagonist	Phase 3
enalapril	3.15343	angiotensin converting enzyme inhibitor	Launched
sildenafil	3.16185	phosphodiesterase inhibitor	Launched
rivaroxaban	3.2231	coagulation factor inhibitor	Launched
brimonidine	3.22324	adrenergic receptor agonist	Launched
alprostadil	3.22329	prostanoid receptor agonist	Launched
altretamine	3.31678	DNA synthesis inhibitor	Launched
lopinavir	3.3269	HIV protease inhibitor	Launched
probenecid	3.3499	uricosuric blocker	Launched
mepyramine	3.44501	histamine receptor antagonist	Launched
raclopride	3.55839	dopamine receptor antagonist	Launched
cimetidine	3.61419	histamine receptor antagonist	Launched
brivanib	3.68503	FGFR inhibitor|VEGFR inhibitor	Phase 3
telenzepine	3.69274	acetylcholine receptor antagonist	Phase 3
oxybuprocaine	3.73056	local anesthetic	Launched
ceforanide	3.74353	penicillin binding protein inhibitor	Launched
enrofloxacin	3.75519	bacterial DNA gyrase inhibitor	Launched
FR-139317	3.83417	endothelin receptor antagonist	Phase 1
levomepromazine	3.84635	dopamine receptor antagonist	Launched
REV-5901	3.898	leukotriene receptor antagonist|lipoxygenase inhibitor	Phase 2
quetiapine	3.94257	dopamine receptor antagonist|serotonin receptor antagonist	Launched
tolmetin	4.05246	cyclooxygenase inhibitor	Launched
sulforaphane	4.10294	anticancer agent|aryl hydrocarbon receptor antagonist	Phase 2
raltegravir	4.12773	HIV integrase inhibitor	Launched
IB-MECA	4.15932	adenosine receptor agonist	Phase 3
prednisone	4.17434	glucocorticoid receptor agonist	Launched
tandutinib	4.18679	FLT3 inhibitor|KIT inhibitor|PDGFR tyrosine kinase receptor inhibitor	Phase 2
fenofibrate	4.19183	PPAR receptor agonist	Launched
tripelennamine	4.20333	histamine receptor antagonist	Launched
riluzole	4.25345	glutamate inhibitor	Launched
NPC-15199	4.26436	ICAM1 antagonist	Phase 2
diflunisal	4.2723	prostanoid receptor antagonist	Launched
erythromycin	4.28392	NFkB pathway inhibitor	Launched
latrepirdine	4.35614	glutamate receptor antagonist	Phase 3
toremifene	4.37019	estrogen receptor antagonist|selective estrogen receptor modulator (SERM)	Launched
rimexolone	4.38514	glucocorticoid receptor agonist	Launched
oxyphenonium	4.4364	cholinergic receptor antagonist	Launched
benzthiazide	4.45371	carbonic anhydrase inhibitor	Launched
mepacrine	4.48809	cytokine production inhibitor|NFkB pathway inhibitor|TP53 activator	Launched
apafant	4.49115	platelet activating factor receptor antagonist	Phase 3
amcinonide	4.49327	glucocorticoid receptor agonist	Launched
mexiletine	4.52389	sodium channel blocker	Launched
felodipine	4.54551	calcium channel blocker	Launched
saracatinib	4.57262	SRC inhibitor	Phase 2/Phase 3
vardenafil	4.67938	phosphodiesterase inhibitor	Launched
biotin	4.70634	vitamin B	Launched
clofibric-acid	4.83886	PPAR receptor agonist	Launched
naproxen	4.90088	cyclooxygenase inhibitor	Launched
linezolid	4.92376	bacterial 50S ribosomal subunit inhibitor	Launched
etodolac	4.92561	cyclooxygenase inhibitor	Launched
flunarizine	4.93001	calcium channel blocker	Launched
procainamide	4.93148	sodium channel blocker	Launched
ZD-7114	4.95559	adrenergic receptor agonist	Phase 1
lidocaine	4.97036	histamine receptor agonist	Launched
GW-311616	4.98439	elastase inhibitor|leukocyte elastase inhibitor	Phase 1
acamprosate	4.99311	glutamate receptor antagonist	Launched
resorcinol	5.09699	phosphodiesterase inhibitor	Launched
flecainide	5.13019	sodium channel blocker	Launched
altrenogest	5.17605	progestogen hormone	Launched
ranitidine	5.18484	histamine receptor antagonist	Launched
buspirone	5.39582	serotonin receptor agonist	Launched
linsitinib	5.40339	IGF-1 inhibitor	Phase 3
azaperone	5.59619	dopamine receptor antagonist	Launched
temsirolimus	5.60915	mTOR inhibitor	Launched
formestane	5.6326	aromatase inhibitor	Launched
febuxostat	5.63733	xanthine oxidase inhibitor	Launched
thalidomide	5.79222	tumor necrosis factor production inhibitor	Launched
benzydamine	5.79641	prostanoid receptor antagonist	Launched
estropipate	5.86151	estrogen receptor agonist	Launched
betulinic-acid	5.88085	apoptosis stimulant|NFkB pathway inhibitor	Phase 1/Phase 2
relcovaptan	5.89216	vasopressin receptor antagonist	Phase 2
betahistine	5.92881	histamine receptor agonist|histamine receptor antagonist	Launched
naftifine	5.94926	fungal squalene epoxidase inhibitor	Launched
nicergoline	5.95738	adrenergic receptor antagonist	Launched
navitoclax	6.09212	BCL inhibitor	Phase 2
ciglitazone	6.13274	PPAR receptor agonist	Phase 2
fluvoxamine	6.21719	selective serotonin reuptake inhibitor (SSRI)	Launched
terconazole	6.22939	sterol demethylase inhibitor	Launched
propranolol	6.26082	adrenergic receptor antagonist	Launched
NVP-AUY922	6.32309	HSP inhibitor	Phase 2
vemurafenib	6.40017	RAF inhibitor	Launched
quinine	6.40906	hemozoin biocrystallization inhibitor	Launched
methantheline	6.49589	acetylcholine receptor antagonist	Launched
lidoflazine	6.5023	calcium channel blocker	Launched
disopyramide	6.52192	sodium channel blocker	Launched
maraviroc	6.56656	CC chemokine receptor antagonist	Launched
GR-235	6.58086	estrogen receptor agonist|FXR antagonist|progesterone receptor agonist	Launched
dacinostat	6.67567	HDAC inhibitor	Phase 1
CP-724714	6.67646	EGFR inhibitor|protein tyrosine kinase inhibitor	Phase 2
pargyline	6.73189	monoamine oxidase inhibitor	Launched
mifepristone	6.76001	glucocorticoid receptor antagonist|progesterone receptor antagonist	Launched
voriconazole	7.01008	cytochrome P450 inhibitor	Launched
clopidogrel	7.05853	purinergic receptor antagonist	Launched
SDZ-WAG-994	7.09352	adenosine receptor agonist	Phase 2
tretinoin	7.10704	retinoid receptor agonist|retinoid receptor ligand	Launched
noscapine	7.16295	bradykinin receptor antagonist|tubulin polymerization inhibitor	Launched
mosapride	7.17508	serotonin receptor agonist	Launched
bisoprolol	7.26658	adrenergic receptor antagonist	Launched
clomipramine	7.27337	serotonin transporter (SERT) inhibitor	Launched
fenoldopam	7.32875	dopamine receptor agonist	Launched
tenidap	7.35134	cyclooxygenase inhibitor	Phase 3
docetaxel	7.50707	tubulin polymerization inhibitor	Launched
finasteride	7.55116	5 alpha reductase inhibitor	Launched
barasertib-HQPA	7.58168	Aurora kinase inhibitor	Phase 2/Phase 3
domperidone	7.59376	dopamine receptor antagonist	Launched
nadolol	7.62027	adrenergic receptor antagonist	Launched
VX-702	7.70701	p38 MAPK inhibitor	Phase 2
crotamiton	7.78992	antipruritic	Launched
orantinib	7.80427	FGFR inhibitor|PDGFR tyrosine kinase receptor inhibitor|VEGFR inhibitor	Phase 3
fluvastatin	7.84998	HMGCR inhibitor	Launched
mestranol	7.95352	estrogen receptor agonist	Launched
xylazine	7.98366	adrenergic receptor agonist	Launched
triamcinolone	7.98473	glucocorticoid receptor agonist	Launched
fostamatinib	8.04611	SYK inhibitor	Launched
cefotiam	8.14449	bacterial cell wall synthesis inhibitor	Launched
cefdinir	8.1627	bacterial cell wall synthesis inhibitor	Launched
cholic-acid	8.16859	bile acid	Launched
bicalutamide	8.25475	androgen receptor antagonist	Launched
salicin	8.26807	anti-inflammatory agent	Phase 1
BMS-299897	8.3074	gamma secretase inhibitor	Phase 1
DUP-697	8.38519	cyclooxygenase inhibitor	Phase 1
benzylpenicillin	8.40921	penicillin binding protein inhibitor	Launched
naltrexone	8.45294	opioid receptor antagonist	Launched
hydrocortisone-valerate	8.46305	glucocorticoid receptor agonist	Launched
phenazone	8.46347	cyclooxygenase inhibitor	Launched
synephrine	8.56244	adrenergic receptor agonist	Launched
dexamethasone-acetate	8.60876	glucocorticoid receptor agonist	Launched
nalbuphine	8.66576	opioid receptor agonist|opioid receptor antagonist	Launched
doxepin	8.68972	histamine receptor antagonist	Launched
isotretinoin	8.74618	retinoid receptor agonist	Launched
propoxycaine	8.76035	local anesthetic	Launched
sertaconazole	8.7906	sterol demethylase inhibitor	Launched
motesanib	8.87509	KIT inhibitor|PDGFR tyrosine kinase receptor inhibitor|VEGFR inhibitor	Phase 3
dexchlorpheniramine	8.88168	histamine receptor antagonist	Launched
pheniramine	8.90798	histamine receptor antagonist	Launched
duloxetine	8.96538	norepinephrine reuptake inhibitor|serotonin鈥搉orepinephrine reuptake inhibitor (SNRI)	Launched
valproic-acid	8.98482	benzodiazepine receptor agonist|HDAC inhibitor	Launched
desoxypeganine	8.99904	acetylcholinesterase inhibitor|monoamine oxidase inhibitor	Phase 1
pinocembrin	9.01233	cytochrome P450 inhibitor	Phase 2
isoxsuprine	9.02275	adrenergic receptor agonist	Launched
AS-703026	9.09811	MEK inhibitor	Phase 2
alpha-linolenic-acid	9.1944	omega 3 fatty acid stimulant	Phase 3
desoximetasone	9.27379	glucocorticoid receptor agonist	Launched
nimodipine	9.27969	calcium channel blocker	Launched
dopamine	9.29936	dopamine receptor agonist	Launched
gavestinel	9.42621	glutamate receptor antagonist	Phase 3
mometasone	9.50327	glucocorticoid receptor agonist	Launched
sulfafurazole	9.59332	bacterial antifolate	Launched
rilmenidine	9.68228	adrenergic receptor agonist|imidazoline receptor agonist	Launched
lisuride	9.75372	dopamine receptor agonist	Launched
tracazolate	9.79784	GABA receptor modulator	Phase 2
ornidazole	9.80822	antiprotozoal agent	Launched
tipifarnib	9.82693	farnesyltransferase inhibitor	Phase 3
dolasetron	9.84609	serotonin receptor antagonist	Launched
remacemide	9.89522	glutamate receptor antagonist	Phase 3
lovastatin	9.91085	HMGCR inhibitor	Launched
SR-27897	9.95033	CCK receptor antagonist	Phase 2
dipyridamole	9.96324	phosphodiesterase inhibitor	Launched
hyoscyamine	9.98986	acetylcholine receptor antagonist	Launched
artesunate	10.0029	DNA synthesis inhibitor	Launched
belinostat	10.0047	HDAC inhibitor	Launched
zardaverine	10.0344	phosphodiesterase inhibitor	Phase 2
rosuvastatin	10.1192	HMGCR inhibitor	Launched
cilomilast	10.1547	phosphodiesterase inhibitor	Phase 3
etomoxir	10.2247	carnitine palmitoyltransferase inhibitor	Phase 2
raloxifene	10.253	estrogen receptor antagonist|selective estrogen receptor modulator (SERM)	Launched
dovitinib	10.3005	EGFR inhibitor|FGFR inhibitor|FLT3 inhibitor|PDGFR tyrosine kinase receptor inhibitor|VEGFR inhibitor	Phase 3
cyclopentolate	10.3048	acetylcholine receptor antagonist	Launched
retinol	10.3206	retinoid receptor ligand	Launched
piroxicam	10.4464	cyclooxygenase inhibitor	Launched
prazosin	10.5179	adrenergic receptor antagonist	Launched
iloperidone	10.6285	dopamine receptor antagonist|serotonin receptor antagonist	Launched
ribavirin	10.7572	antiviral	Launched
orphenadrine	10.7953	acetylcholine receptor antagonist	Launched
temefos	10.8128	cholinesterase inhibitor	Launched
carmoxirole	10.8488	dopamine receptor agonist	Phase 2
PCO-400	10.8848	potassium channel activator	Phase 1
ambroxol	10.9125	sodium channel blocker	Launched
granisetron	10.9398	serotonin receptor antagonist	Launched
L-368899	10.9855	oxytocin receptor antagonist	Phase 1
pirfenidone	11.0286	TGF beta receptor inhibitor	Launched
cefaclor	11.0508	bacterial cell wall synthesis inhibitor	Launched
mianserin	11.0812	serotonin receptor antagonist	Launched
glimepiride	11.0908	insulin secretagogue	Launched
proxymetacaine	11.2222	sodium channel blocker	Launched
rosmarinic-acid	11.2423	GABA transaminase inhibitor	Launched
dropropizine	11.2523	antitussive	Launched
VX-222	11.3149	HCV inhibitor	Phase 2
gabexate	11.4064	serine protease inhibitor	Launched
maprotiline	11.4359	norepinephrine reputake inhibitor|tricyclic antidepressant	Launched
somatostatin	11.4524	somatostatin receptor agonist	Launched
pevonedistat	11.5466	nedd activating enzyme inhibitor	Phase 3
aprepitant	11.6456	tachykinin antagonist	Launched
niacin	11.7299	NAD precursor|vitamin B	Launched
perphenazine	11.7392	dopamine receptor antagonist	Launched
flutamide	11.7446	androgen receptor antagonist	Launched
trimipramine	11.8234	norepinephrine reputake inhibitor|tricyclic antidepressant	Launched
rifabutin	11.9719	protein synthesis inhibitor	Launched
bemesetron	11.9794	serotonin receptor antagonist	Phase 3
clocortolone-pivalate	12.0377	steroid	Launched
TAK-715	12.0985	p38 MAPK inhibitor	Phase 2
quinpirol-(-)	12.1417	dopamine receptor agonist	Phase 2
veliparib	12.2054	PARP inhibitor	Phase 3
NECA	12.2245	adenosine receptor agonist	Launched
ciprofibrate	12.2645	PPAR receptor agonist	Launched
rolipram	12.2942	phosphodiesterase inhibitor	Phase 3
nomegestrol-acetate	12.3171	progesterone receptor agonist	Launched
ebselen	12.3235	cyclooxygenase inhibitor|glutathione peroxidase agonist|H+/K+-ATPase inhibitor|nitric oxide synthase inhibitor	Phase 2/Phase 3
nemonapride	12.3792	dopamine receptor antagonist	Launched
racecadotril	12.3796	enkephalinase inhibitor	Launched
sirolimus	12.4027	mTOR inhibitor	Launched
dosulepin	12.4956	norepinephrine reuptake inhibitor|serotonin鈥搉orepinephrine reuptake inhibitor (SNRI)|tricyclic antidepressant	Launched
zoxazolamine	12.4976	myorelaxant	Phase 2
ropinirole	12.5794	dopamine receptor agonist	Launched
melperone	12.5855	dopamine receptor antagonist|serotonin receptor antagonist	Launched
primidone	12.6101	GABA receptor antagonist	Launched
flupirtine	12.7046	glutamate receptor antagonist	Launched
scopolamine	12.7554	acetylcholine receptor antagonist	Launched
stiripentol	12.8613	GABA uptake inhibitor	Launched
milrinone	12.907	phosphodiesterase inhibitor	Launched
siguazodan	12.9715	phosphodiesterase inhibitor	Phase 1
oxaprozin	13.0802	cyclooxygenase inhibitor	Launched
tivozanib	13.0915	VEGFR inhibitor	Launched
fluconazole	13.1035	sterol demethylase inhibitor	Launched
erythromycin-estolate	13.1175	bacterial 50S ribosomal subunit inhibitor	Launched
perindopril	13.3185	angiotensin converting enzyme inhibitor	Launched
noretynodrel	13.5716	progestogen hormone	Launched
cortisone-acetate	13.6044	glucocorticoid receptor agonist	Launched
tubocurarine	13.6588	acetylcholine receptor antagonist	Launched
thiocolchicoside	13.748	GABA receptor antagonist	Launched
epicatechin-gallate-(-)	13.7644	bacterial DNA gyrase inhibitor	Phase 2
minoxidil	13.857	KATP activator|Kir6 channel (KATP) activator|vasodilator	Launched
albendazole	13.8783	tubulin polymerization inhibitor	Launched
tacrolimus	14.0471	calcineurin inhibitor	Launched
ZD-7288	14.0996	HCN channel blocker	Phase 2
betamethasone	14.1987	glucocorticoid receptor agonist	Launched
nicardipine	14.3361	calcium channel blocker	Launched
brompheniramine	14.3581	histamine receptor antagonist	Launched
naloxone	14.4021	opioid receptor antagonist	Launched
clemastine	14.4211	histamine receptor antagonist	Launched
deforolimus	14.4386	mTOR inhibitor	Phase 3
lenalidomide	14.4531	anticancer agent	Launched
flumazenil	14.467	benzodiazepine receptor antagonist	Launched
clonidine	14.4831	adrenergic receptor agonist	Launched
vecuronium	14.6642	acetylcholine receptor antagonist	Launched
ziprasidone	14.7272	dopamine receptor antagonist|serotonin receptor antagonist	Launched
chlorphenamine	14.8081	histamine receptor antagonist	Launched
prednicarbate	14.9357	phospholipase activator	Launched
mebeverine	15.0194	acetylcholine receptor antagonist	Launched
diethylcarbamazine	15.0293	lipoxygenase inhibitor	Launched
diazoxide	15.1955	potassium channel activator	Launched
capecitabine	15.2046	DNA synthesis inhibitor|thymidylate synthase inhibitor	Launched
vorinostat	15.2466	HDAC inhibitor	Launched
dextromethorphan	15.3218	glutamate receptor antagonist|sigma receptor agonist	Launched
carbenoxolone	15.3286	11-beta hydroxysteroid dehydrogenase inhibitor	Launched
ethambutol	15.3711	bacterial cell wall synthesis inhibitor	Launched
cilastatin	15.4835	dehydropeptidase inhibitor	Launched
dantrolene	15.7242	calcium channel blocker	Launched
lasalocid	15.789	bacterial permeability inducer	Launched
mitoxantrone	15.8671	topoisomerase inhibitor	Launched
rolitetracycline	15.9877	bacterial 30S ribosomal subunit inhibitor	Launched
atorvastatin	16.0071	HMGCR inhibitor	Launched
leflunomide	16.0376	dihydroorotate dehydrogenase inhibitor|PDGFR tyrosine kinase receptor inhibitor	Launched
linopirdine	16.0645	potassium channel blocker	Phase 3
physostigmine	16.118	acetylcholinesterase inhibitor|cholinesterase inhibitor	Launched
alfuzosin	16.2108	adrenergic receptor antagonist	Launched
piperidolate	16.2659	acetylcholine receptor antagonist	Launched
dihydrexidine	16.4033	dopamine receptor agonist	Phase 2
ritanserin	16.4204	serotonin receptor antagonist	Phase 3
betamethasone-acetate	16.4912	glucocorticoid receptor agonist	Launched
metoclopramide	16.5826	dopamine receptor antagonist|serotonin receptor antagonist	Launched
SR-57227A	16.6831	serotonin receptor agonist	Phase 2
TTNPB	16.7107	retinoid receptor agonist	Phase 1
palonosetron	16.7189	serotonin receptor antagonist	Launched
RU-24969	16.7575	serotonin receptor agonist	Phase 1
acepromazine	16.8653	dopamine receptor antagonist	Launched
fludroxycortide	16.9163	glucocorticoid receptor agonist	Launched
carbinoxamine	17.1322	histamine receptor antagonist	Launched
loperamide	17.1615	opioid receptor agonist	Launched
omeprazole	17.2019	ATPase inhibitor	Launched
trifluoperazine	17.3241	dopamine receptor antagonist	Launched
cilostazol	17.4117	phosphodiesterase inhibitor	Launched
deracoxib	17.428	cyclooxygenase inhibitor	Launched
nimesulide	17.4473	cyclooxygenase inhibitor	Launched
thiotepa	17.625	cytochrome P450 inhibitor	Launched
MK-1775	17.719	WEE1 kinase inhibitor	Phase 2
retinyl-acetate	17.7553		Launched
mesoridazine	17.7605	dopamine receptor antagonist	Launched
azasetron	17.9771	serotonin receptor antagonist	Launched
anastrozole	18.1353	aromatase inhibitor	Launched
progesterone	18.1417	progesterone receptor agonist	Launched
ketoprofen	18.2066	cyclooxygenase inhibitor	Launched
chlormadinone-acetate	18.3529	5 alpha reductase inhibitor	Launched
estriol	18.3715	estrogen receptor agonist	Launched
rimcazole	18.5378	sigma receptor antagonist	Phase 1
chlorpromazine	18.7104	dopamine receptor antagonist	Launched
bosutinib	18.978	Abl kinase inhibitor|Bcr-Abl kinase inhibitor|SRC inhibitor	Launched
reboxetine	19.0513	adrenergic receptor antagonist	Launched
fulvestrant	19.0656	estrogen receptor antagonist	Launched
glycopyrrolate	19.1203	acetylcholine receptor antagonist	Launched
zolmitriptan	19.1328	serotonin receptor agonist	Launched
promazine	19.3351	dopamine receptor antagonist	Launched
pravastatin	19.424	HMGCR inhibitor	Launched
PCA-4248	19.4259	platelet activating factor receptor antagonist	Phase 1
pitavastatin	19.4637	HMGCR inhibitor	Launched
sitagliptin	19.514	dipeptidyl peptidase inhibitor	Launched
tiotidine	19.6921	histamine receptor antagonist	Phase 2
tolbutamide	20.0118	ATP channel blocker	Launched
thioproperazine	20.4553	dopamine receptor antagonist	Launched
levonorgestrel	20.467	estrogen receptor agonist|glucocorticoid receptor antagonist|progesterone receptor agonist|progesterone receptor antagonist	Launched
naftidrofuryl	20.5215	adrenergic receptor antagonist	Launched
guanaben-acetate	20.6483	adrenergic receptor agonist	Launched
iobenguane	20.6927	antineoplastic agent	Launched
danoprevir	21.0351	HCV inhibitor	Phase 3
triflupromazine	21.1528	dopamine receptor antagonist	Launched
exemestane	21.2418	aromatase inhibitor	Launched
carbidopa	21.3843	aromatic L-amino acid decarboxylase inhibitor	Launched
dimercaptosuccinic-acid	21.4475	chelating agent	Launched
PD-123319	21.5336	angiotensin antagonist	Phase 1
mirtazapine	21.607	adrenergic receptor antagonist|serotonin receptor antagonist	Launched
chlorthalidone	21.778	carbonic anhydrase inhibitor	Launched
trichostatin-a	21.7871	HDAC inhibitor	Phase 1
dicycloverine	21.9423	acetylcholine receptor antagonist	Launched
amiloride	22.0457	sodium channel blocker	Launched
oxybenzone	22.741	lipase inhibitor	Launched
cinacalcet	22.846	calcium channel activator	Launched
alfadolone-acetate	22.8542	benzodiazepine receptor agonist	Phase 2
bisacodyl	22.8591	laxative	Launched
danazol	23.1223	estrogen receptor antagonist|progesterone receptor agonist	Launched
ICI-89406	23.1289	adrenergic receptor antagonist	Phase 1
GW-5074	23.6713	leucine rich repeat kinase inhibitor|RAF inhibitor	Phase 1/Phase 2
GR-79236	23.8047	adenosine receptor agonist	Phase 1
mycophenolic-acid	24.4356	dehydrogenase inhibitor|inositol monophosphatase inhibitor	Launched
Y-27152	24.6483	potassium channel activator	Phase 1
dienestrol	24.7654	estrogen receptor agonist	Launched
acetyl-farnesyl-cysteine	24.8169	methyltransferase inhibitor	Launched
cinalukast	24.9374	leukotriene receptor antagonist	Phase 2
pipamperone	25.017	dopamine receptor antagonist	Launched
verapamil	25.4353	calcium channel blocker	Launched
CGP-12177	25.485	adrenergic receptor agonist	Phase 1
palmitoylethanolamide	25.5483	cannabinoid receptor agonist	Launched
carbetocin	25.8414	oxytocin receptor agonist	Launched
sulpiride	26.553	dopamine receptor antagonist	Launched
tadalafil	26.7333	phosphodiesterase inhibitor	Launched
telmisartan	26.8882	angiotensin receptor antagonist	Launched
pindolol	27.406	adrenergic receptor antagonist	Launched
ICI-162846	28.3125	histamine receptor antagonist	Phase 1
paroxetine	28.6417	selective serotonin reuptake inhibitor (SSRI)	Launched
benzbromarone	28.6452	chloride channel blocker	Launched
labetalol	29.2984	adrenergic receptor antagonist	Launched
felbamate	29.305	glutamate receptor antagonist	Launched
loxapine	29.9141	dopamine receptor antagonist|serotonin receptor antagonist	Launched
droperidol	30.0595	dopamine receptor antagonist	Launched
zuclopenthixol	30.3535	dopamine receptor antagonist	Launched
bromhexine	30.3814	mucolytic agent	Launched
tozasertib	30.6744	Aurora kinase inhibitor|Bcr-Abl kinase inhibitor|FLT3 inhibitor|JAK inhibitor	Phase 2
PCI-24781	31.0163	HDAC inhibitor	Phase 3
PD-0325901	31.396	MEK inhibitor	Phase 2
simvastatin	31.4123	HMGCR inhibitor	Launched
amiodarone	31.6879	potassium channel blocker	Launched
amoxapine	31.7736	norepinephrine reputake inhibitor	Launched
diphenidol	31.9853	acetylcholine receptor agonist	Launched
verteporfin	32.2325	photosensitizing agent	Launched
loreclezole	32.2608	benzodiazepine receptor agonist	Phase 2
teicoplanin	32.6136	bacterial cell wall synthesis inhibitor	Launched
mefenamic-acid	32.9463	cyclooxygenase inhibitor	Launched
BP-897	33.022	dopamine receptor agonist	Phase 2
bucladesine	33.5284	adenosine receptor agonist|cAMP stimulant	Launched
nicotinyl-alcohol-tartrate	33.5858		Launched
tropisetron	34.0893	serotonin receptor antagonist	Launched
zaprinast	34.5646	phosphodiesterase inhibitor	Phase 2
lupanine	37.291	sodium channel blocker	Phase 1
mephentermine	37.5658	adrenergic receptor agonist	Launched
diltiazem	39.9362	calcium channel blocker	Launched
buphenine	41.5203	adrenergic receptor agonist	Launched
timolol	43.2133	adrenergic receptor antagonist	Launched
epirizole	44.4413	cyclooxygenase inhibitor	Launched
fenbendazole	48.6808	tubulin polymerization inhibitor	Launched
