# Supplementary figures and images for: A survey of optimal strategy for signature-based drug repositioning and an application to liver cancer
Source: eLife journal article supplement (doi:10.7554/elife.71880), 2022-02-18

SNU449

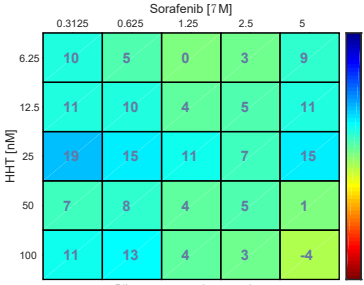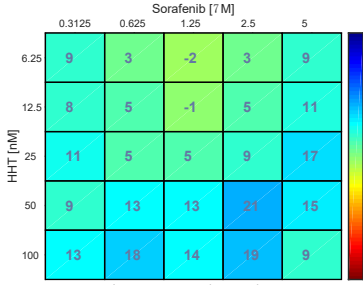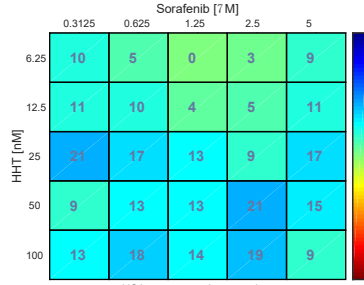

HEP3B217

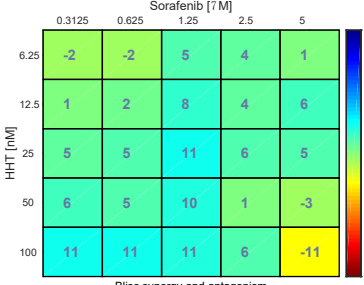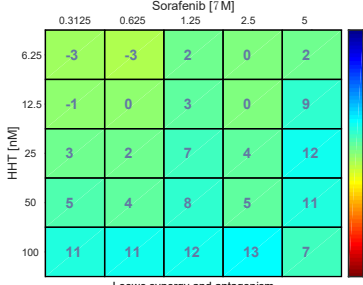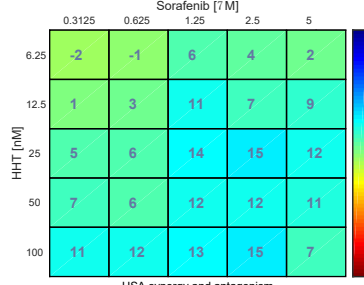

SNU398

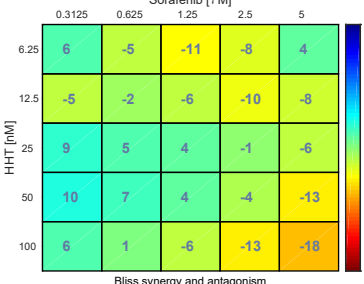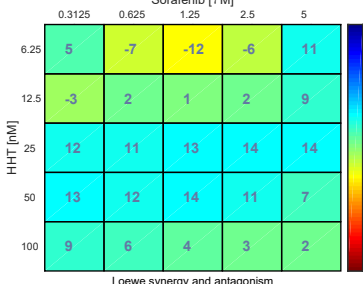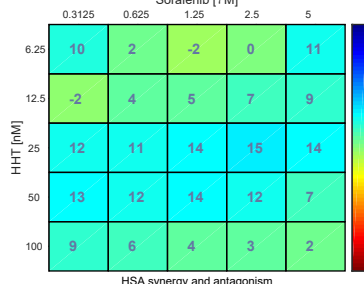

HUH6

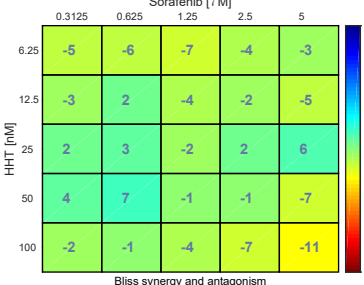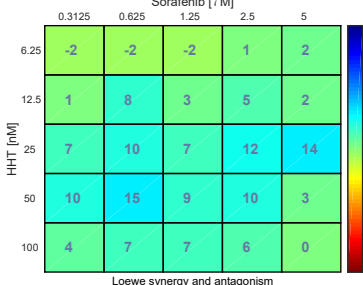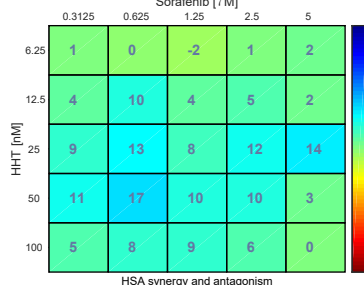

PLCPRF5

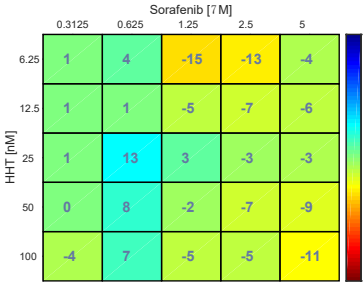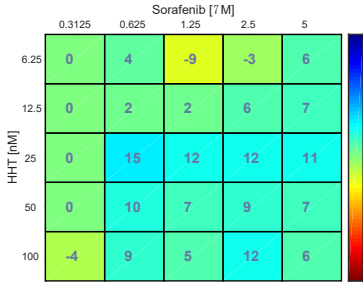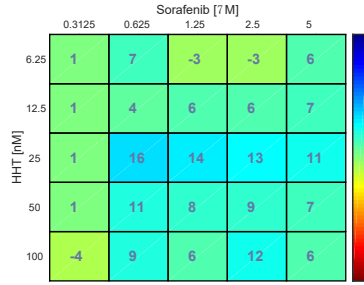

HUH7

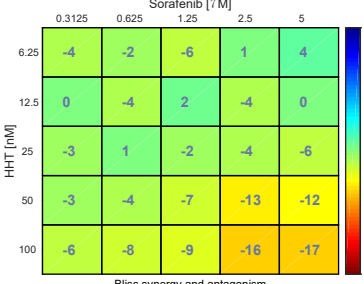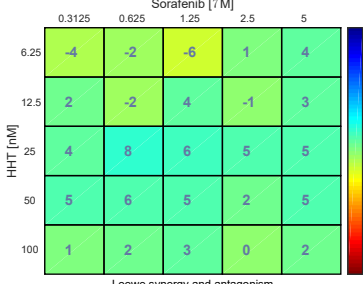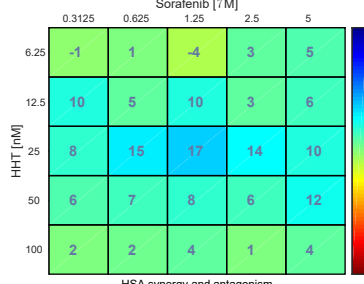

SKHEP1

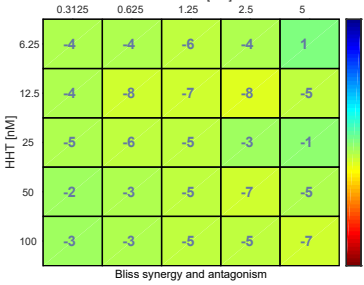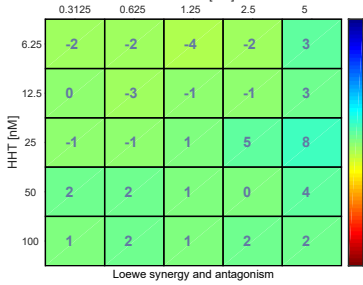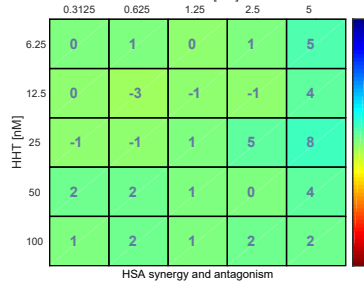

MHCC97H

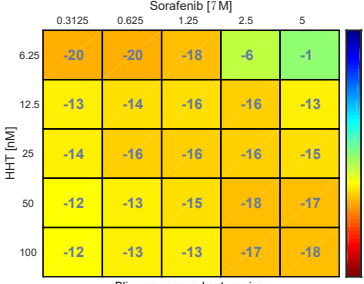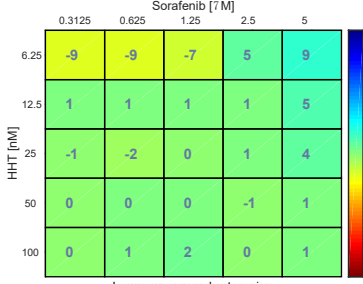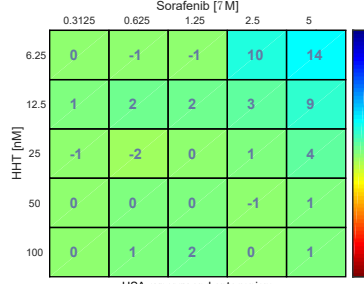

HEPG2

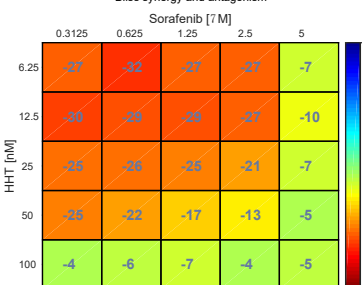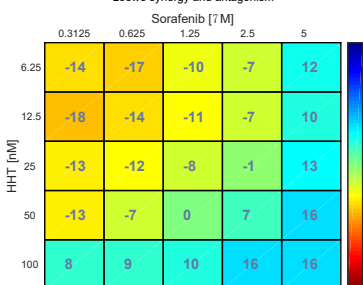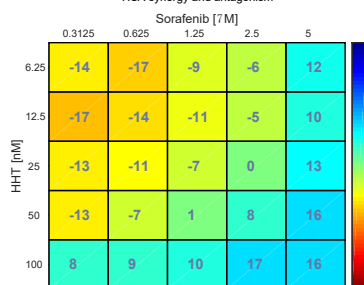

SNU475

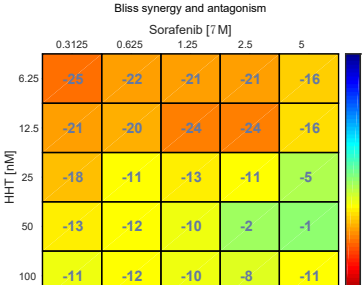

Supplement: supp [file elife-71880-supp-v1.zip]

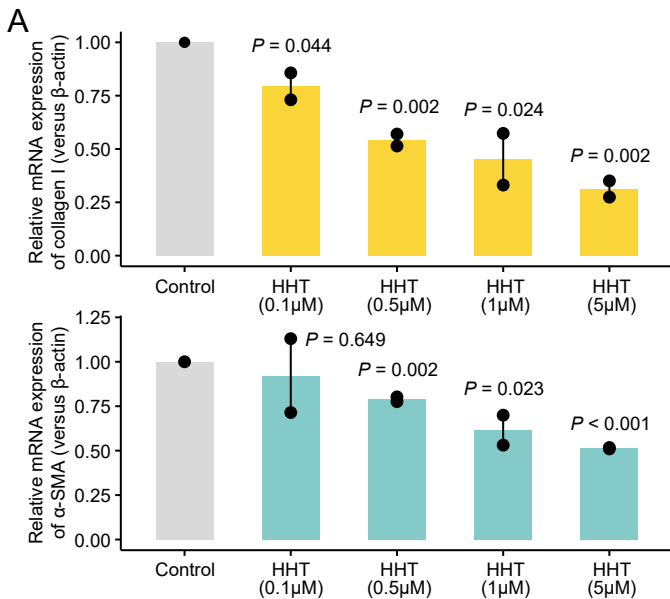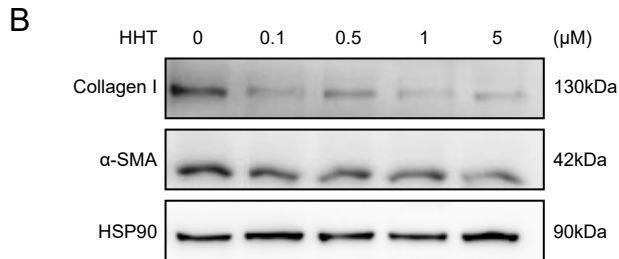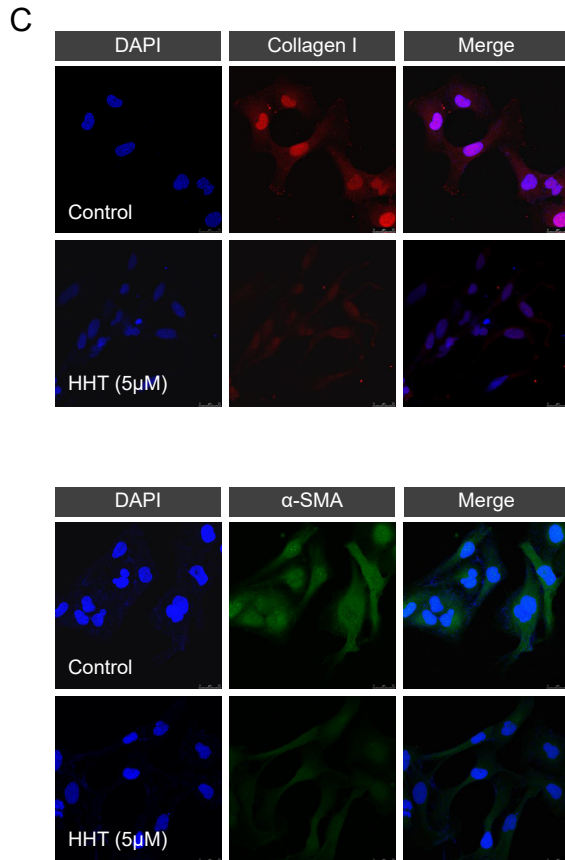

Supplement: supp [file elife-71880-supp-v1.zip]

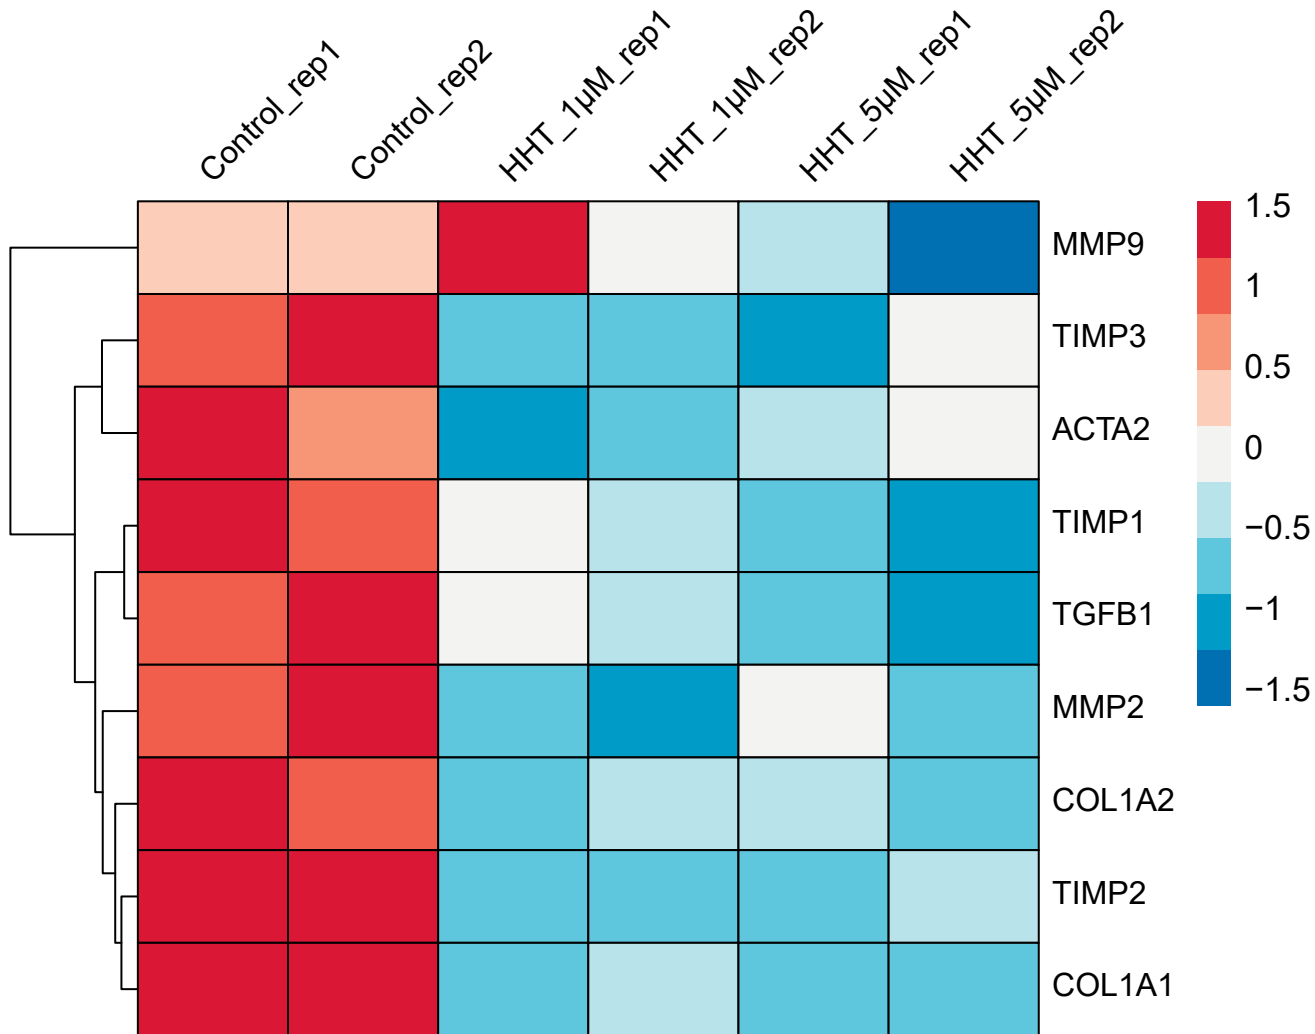

Supplement: supp [file elife-71880-supp-v1.zip]

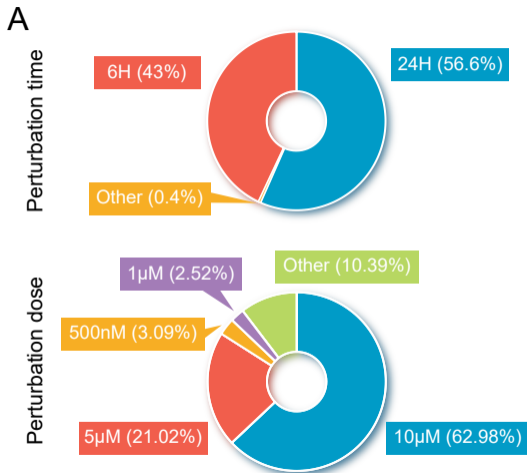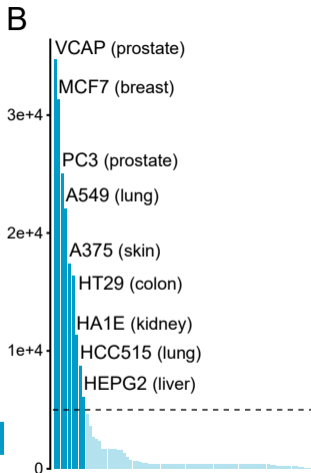

**C**

|  | 5μM / 6H | 5μM / 24H | 10μM / 6H | 10μM / 24H |        |
|--|----------|-----------|-----------|------------|--------|
|  |          | 5926      | 6120      | 3983       | A375   |
|  |          | 7153      | 5830      | 6117       | A549   |
|  |          |           | 5351      | 4430       | HA1E   |
|  |          |           | 5319      | 2112       | HCC515 |
|  |          |           | 4351      |            | HEPG2  |
|  |          | 5562      | 6010      | 3619       | HT29   |
|  |          | 5015      | 8078      | 10272      | MCF7   |
|  |          | 4423      | 7506      | 10391      | PC3    |
|  | 8516     | 9507      | 7475      | 7590       | VCAP   |

Supplement: supp [file elife-71880-supp-v1.zip › elife_poa_e71880_Figure_1_figure_supplement_2.pdf]

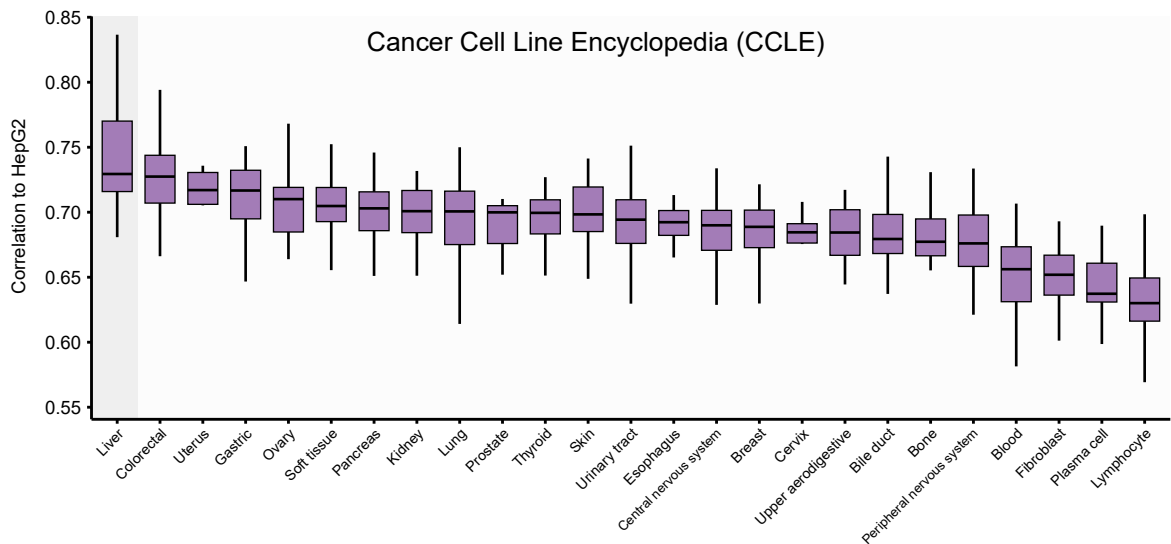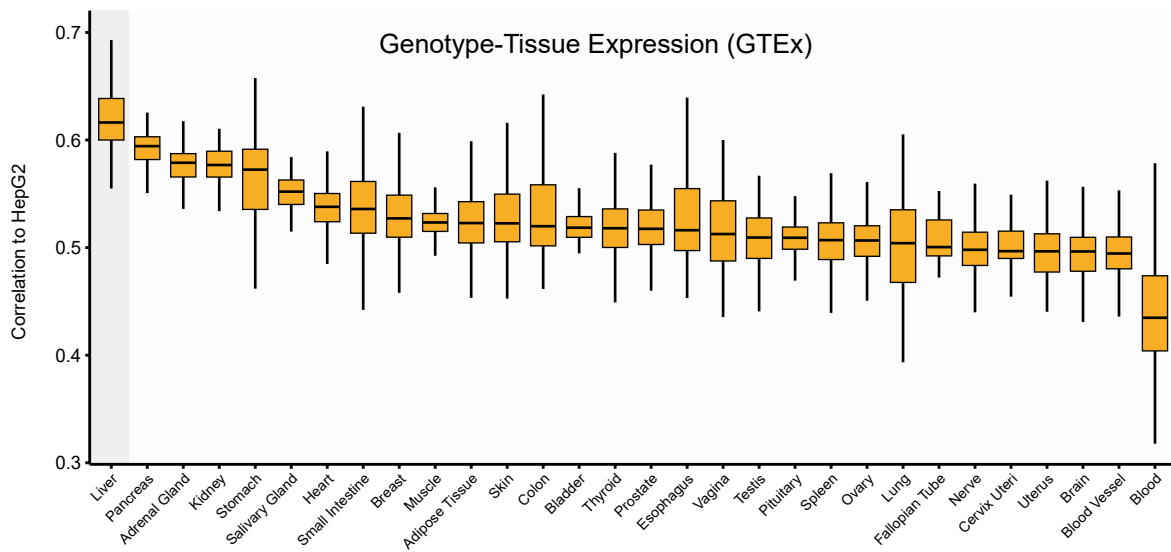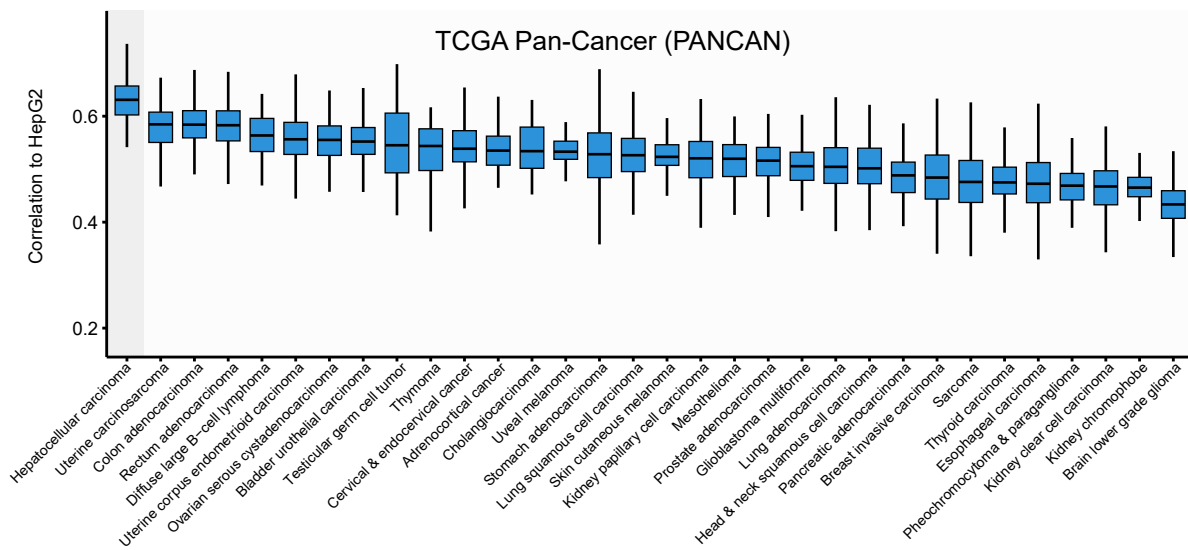

Supplement: supp [file elife-71880-supp-v1.zip › elife_poa_e71880_Figure_2_figure_supplement_1.pdf]

Sig2 (GSE54236)

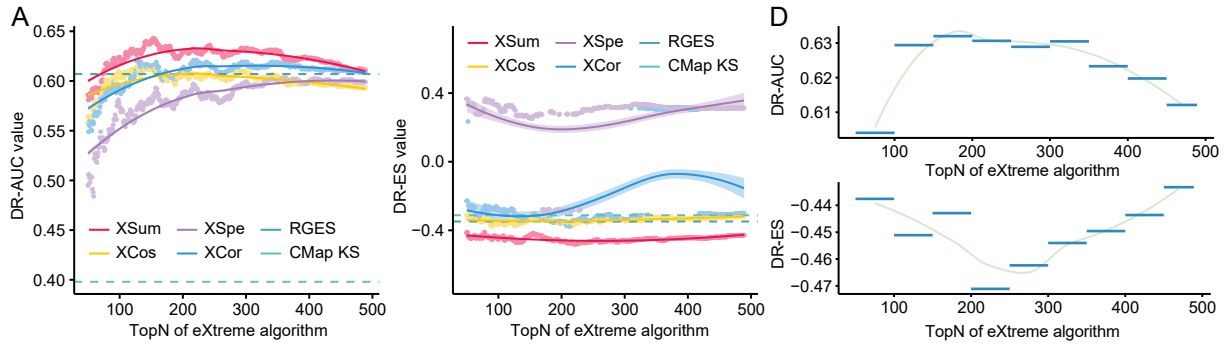

Sig3 (Gastro)

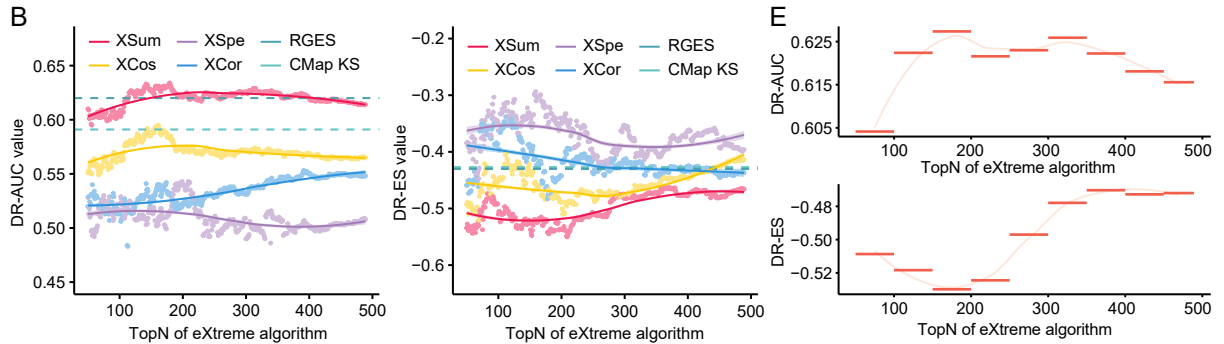

Sig4 (NC)

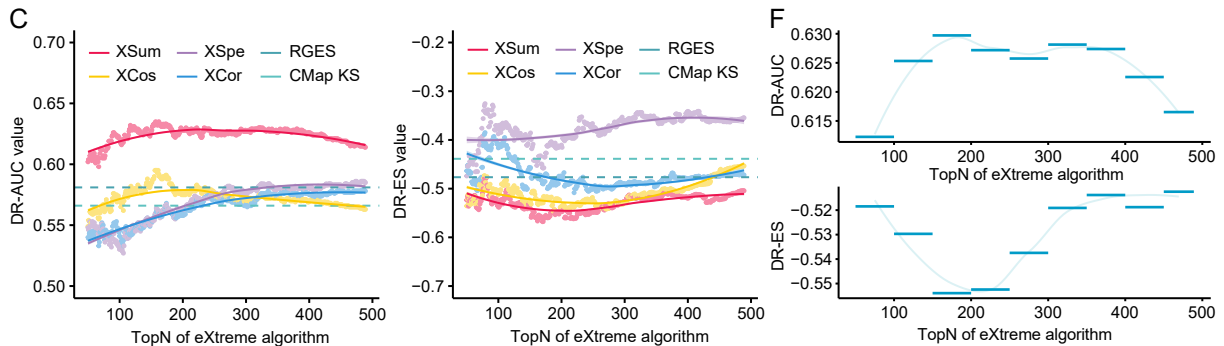

Supplement: supp [file elife-71880-supp-v1.zip › elife_poa_e71880_Figure_4_figure_supplement_1.pdf]

A

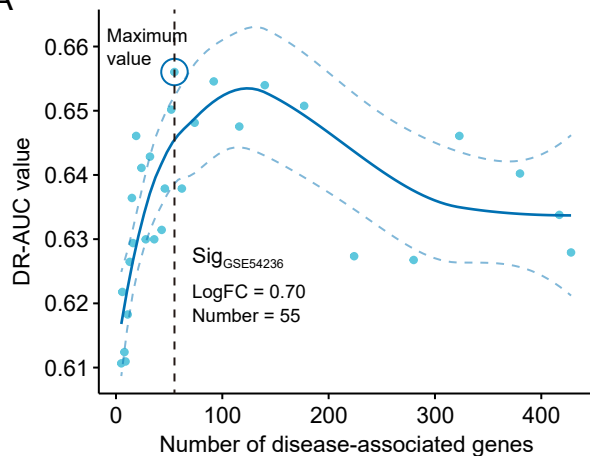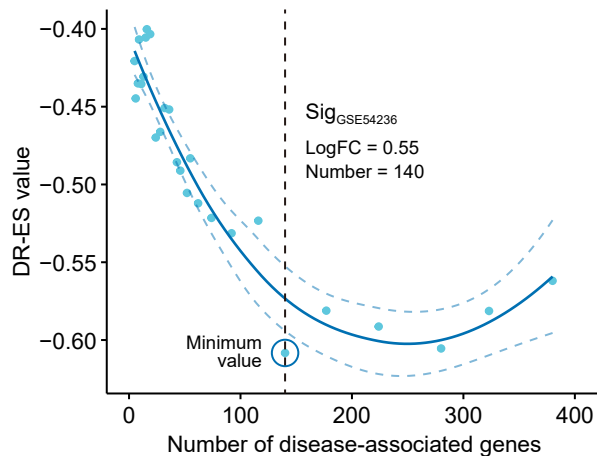

B

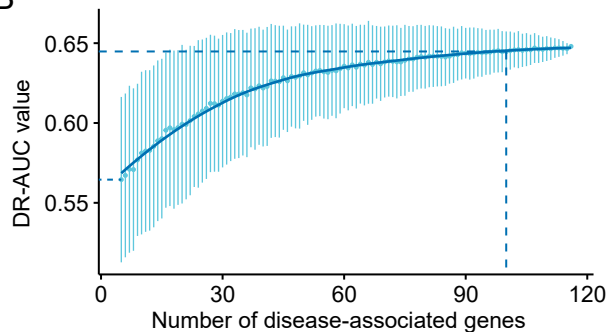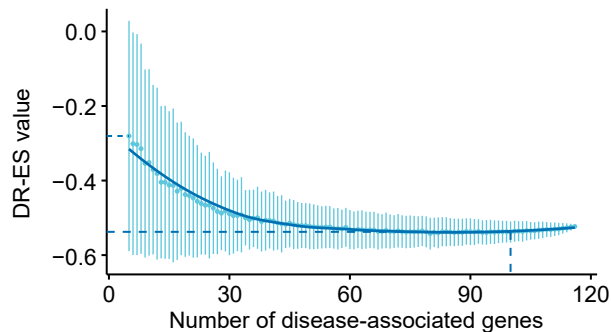

Supplement: supp [file elife-71880-supp-v1.zip › elife_poa_e71880_Figure_4_figure_supplement_2.pdf]

A

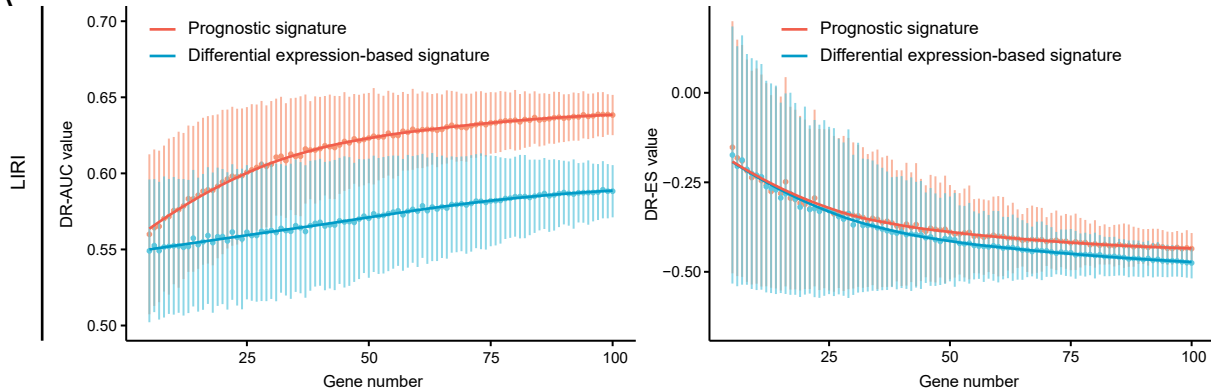

B

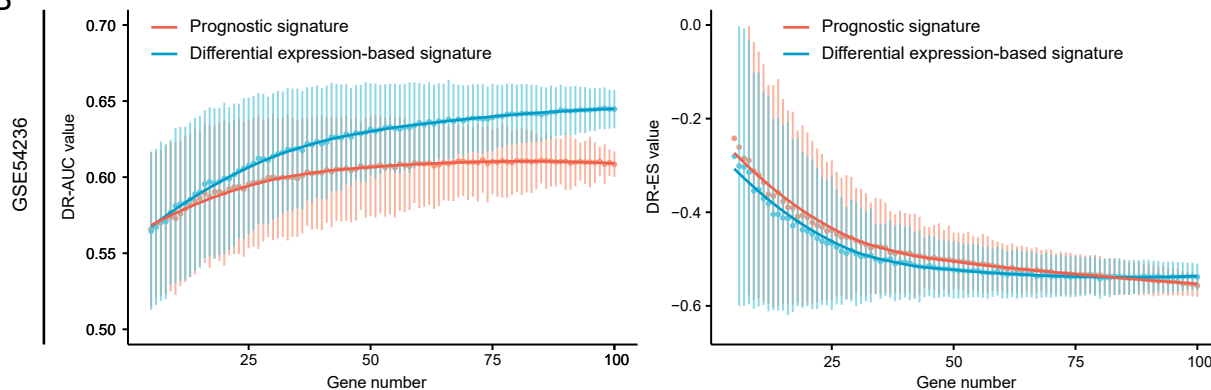

Supplement: supp [file elife-71880-supp-v1.zip › elife_poa_e71880_Figure_5_figure_supplement_1.pdf]

A

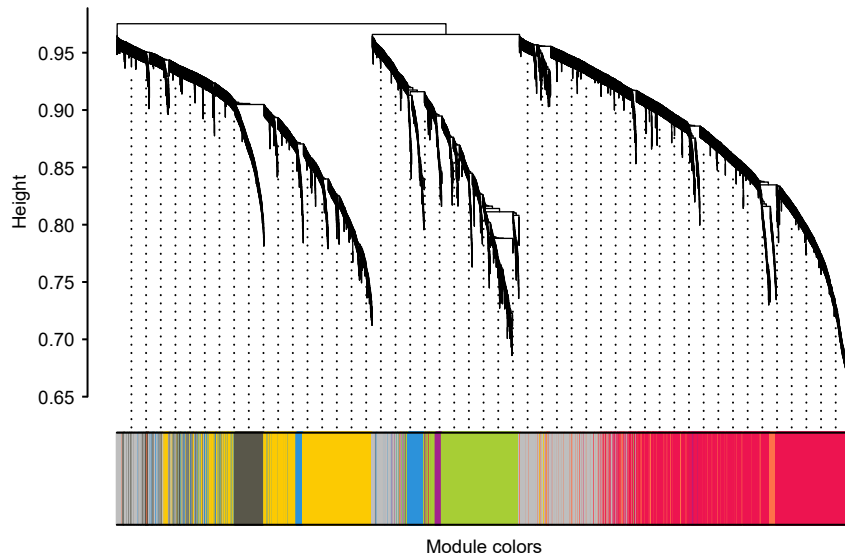

B

|     |       |                  |
|-----|-------|------------------|
| ME0 | 1,285 | 0.29<br>(0.01)   |
| ME1 | 1,738 | 0.82<br>(3e-19)  |
| ME2 | 1,090 | -0.69<br>(7e-12) |
| ME3 | 756   | -0.15<br>(0.2)   |
| ME4 | 405   | -0.57<br>(7e-08) |
| ME5 | 350   | -0.8<br>(4e-18)  |
| ME6 | 303   | 0.69<br>(7e-12)  |
| ME7 | 90    | 0.25<br>(0.03)   |

Developmental stages

C

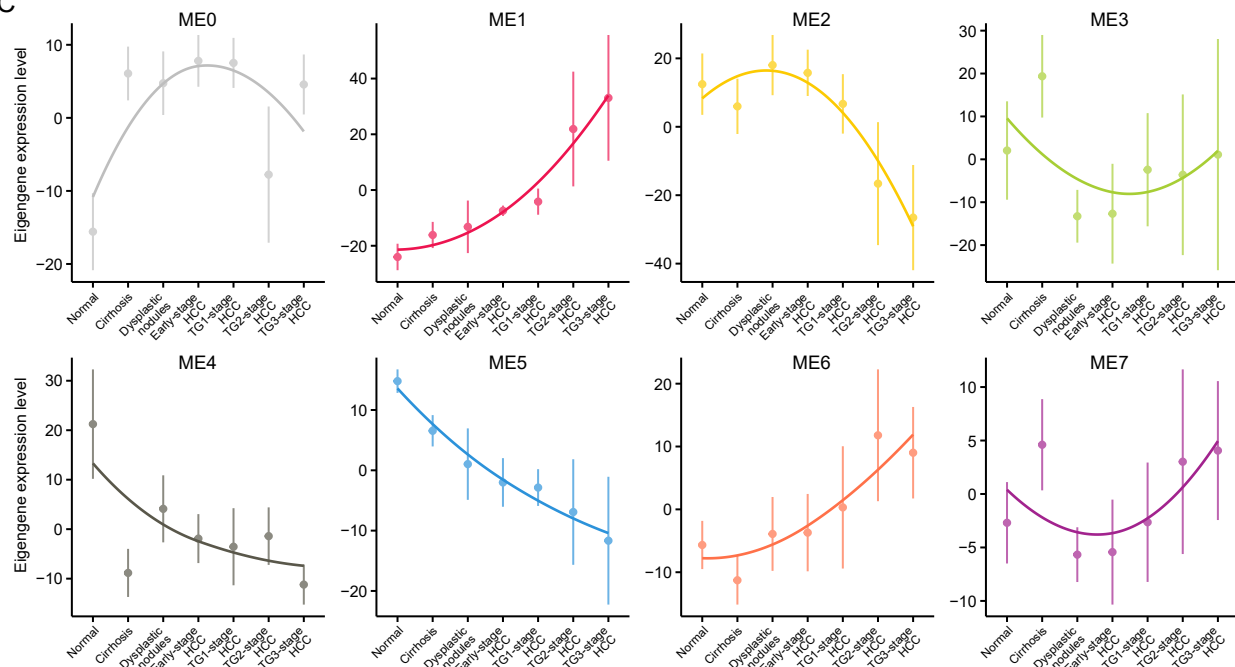

Supplement: supp [file elife-71880-supp-v1.zip › elife_poa_e71880_Figure_6_figure_supplement_1.pdf]

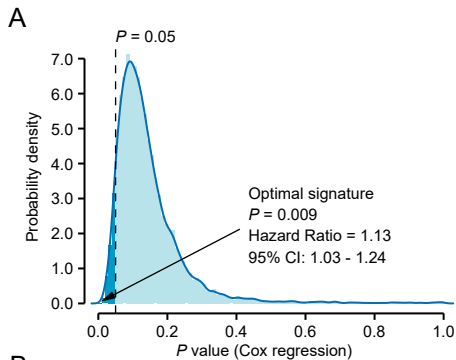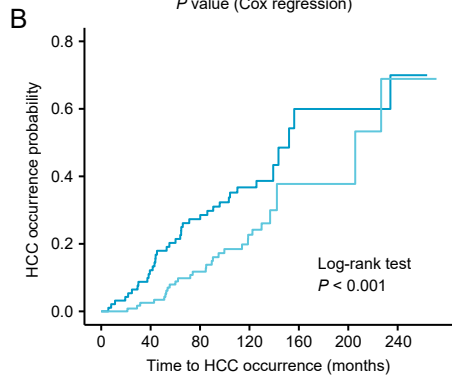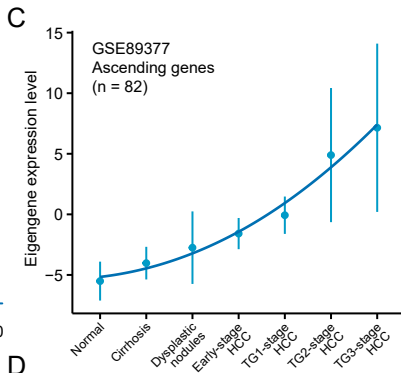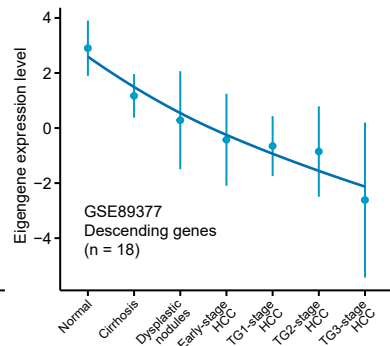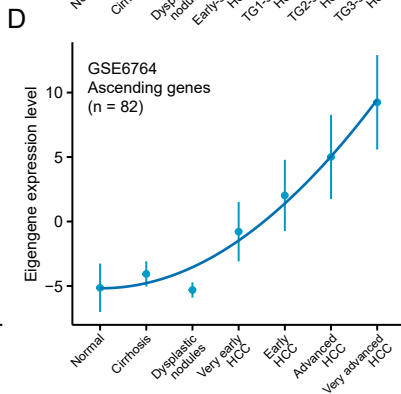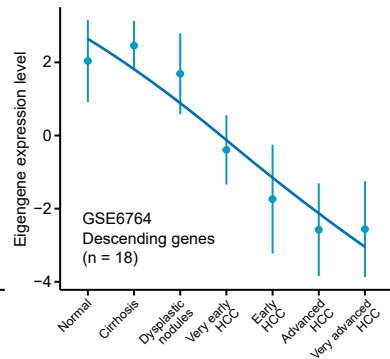

Supplement: supp [file elife-71880-supp-v1.zip › elife_poa_e71880_Figure_6_figure_supplement_2.pdf]

**A**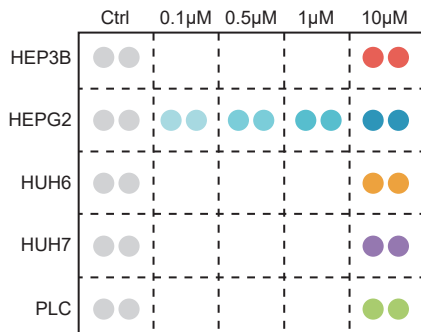**B**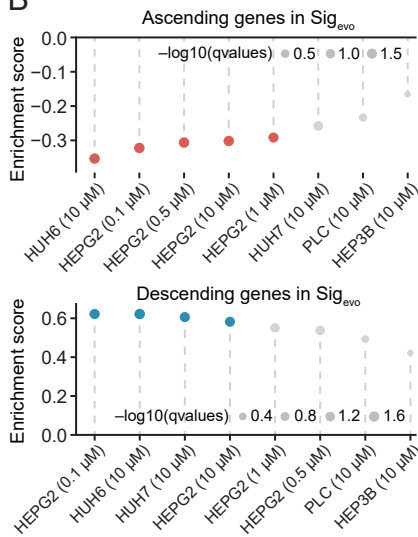**C**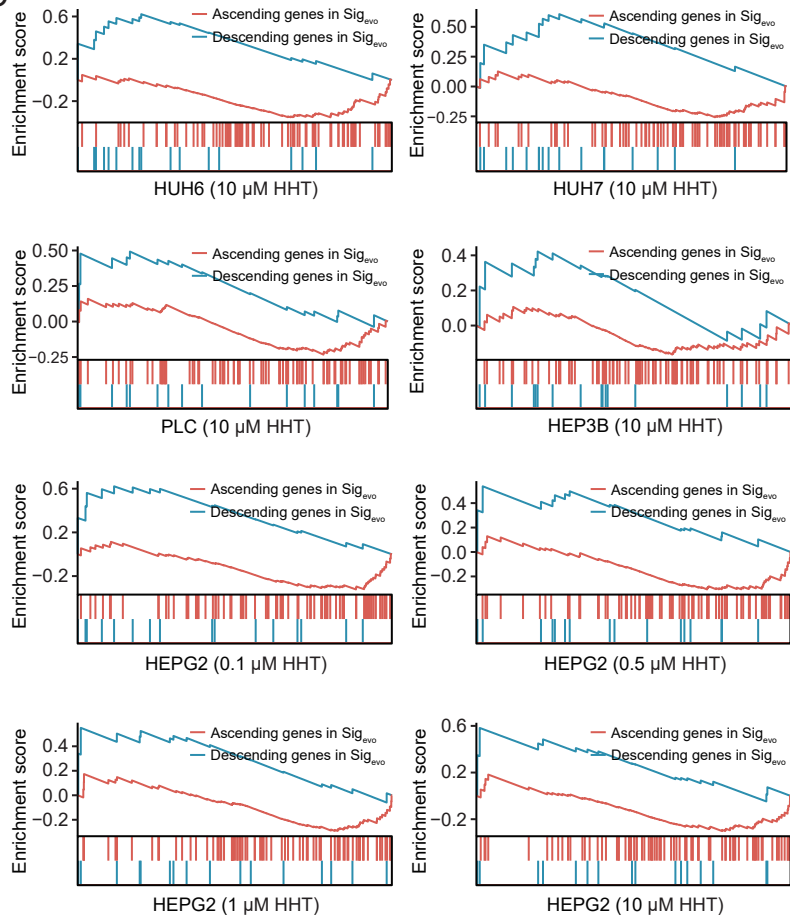

Supplement: supp [file elife-71880-supp-v1.zip › elife_poa_e71880_Figure_7_figure_supplement_1.pdf]

**A**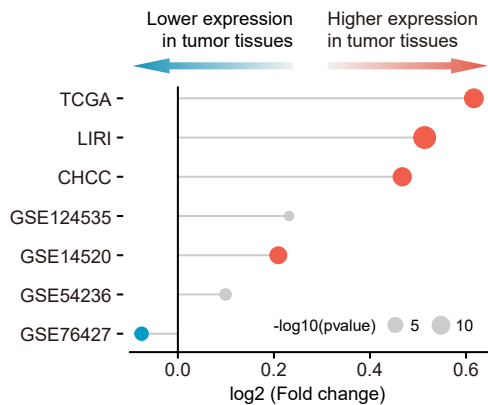**B**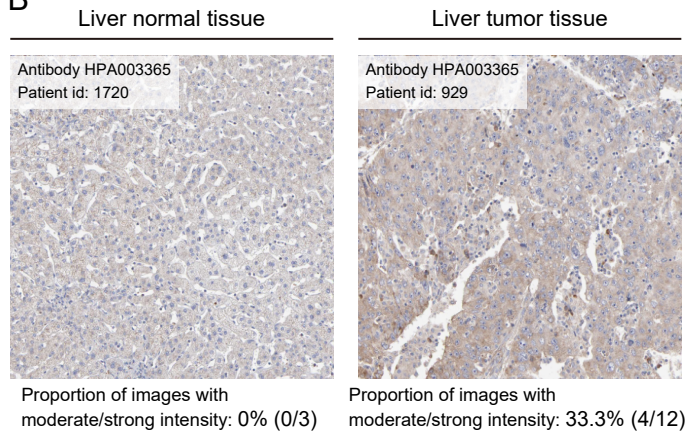**C**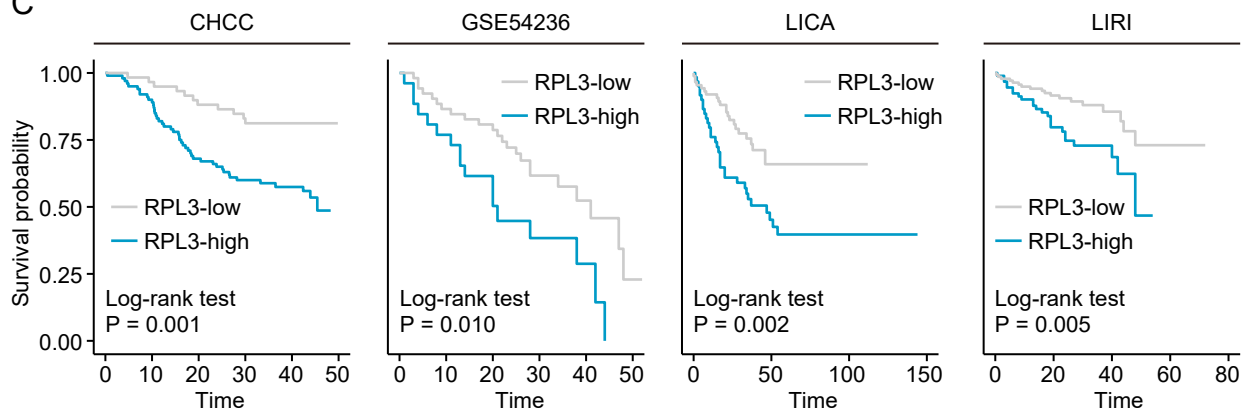**D**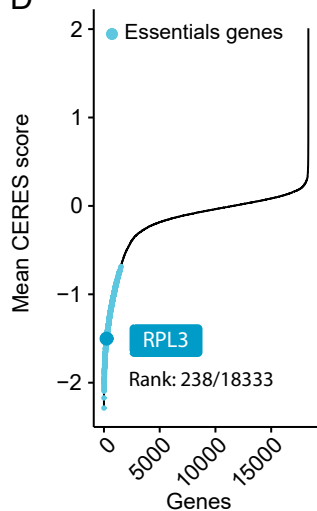**E**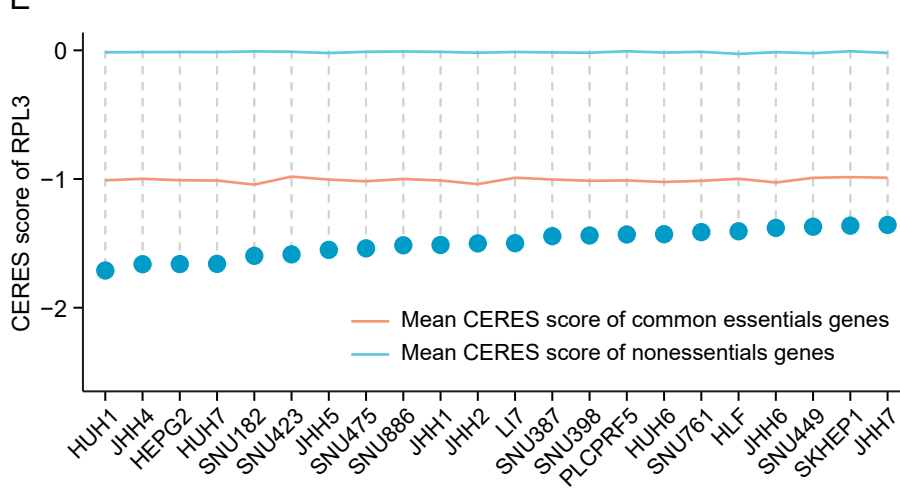

Supplement: supp [file elife-71880-supp-v1.zip › elife_poa_e71880_Figure_7_figure_supplement_2.pdf]

MHCC97H

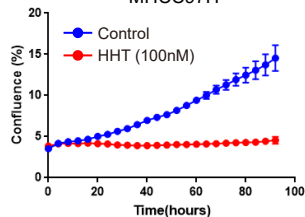

SNU449

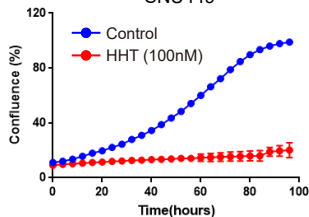

HEP3B217

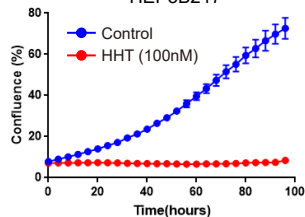

HUH7

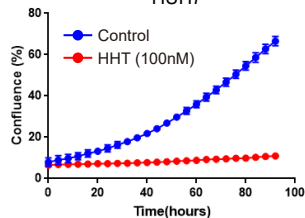

PLCPRF5

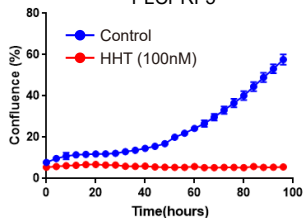

HUH6

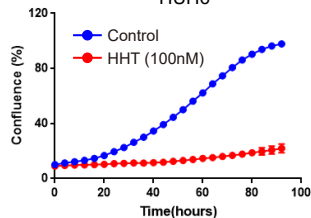

HEPG2

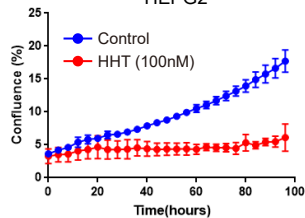

SKHEP1

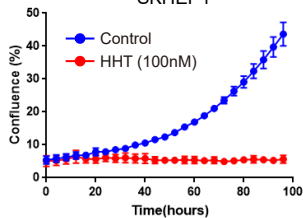

SNU475

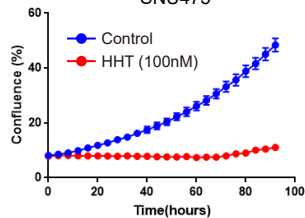

SNU398

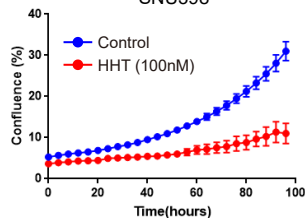

Supplement: supp [file elife-71880-supp-v1.zip › elife_poa_e71880_Figure_7_figure_supplement_3.pdf]

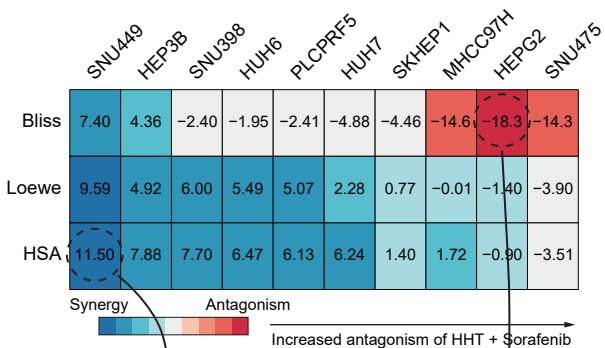

SNU449 (HSA)

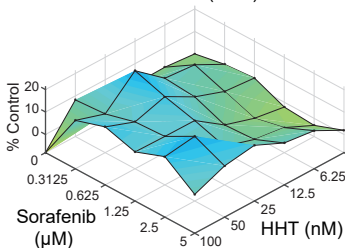

HEPG2 (Bliss)

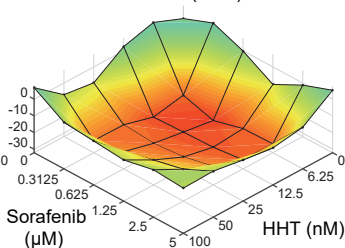

Supplement: supp [file elife-71880-supp-v1.zip › elife_poa_e71880_Figure_7_figure_supplement_4.pdf]
